# Supplementary material for: Efficient synthesis of 2-phenyl-3-substituted furo/thieno[2,3-b]quinoxalines via Sonogashira coupling reaction followed by iodocyclization and subsequent palladium-catalyzed cross-coupling reactions
Source: Royal Society of Chemistry journal article supplement (doi:10.1039/c6ra15425e), 2016-01-01
Supplement: c6ra15425e1.pdf [file c6ra15425e1.pdf]

## Efficient synthesis of 2-phenyl-3- substituted furo/thieno[2,3-b]quinoxalines *via* Sonogashira coupling reaction followed by iodocyclization and subsequent palladium-catalyzed cross-coupling reactions

Tayebeh Besharati-Seidani,<sup>[a]</sup> Ali Keivanloo\*<sup>[a]</sup> and Babak Kaboudin<sup>[b]</sup>, Tsutomu Yokomatsu<sup>[c]</sup>

Characterization data and IR, <sup>1</sup>H NMR, <sup>13</sup>C NMR and mass spectra of the title compounds:

- 
- [a] School of Chemistry, Shahrood University of Technology, Shahrood 36199-95161, Iran.  
Fax: +98-233-2395441  
E-mails: [keivanloo@shahroodut.ac.ir](mailto:keivanloo@shahroodut.ac.ir), [akeivanloo@yahoo.com](mailto:akeivanloo@yahoo.com)
- [b] Department of Chemistry, Institute for Advanced Studies in Basic Sciences, Gava Zang, Zanjan 45137-66731, Iran.  
Fax: +98-241-4214949  
E-mail: [kaboudin@iasbs.ac.ir](mailto:kaboudin@iasbs.ac.ir)

- [C] School of Pharmacy, Tokyo University of Pharmacy and Life Sciences, 1432-1 Horinouchi, Hachioji, Tokyo 192-0392, Japan

Supporting information for this article is given via a link at the end.

## Numbering employed in NMR analysis

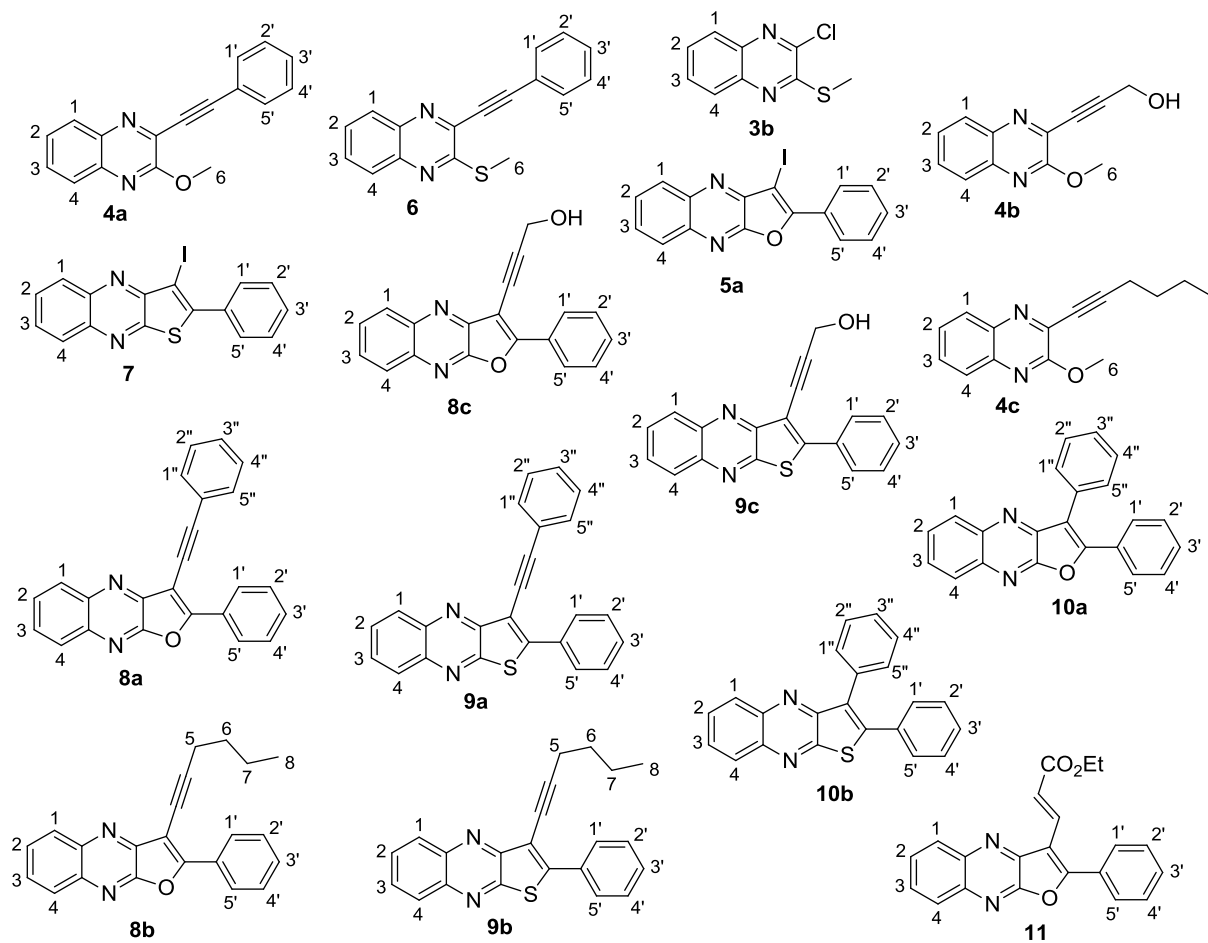

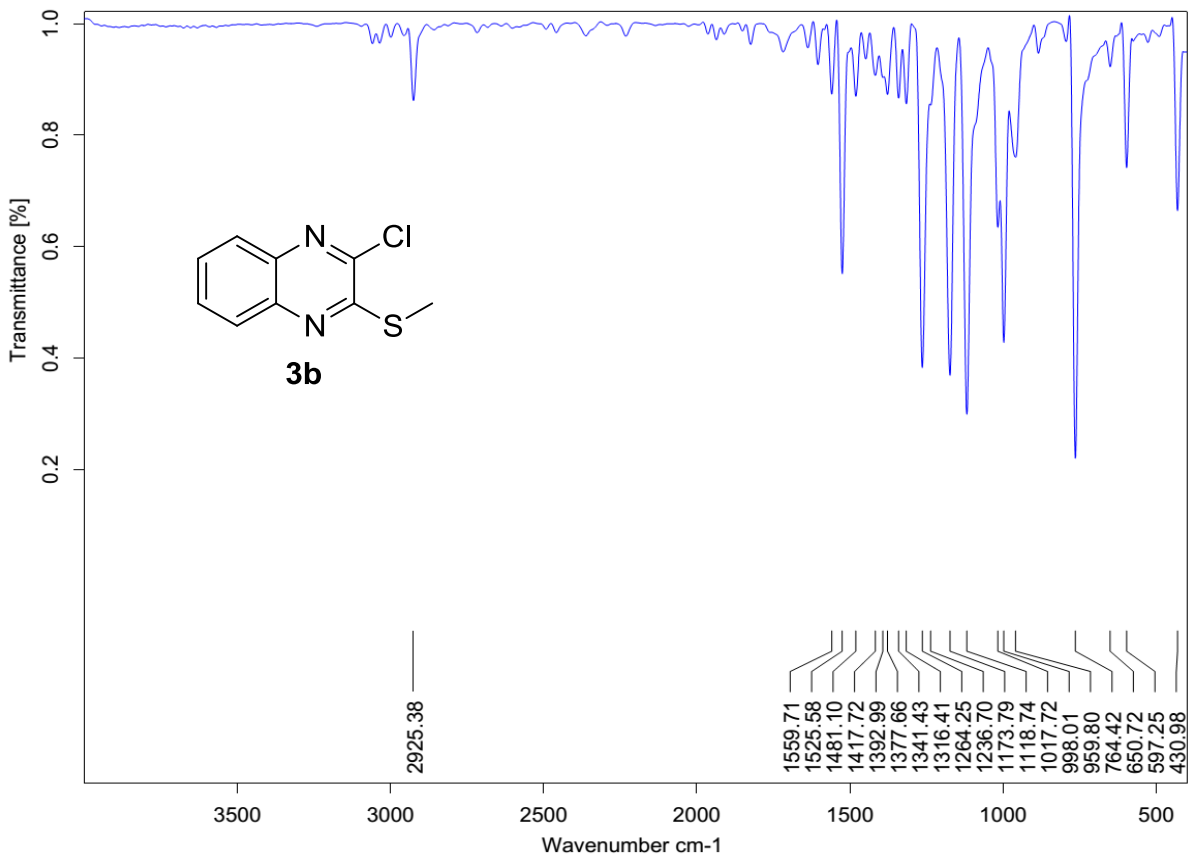

Figure 1: IR spectrum of 3b

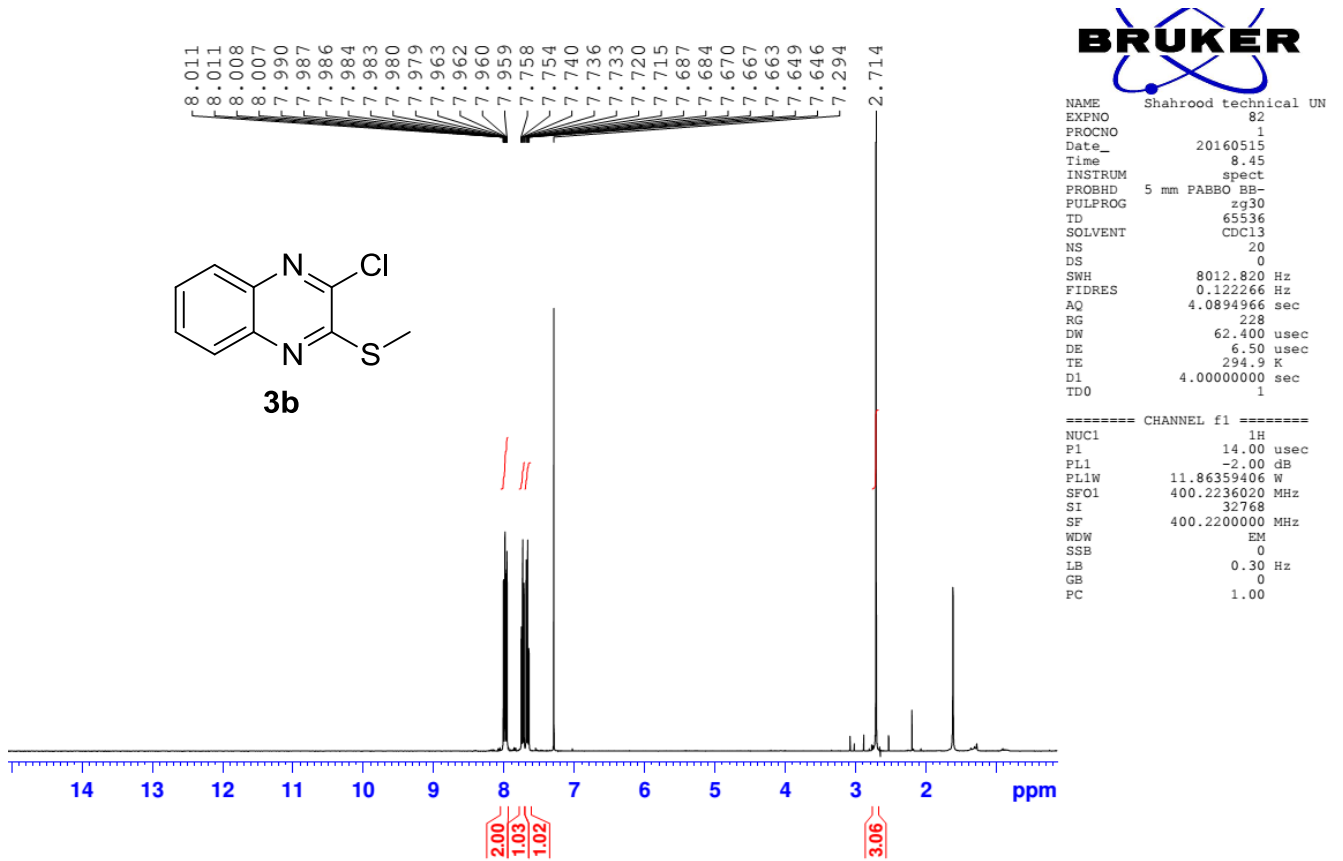

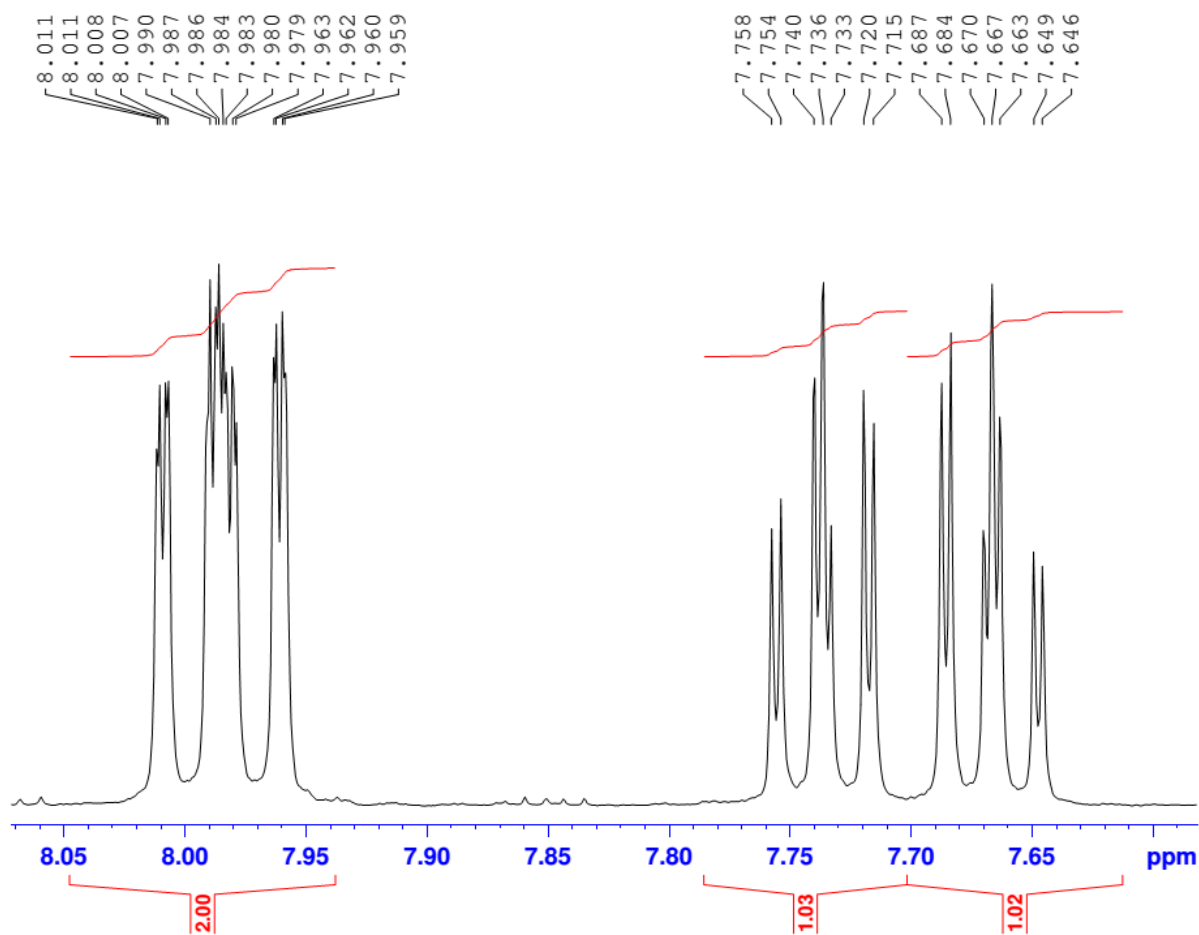

Figure 2: <sup>1</sup>H NMR spectrum of 3b

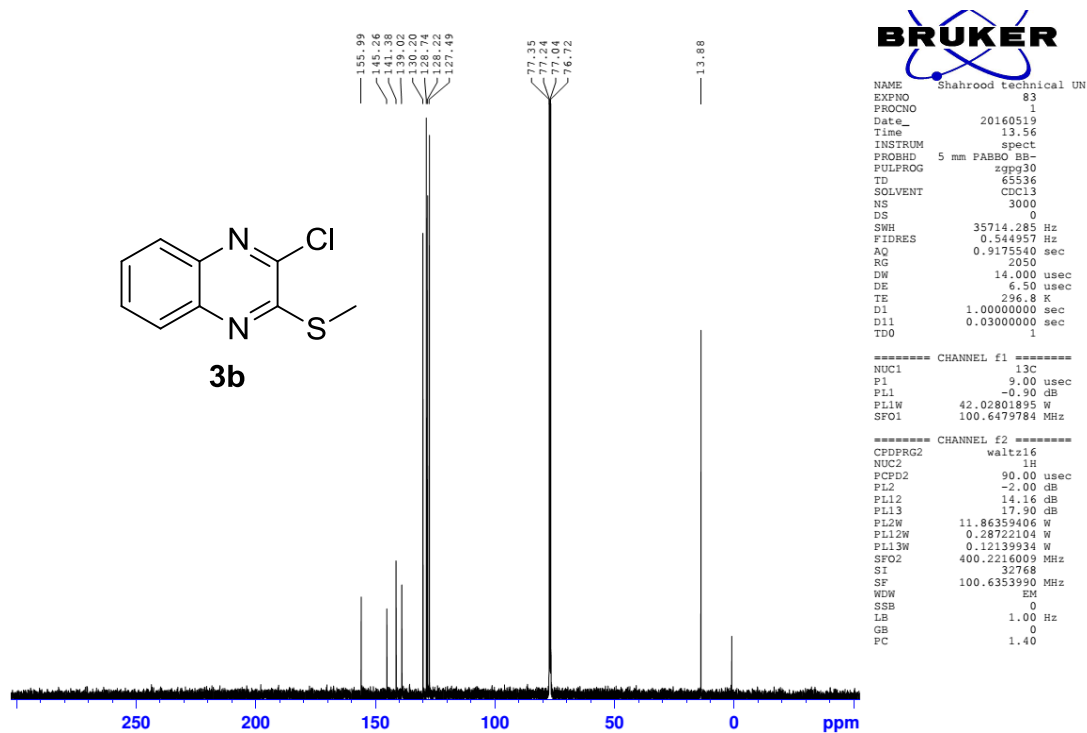

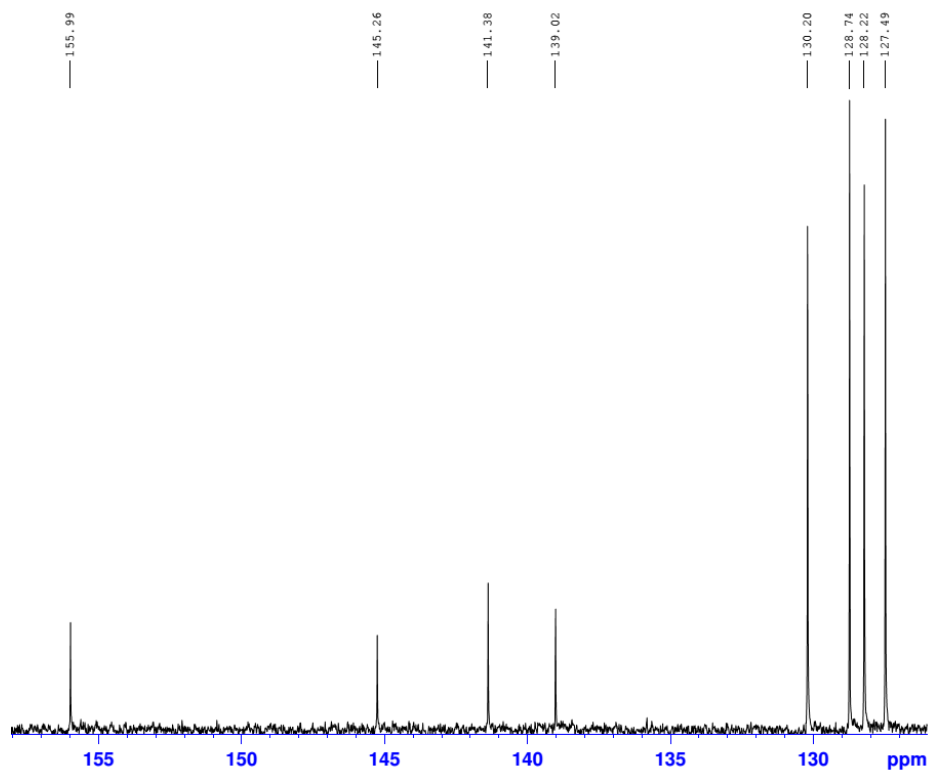

**Figure 3:** <sup>13</sup>C NMR spectrum of 3b

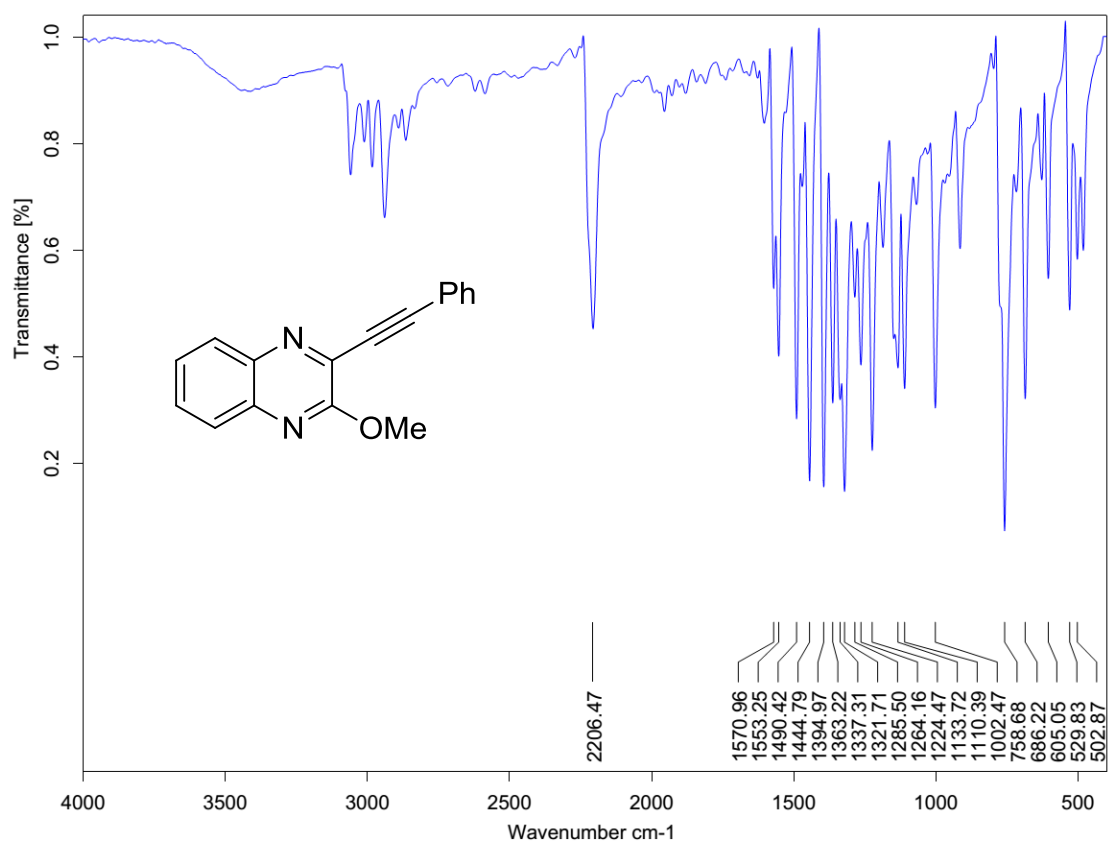

**Figure 4:** IR spectrum of 4a

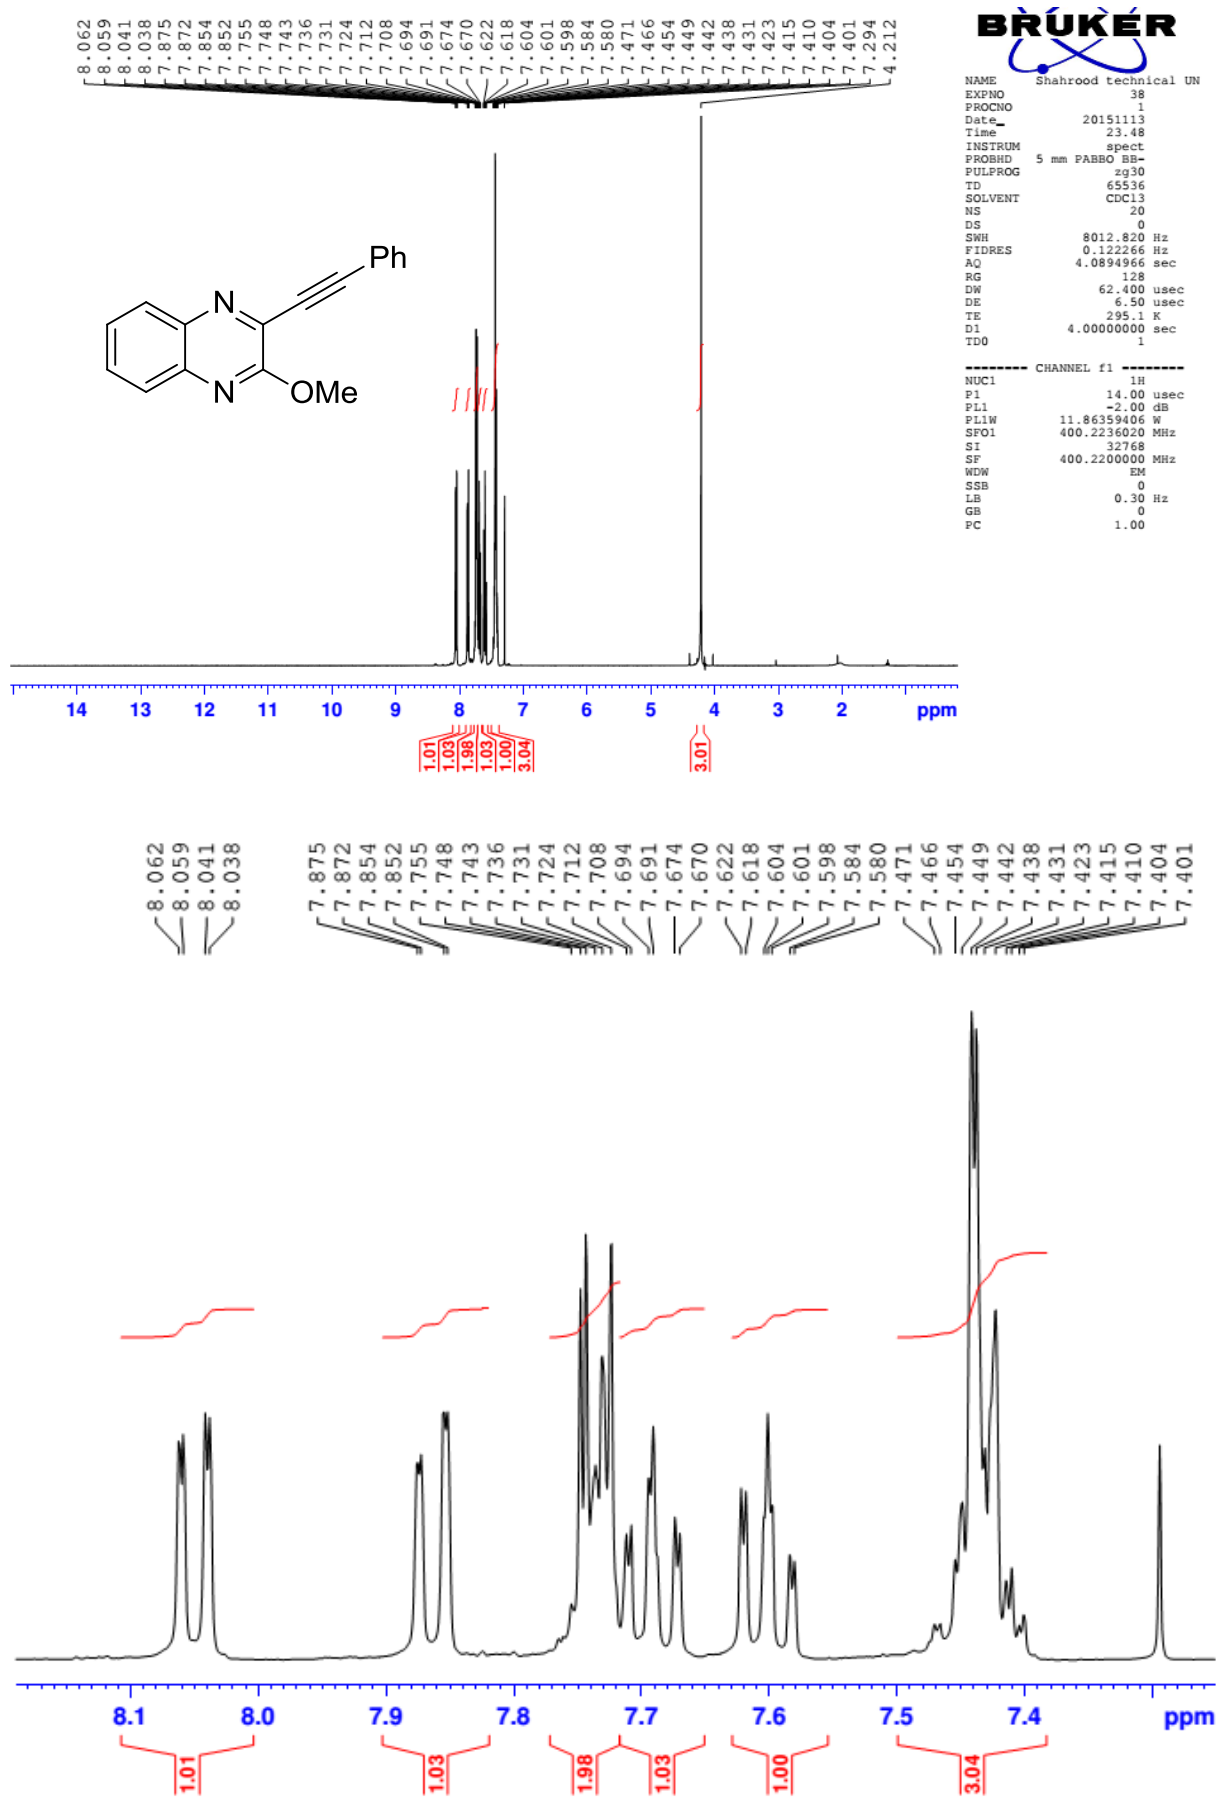

Figure 5:  $^1\text{H}$  NMR spectrum of 4a

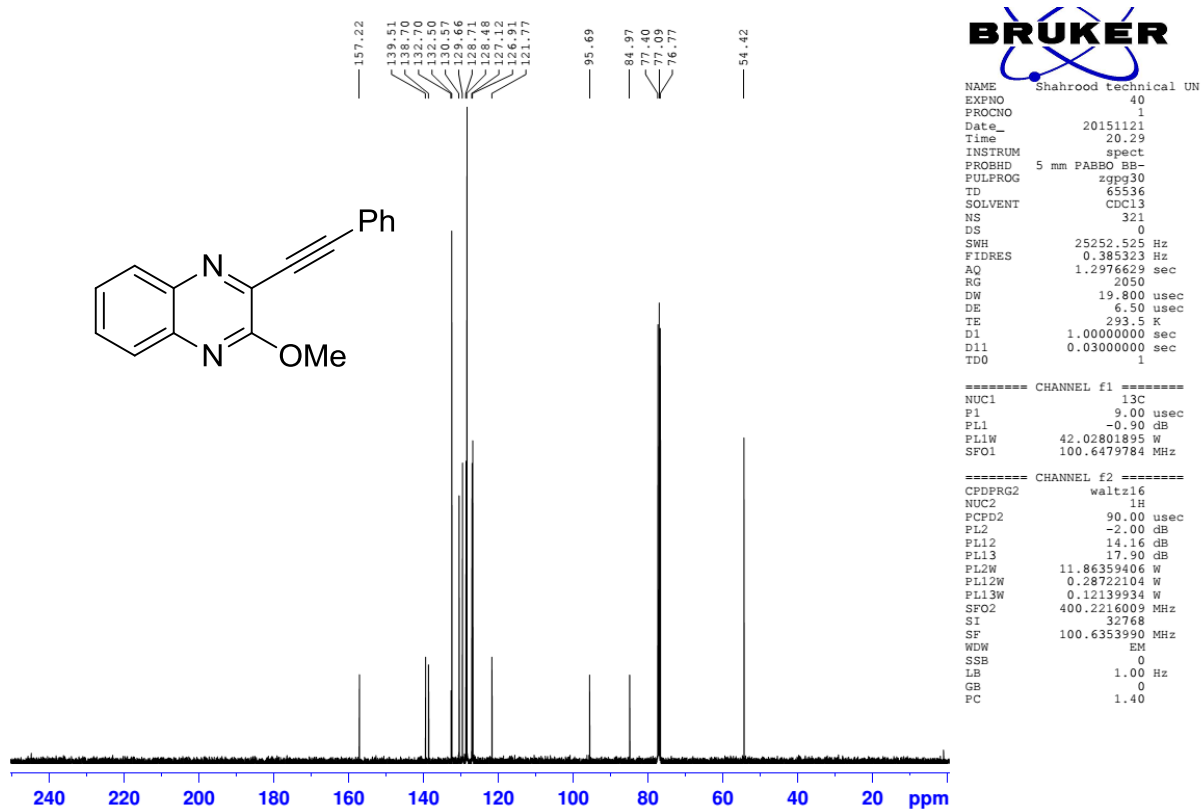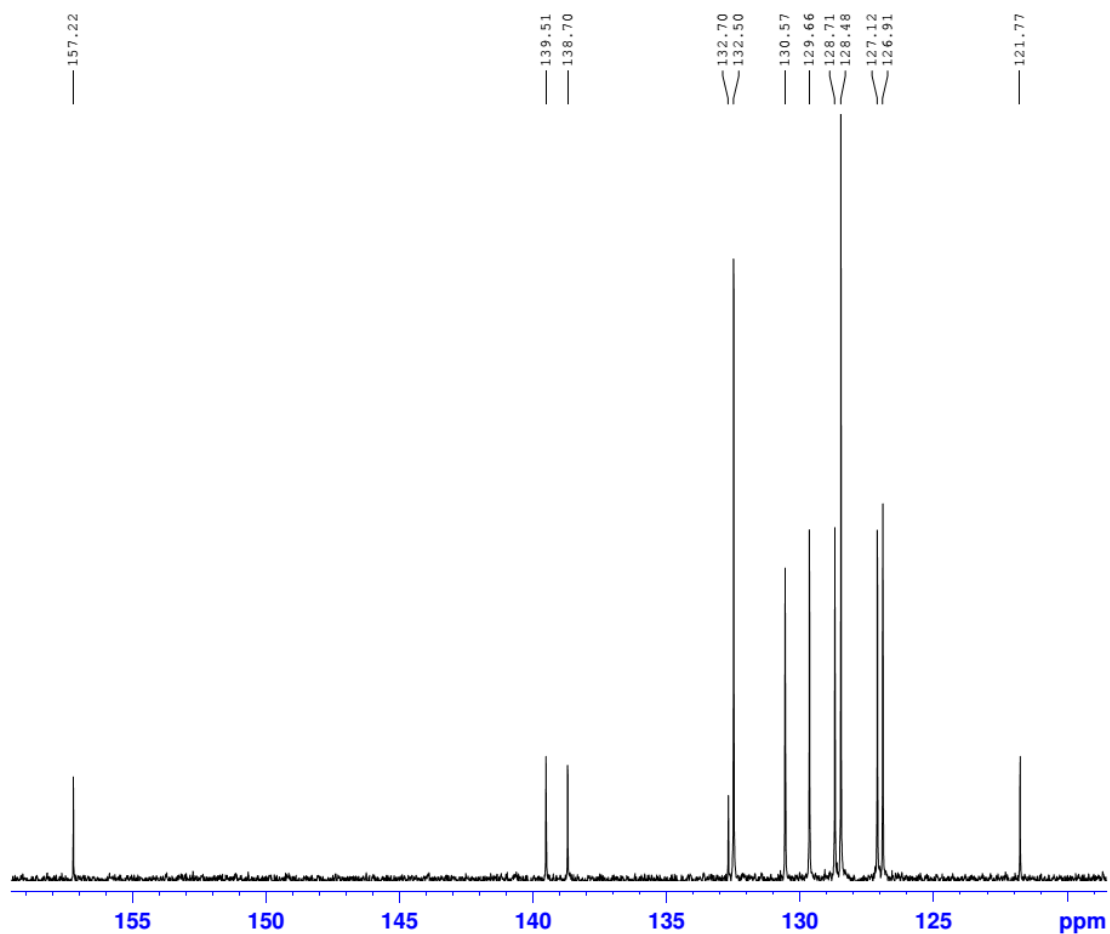

Figure 6:  $^{13}\text{C}$  NMR spectrum of 4a

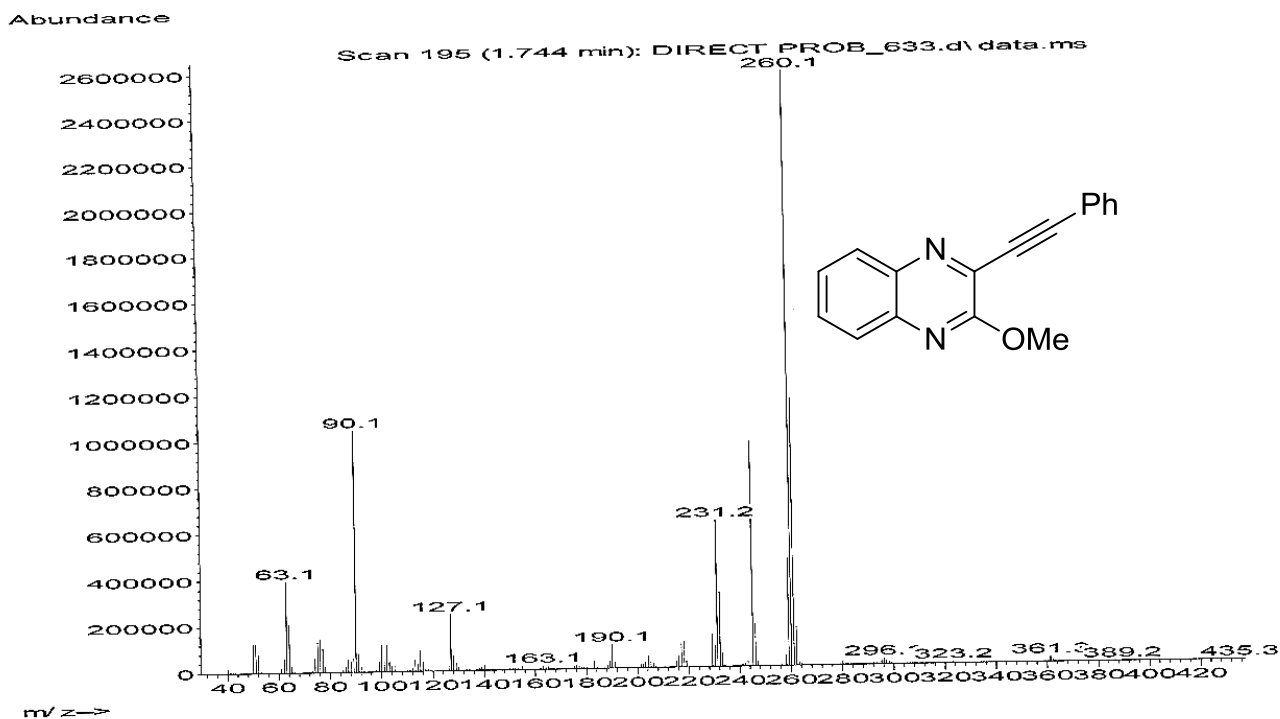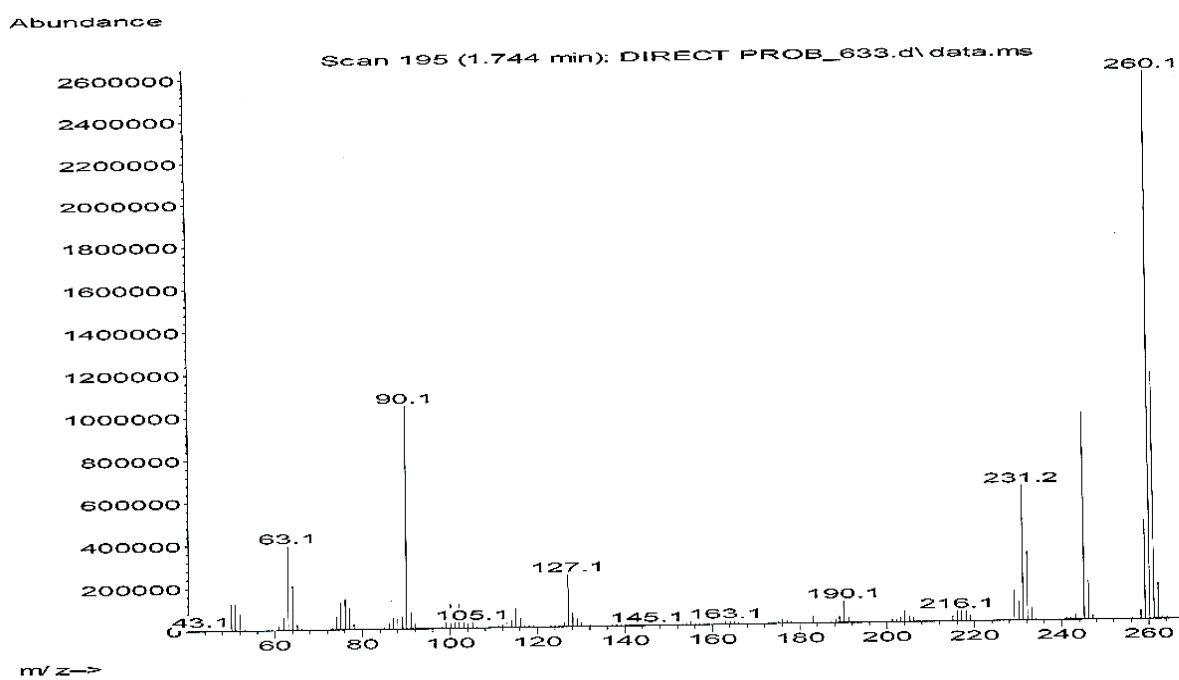

Figure 7: Mass spectrum of 4a



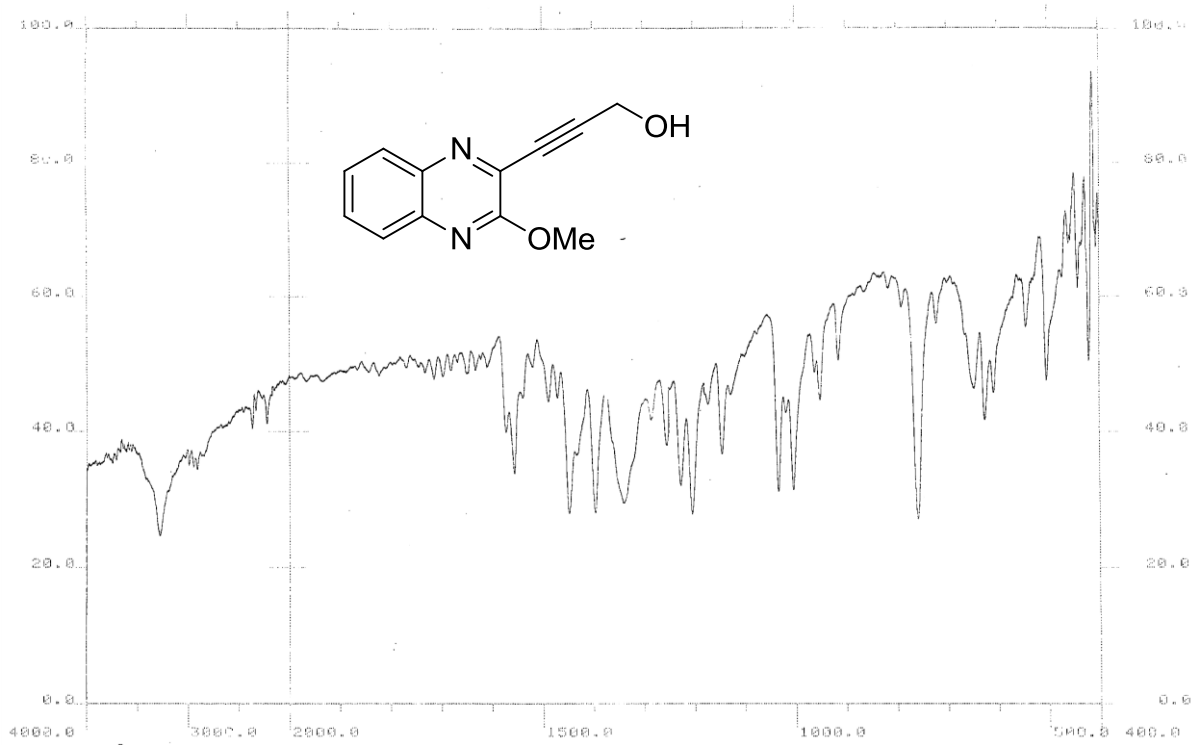

Figure 8: IR spectrum of 4b

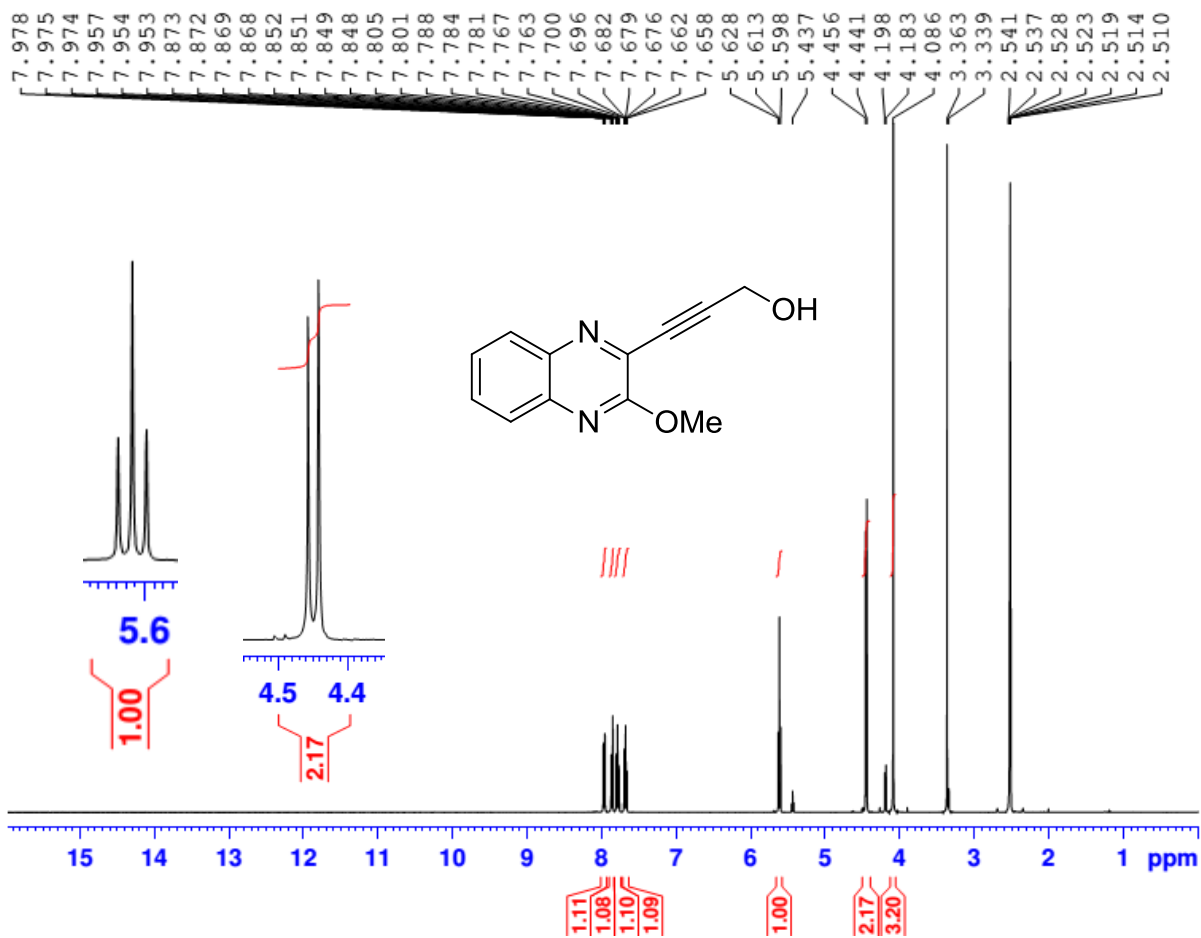

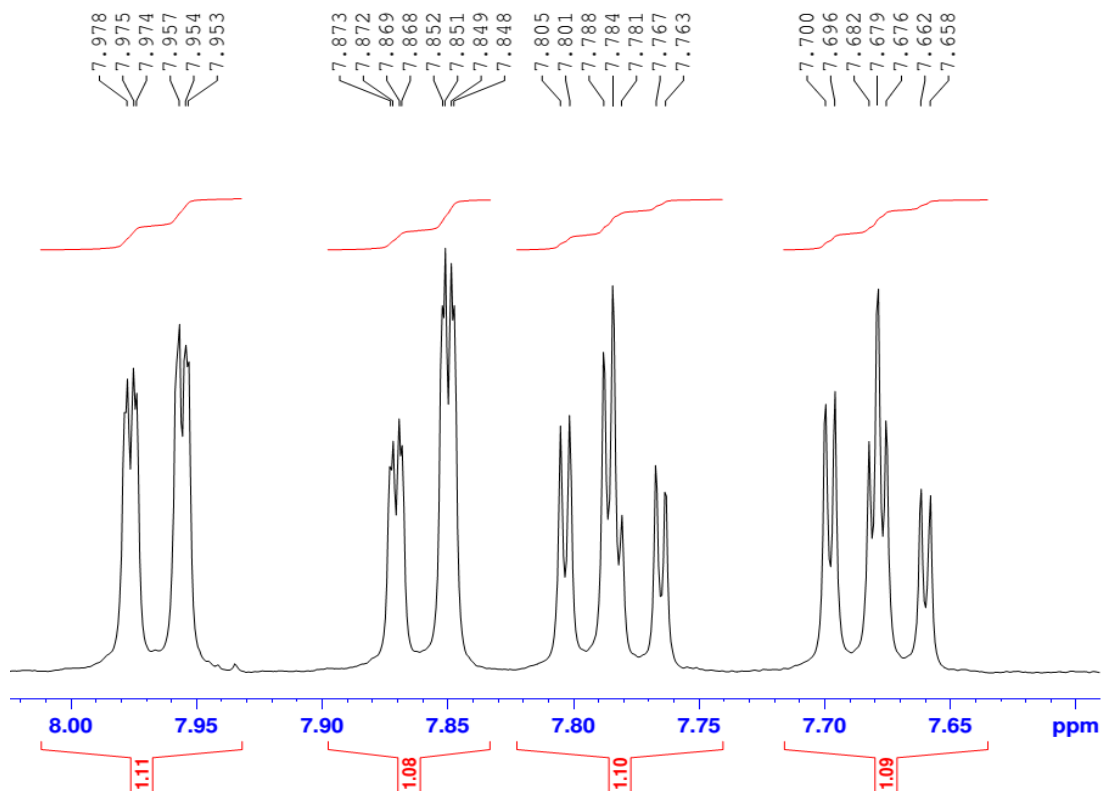

Figure 9:  $^1\text{H}$  NMR spectrum of **4b**

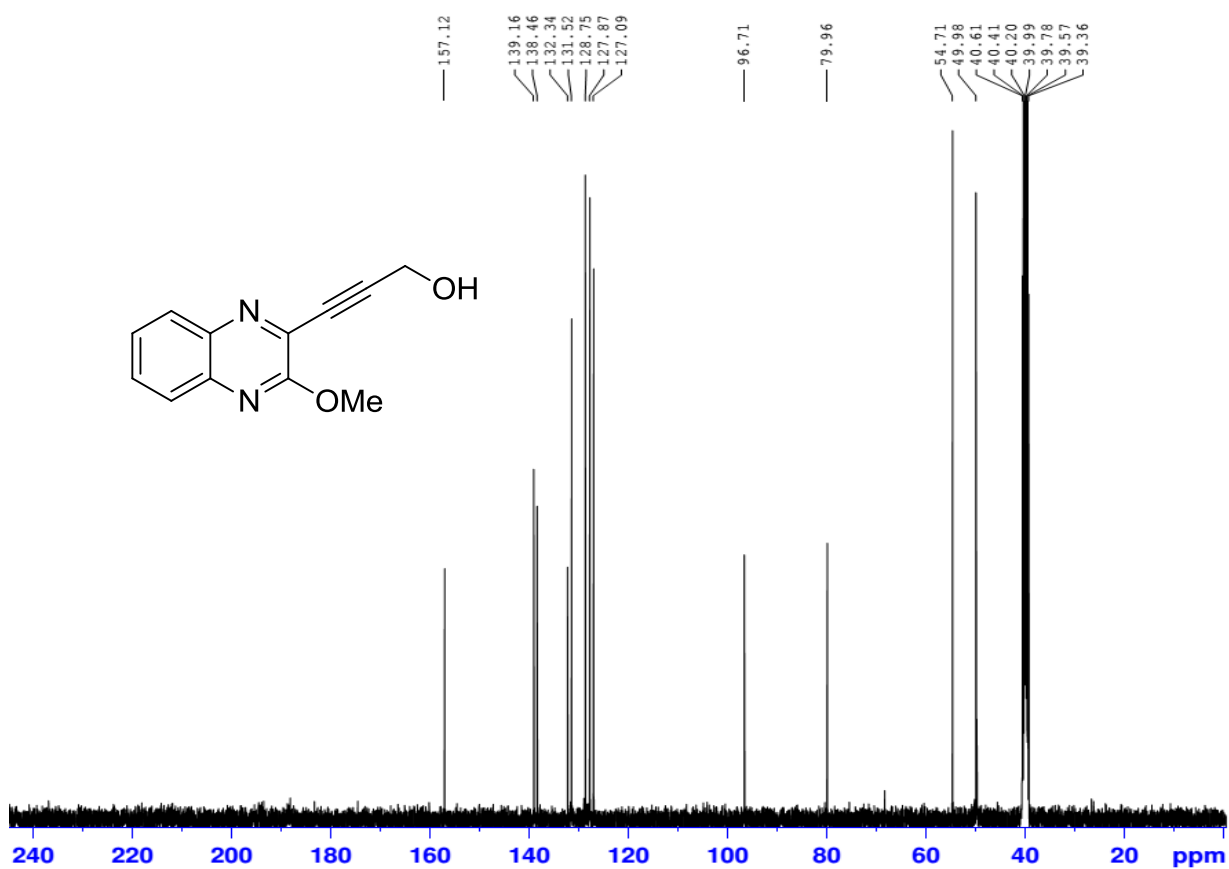

Figure 10:  $^{13}\text{C}$  NMR spectrum of **4b**

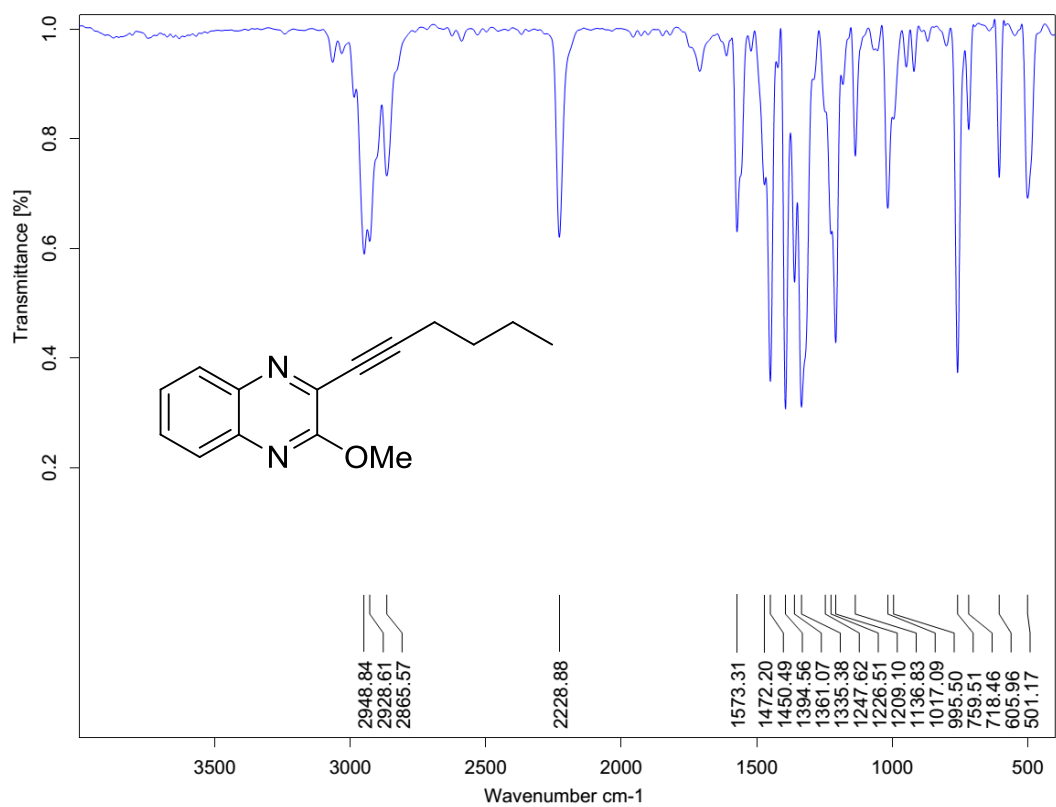

Figure 11: IR spectrum of 4c

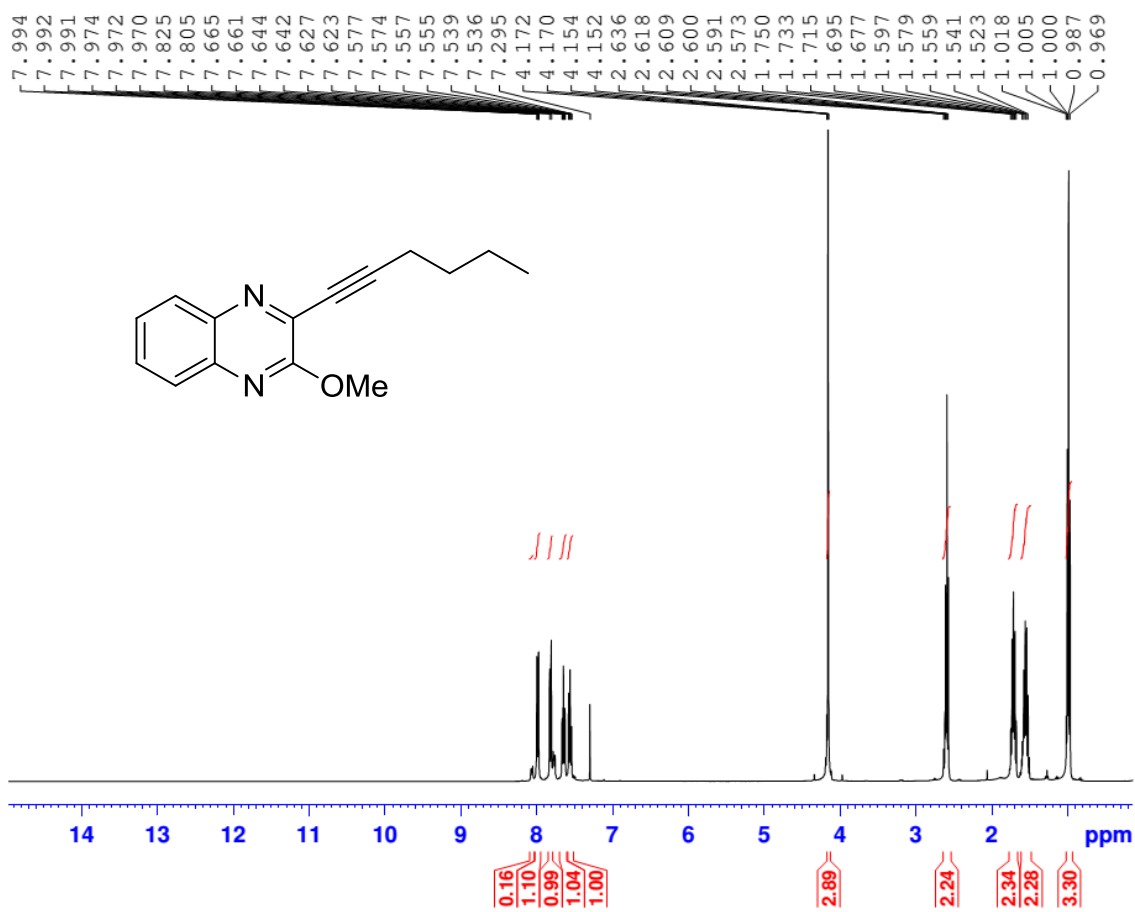

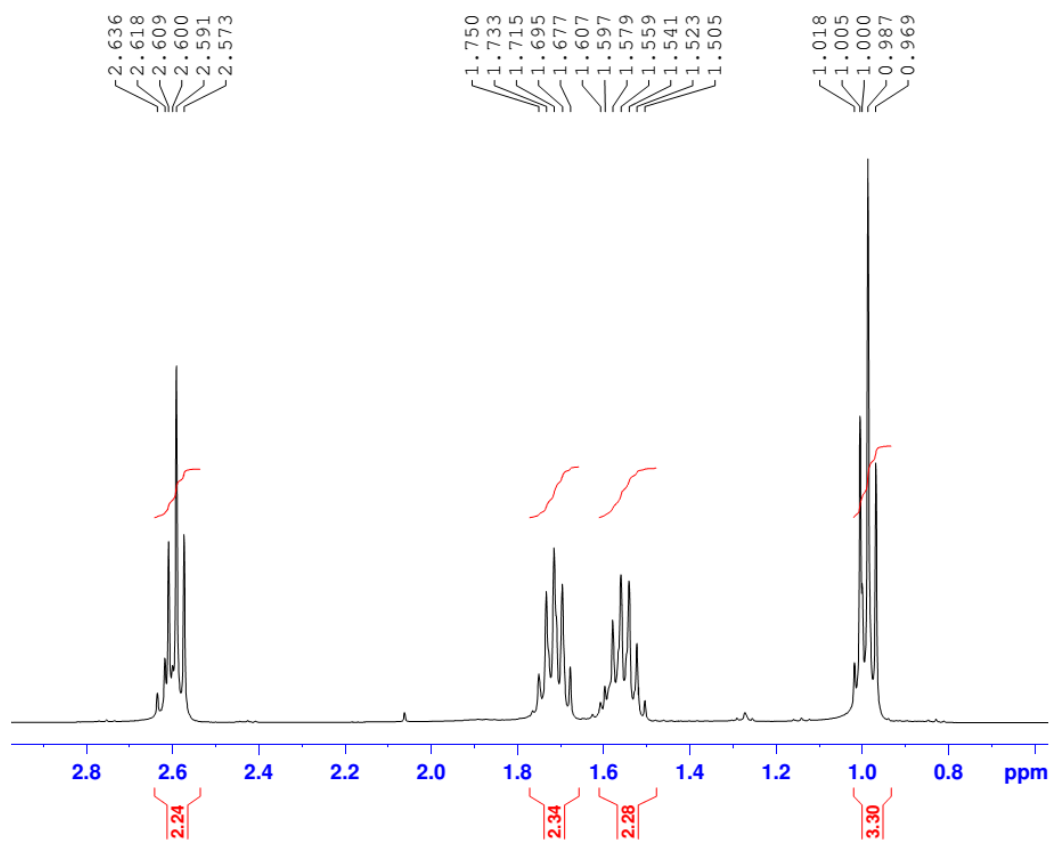

Figure 12:  $^1\text{H}$  NMR spectrum of **4c**

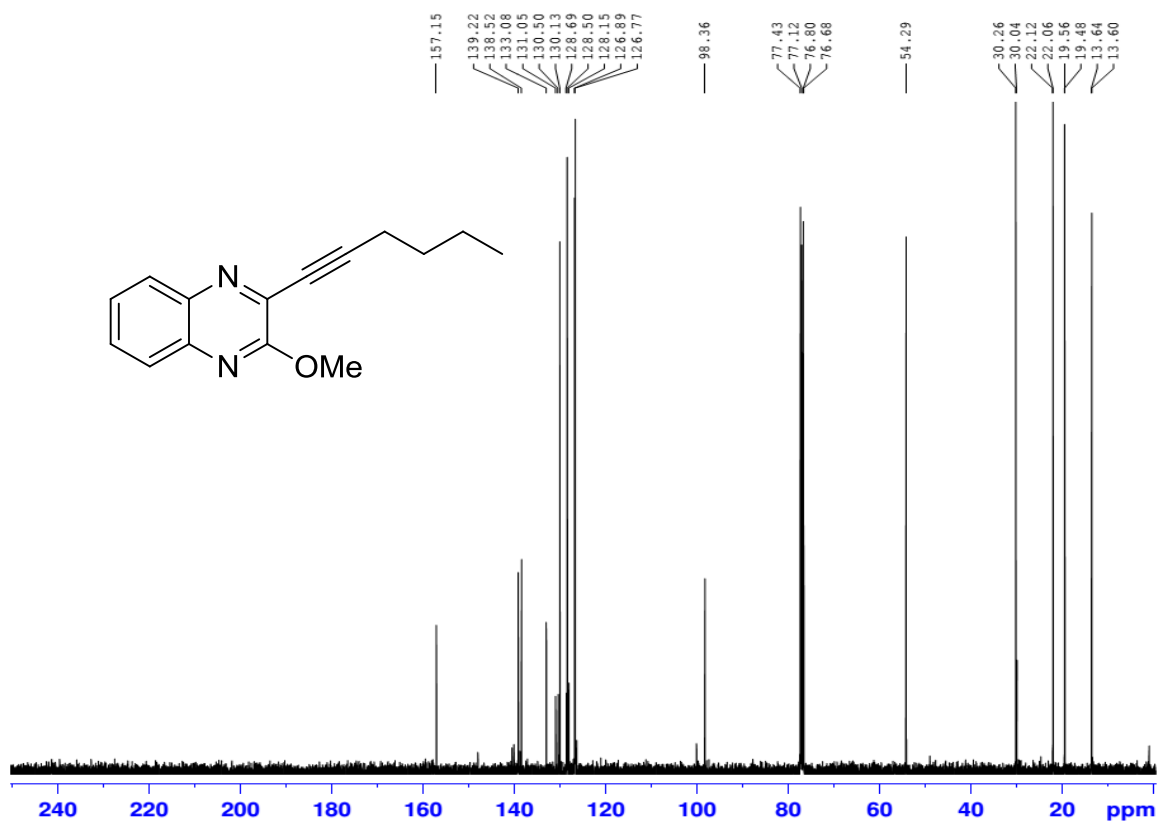

Figure 13:  $^{13}\text{C}$  NMR spectrum of **4c**

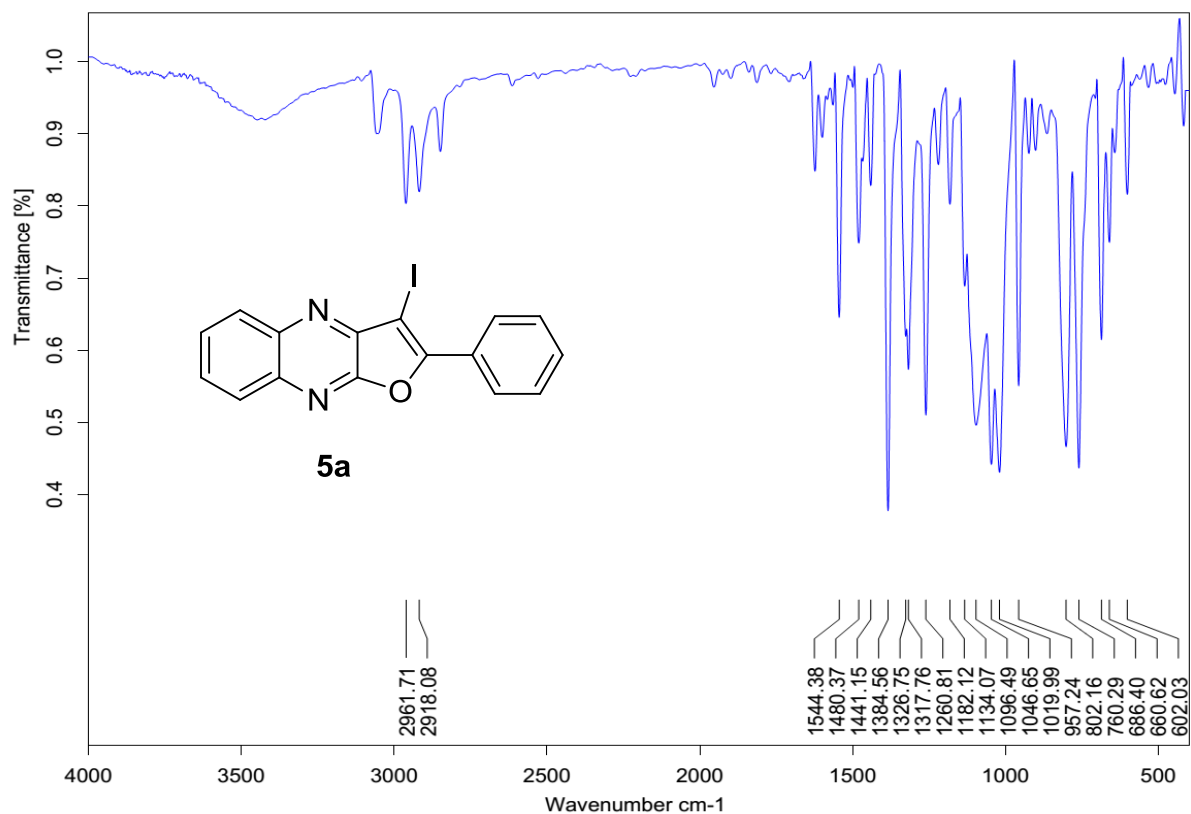

Figure 14: IR spectrum of 5a

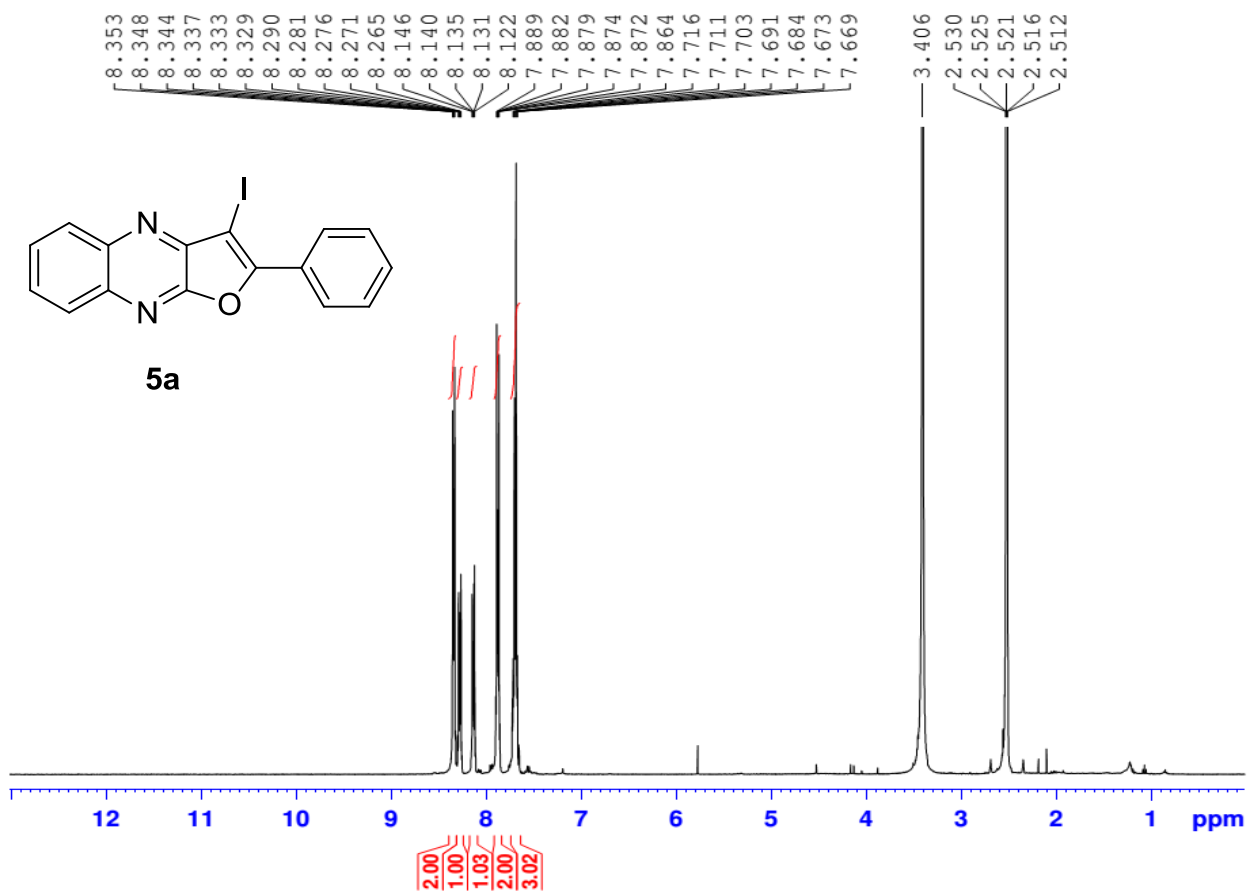

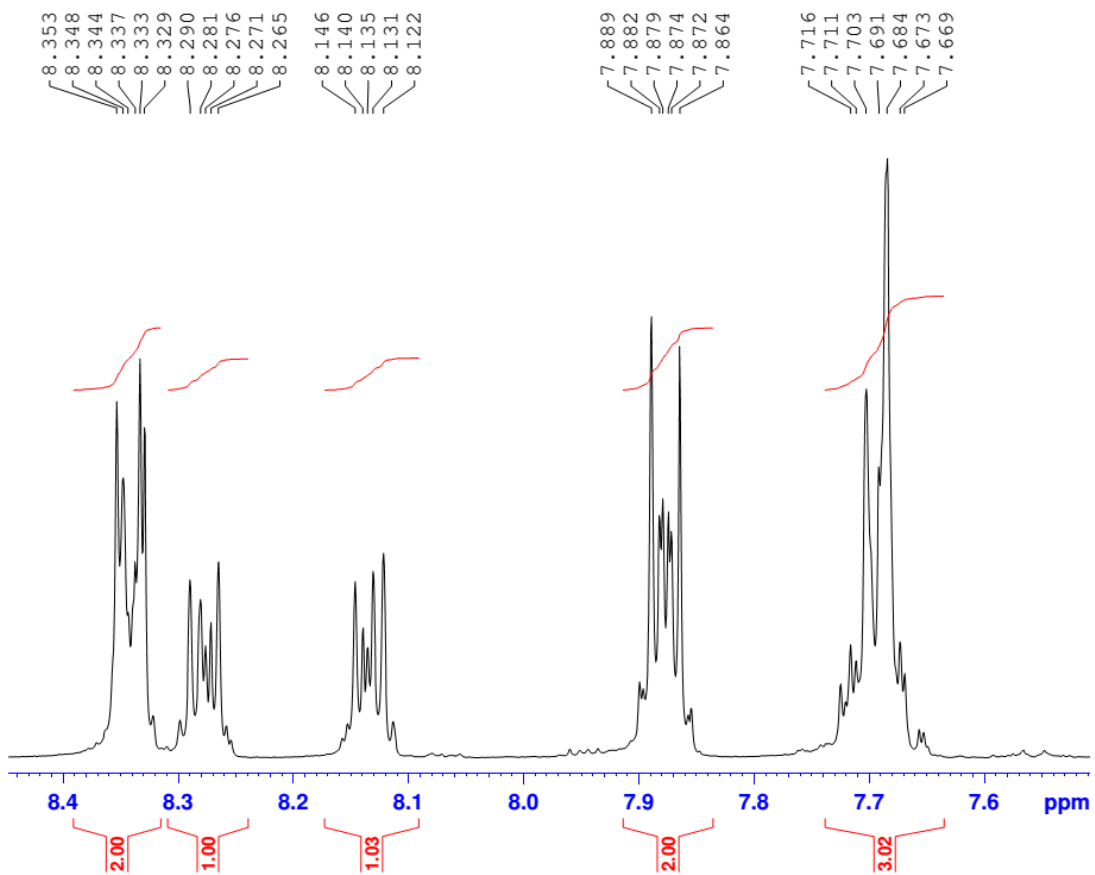

Figure 15: <sup>1</sup>H NMR spectrum of 5a

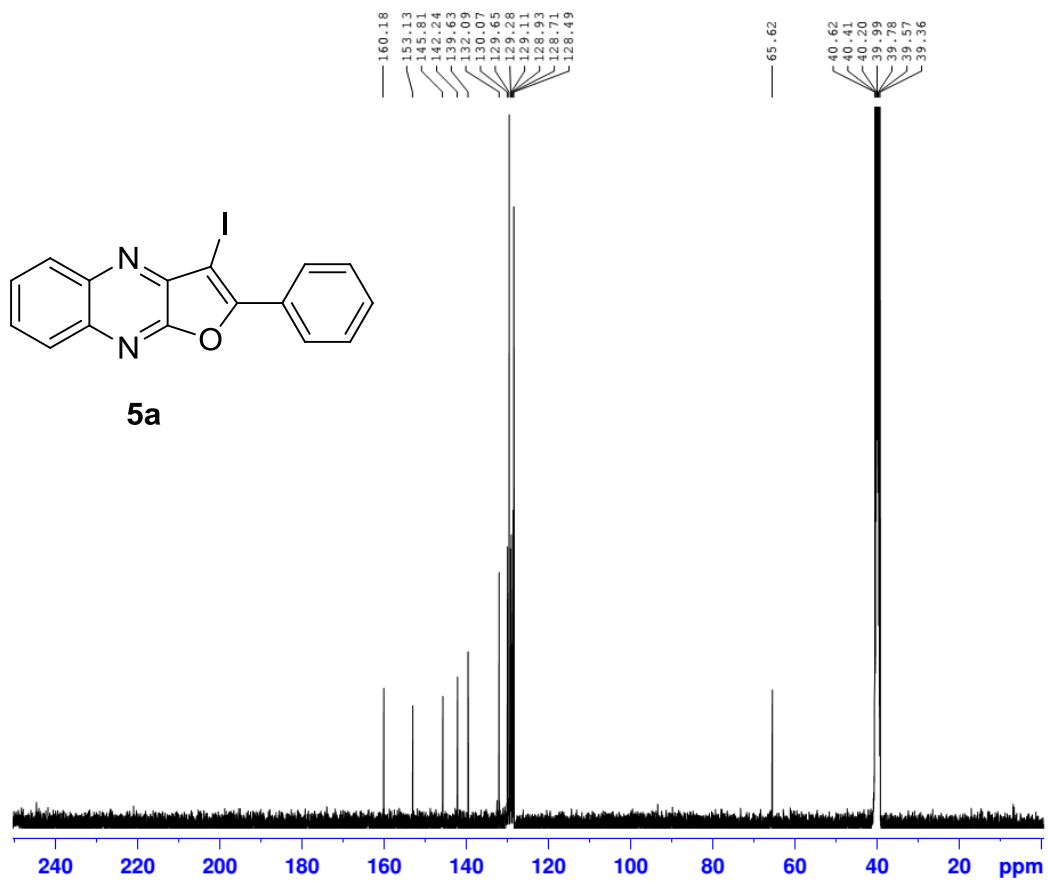

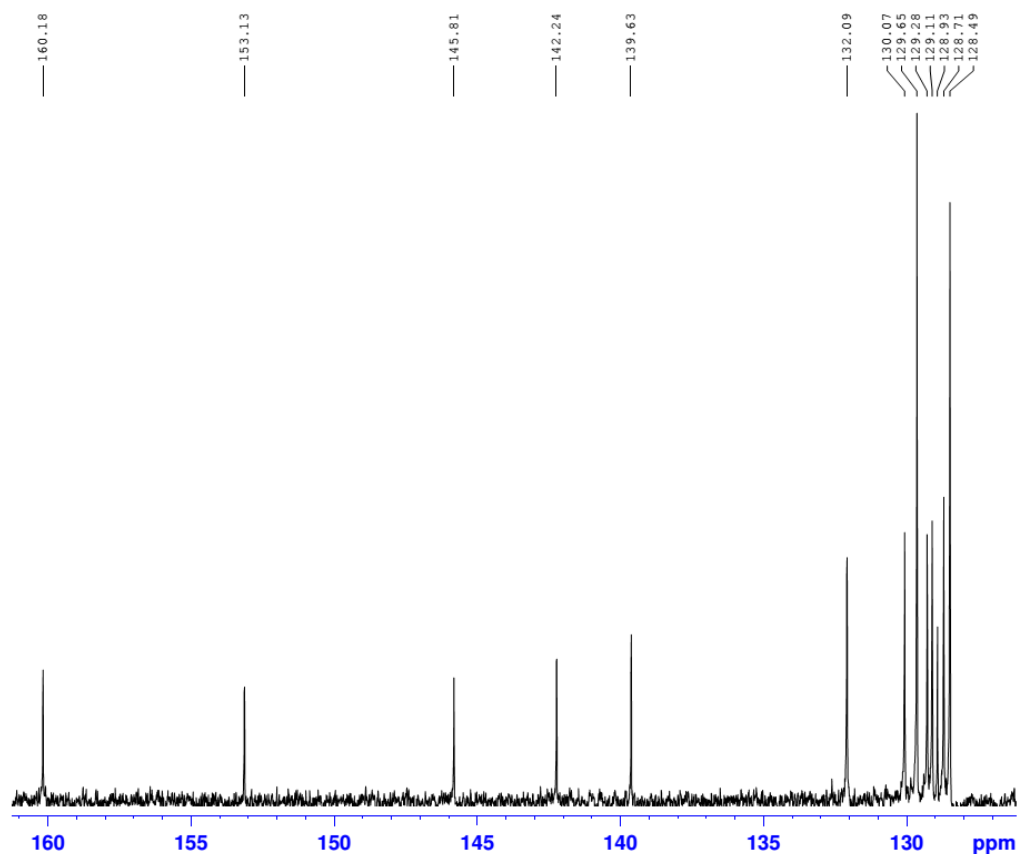

Figure 16:  $^{13}\text{C}$  NMR spectrum of 5a

Abundance

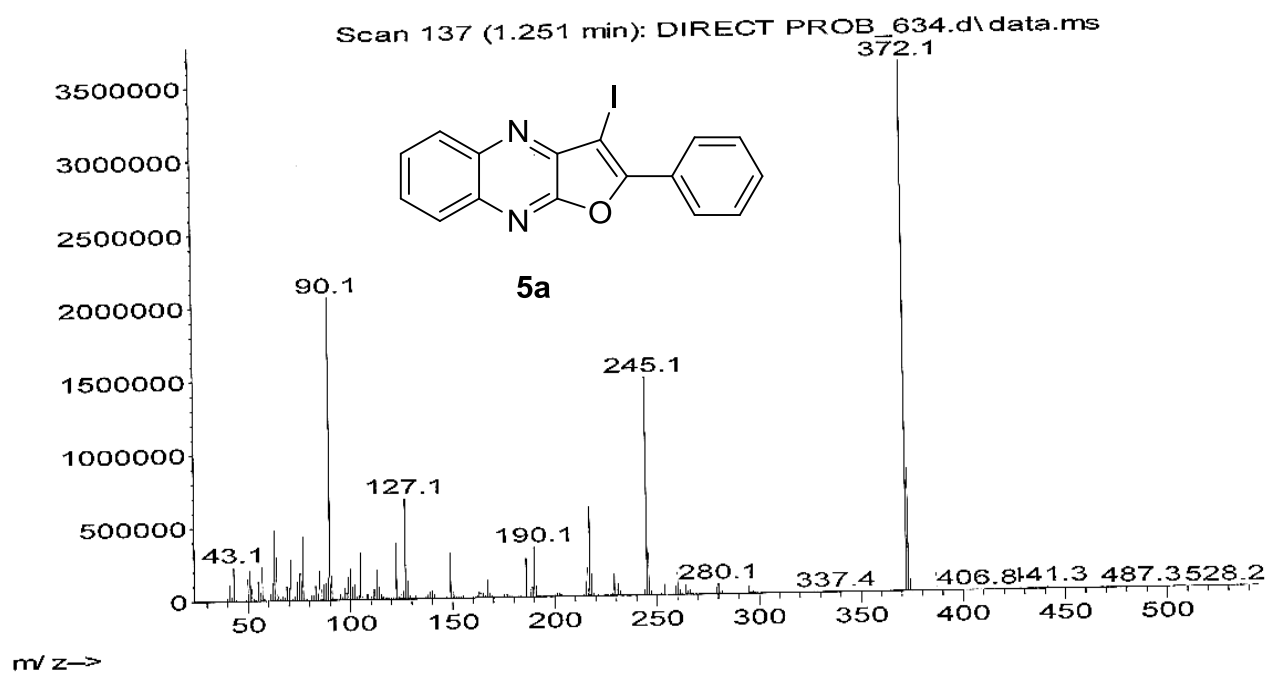

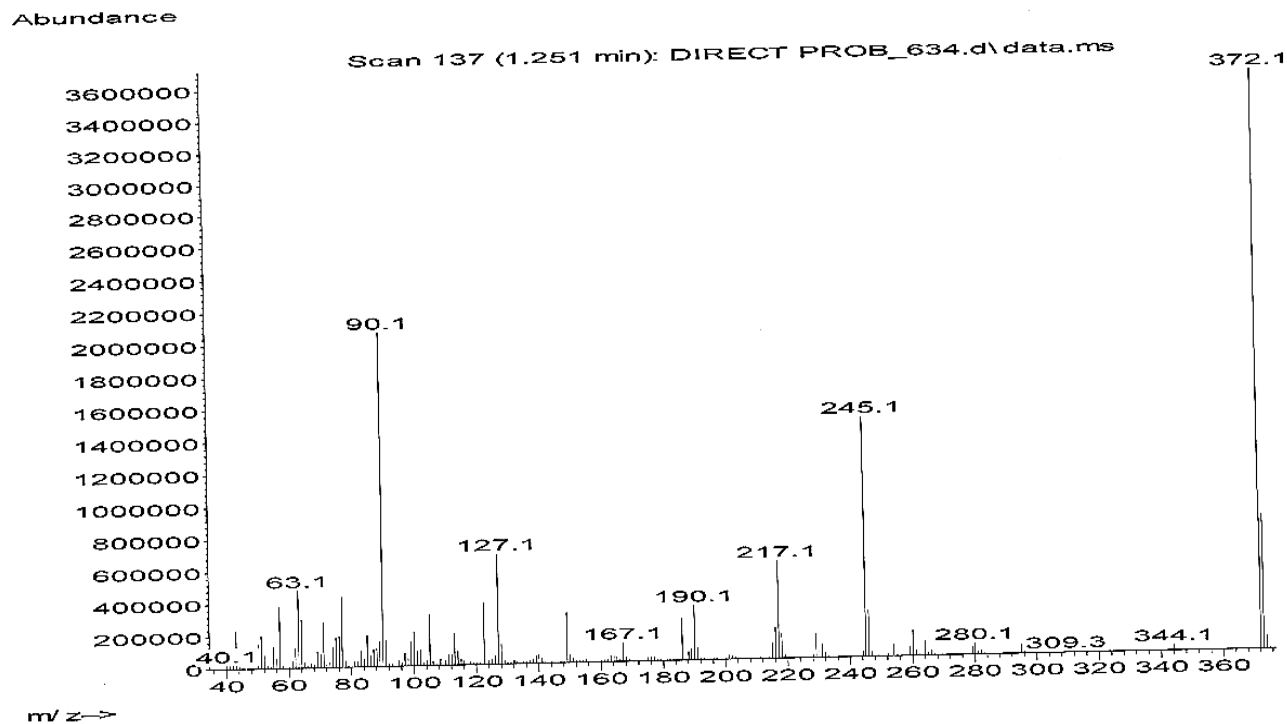

Figure 17: Mass spectrum of 5a

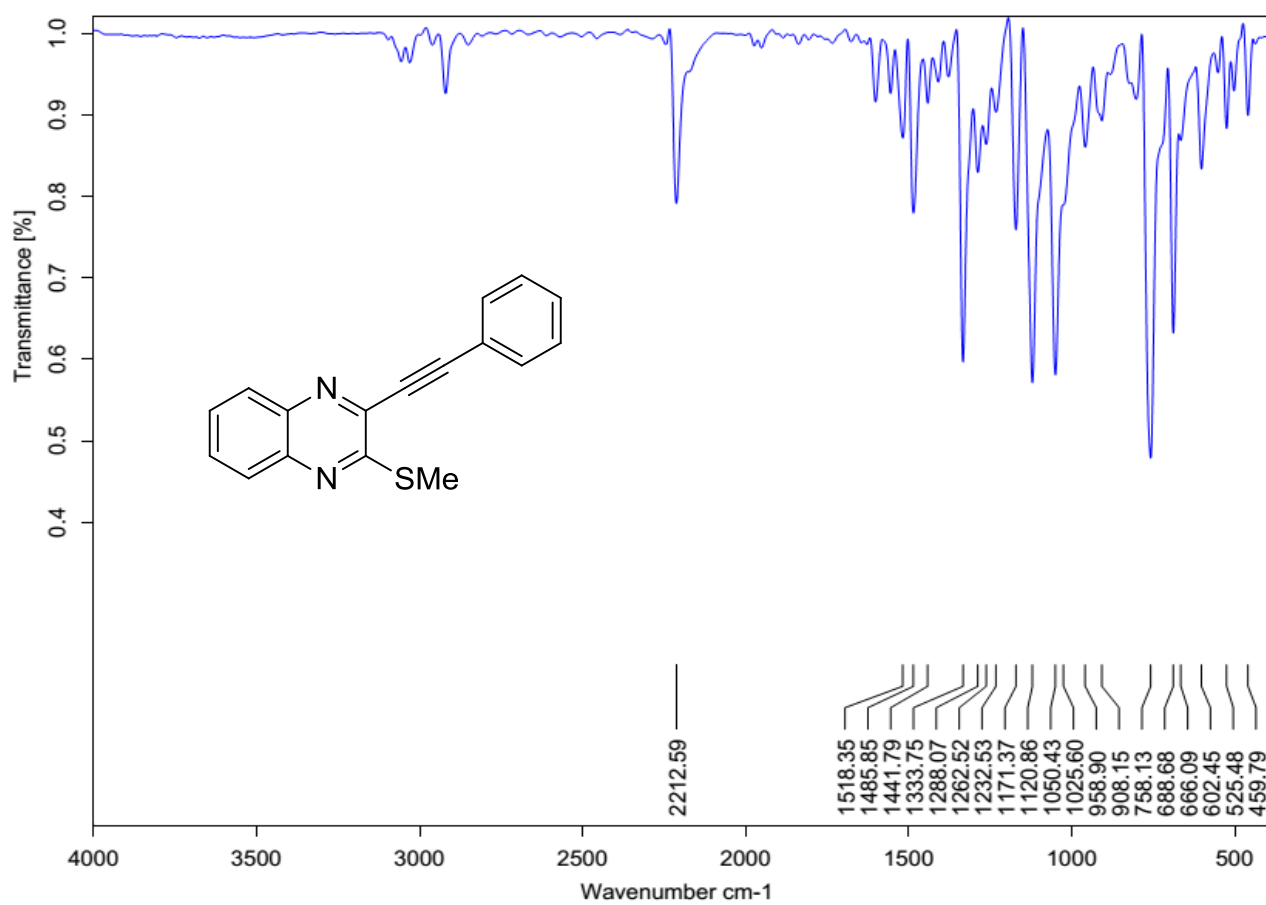

Figure 18: IR spectrum of 6



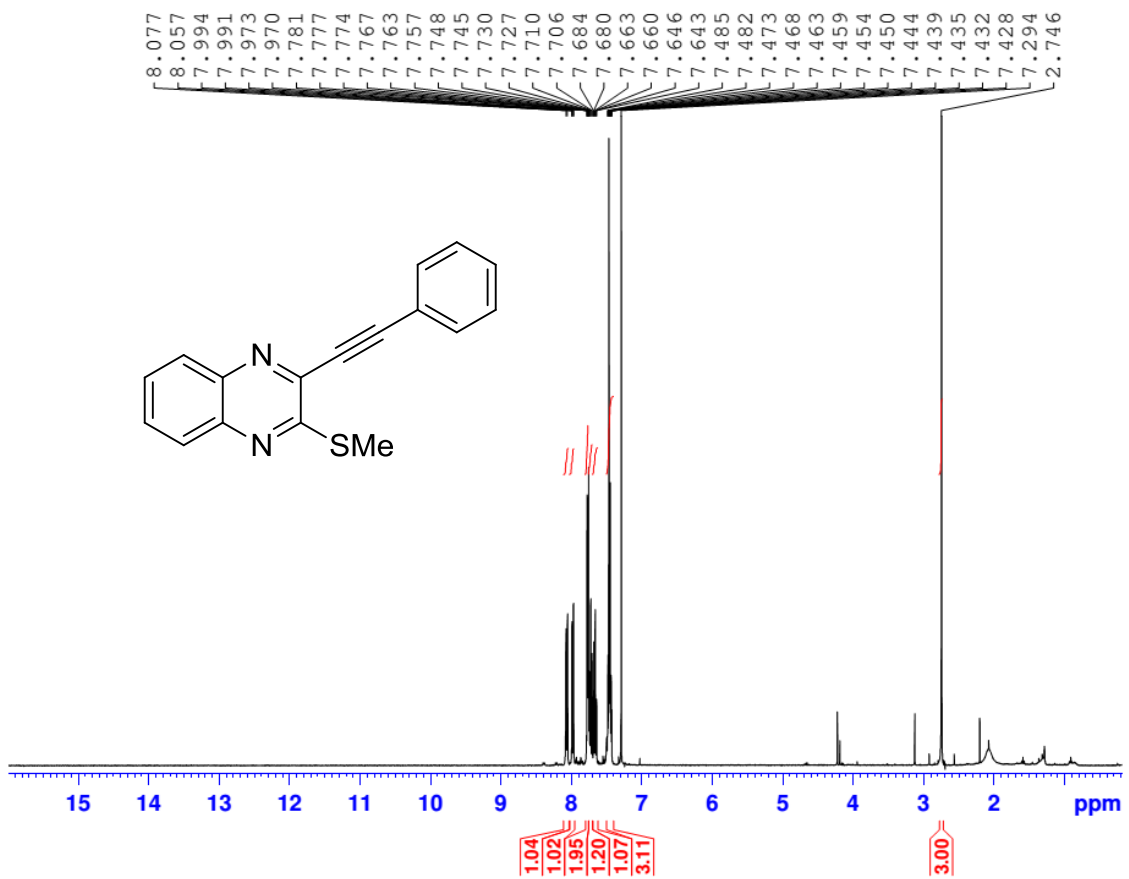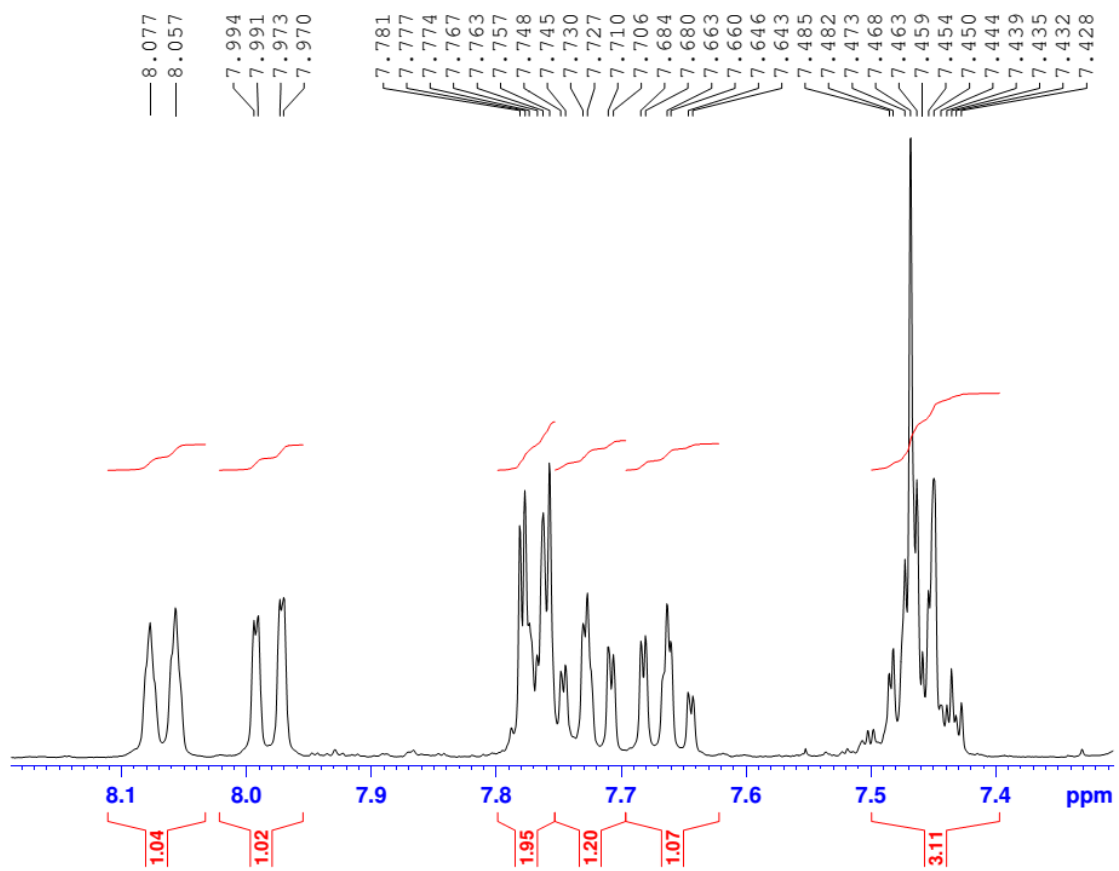

Figure 19:  $^1\text{H}$  NMR spectrum of 6

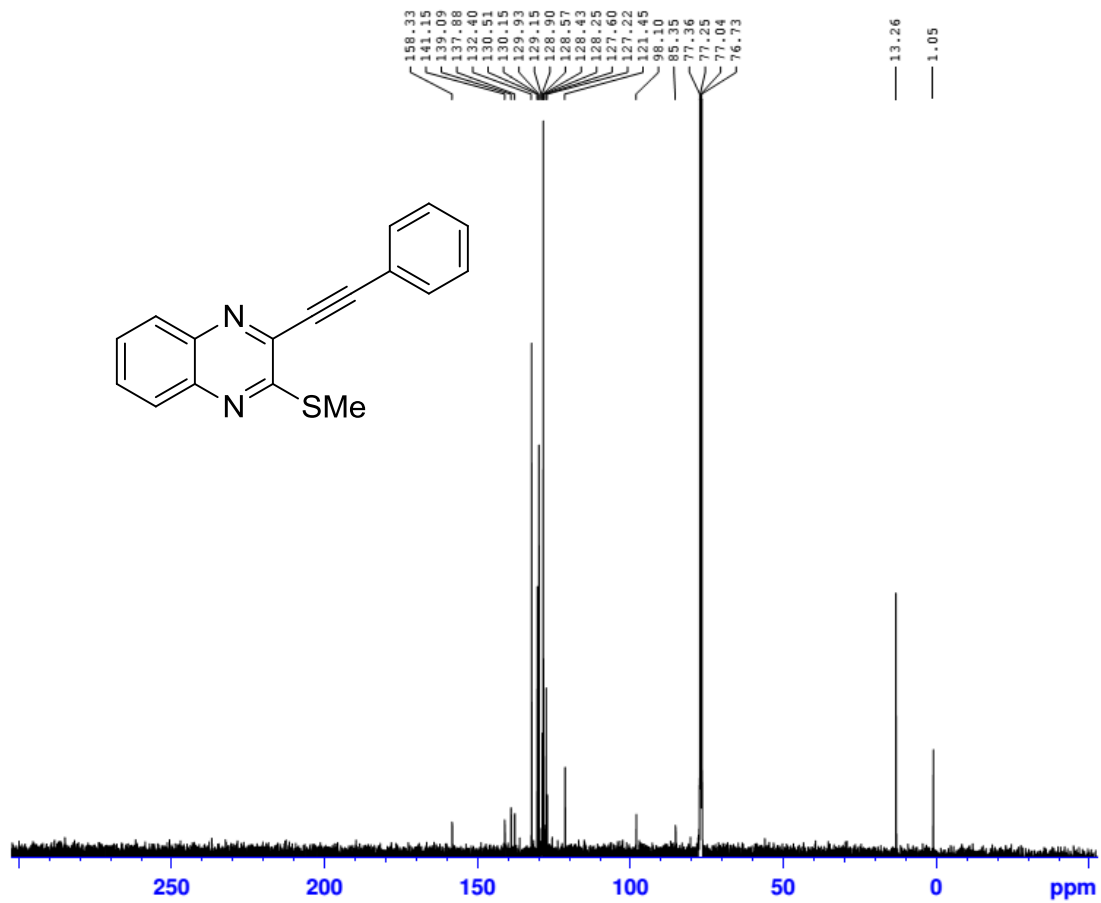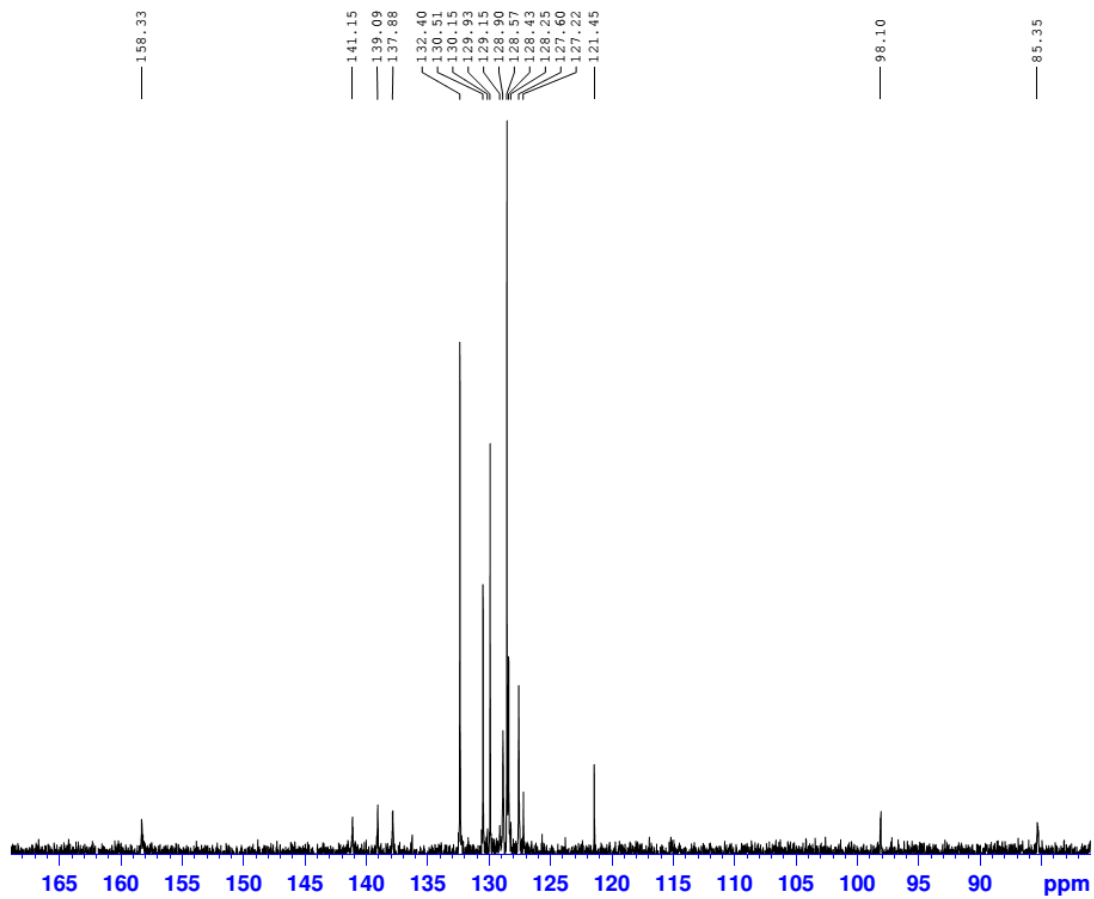

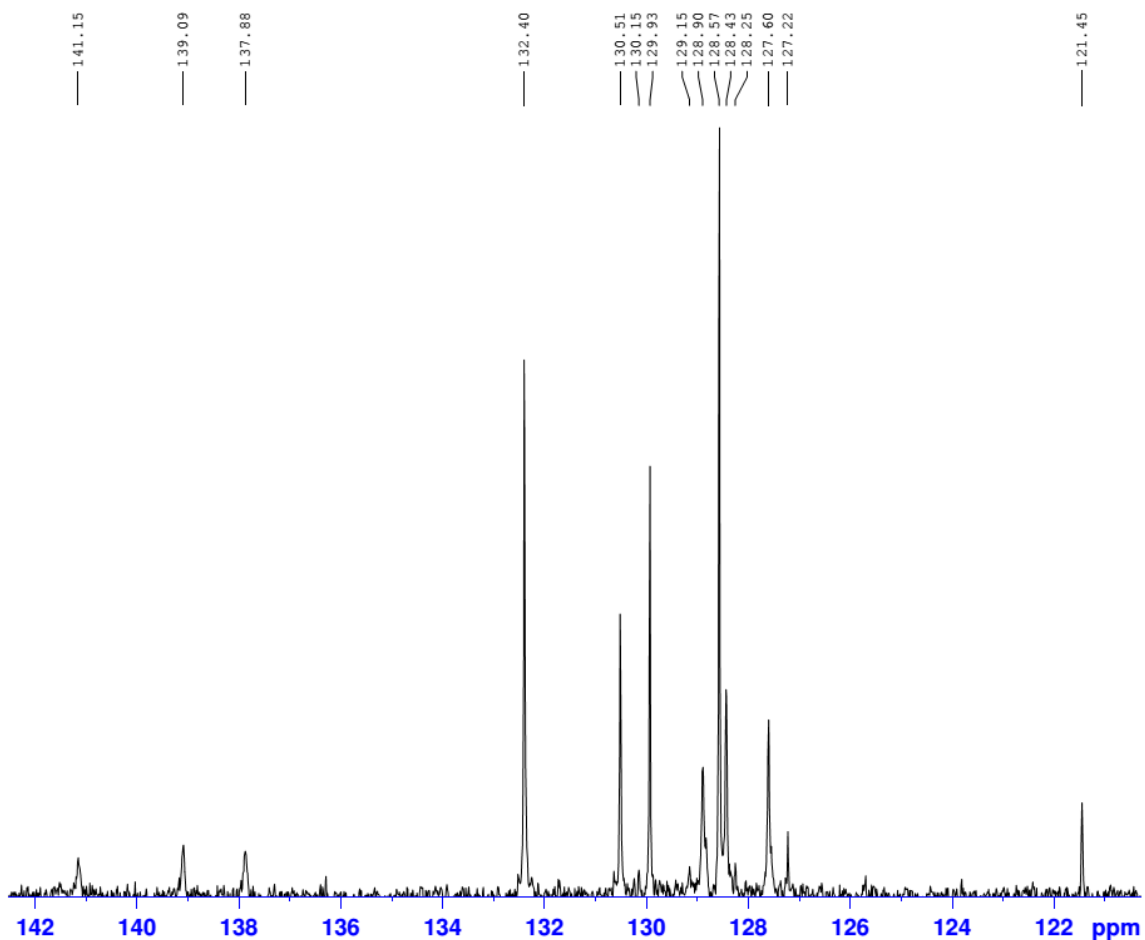

Figure 20:  $^{13}\text{C}$  NMR spectrum of **6**

Abundance

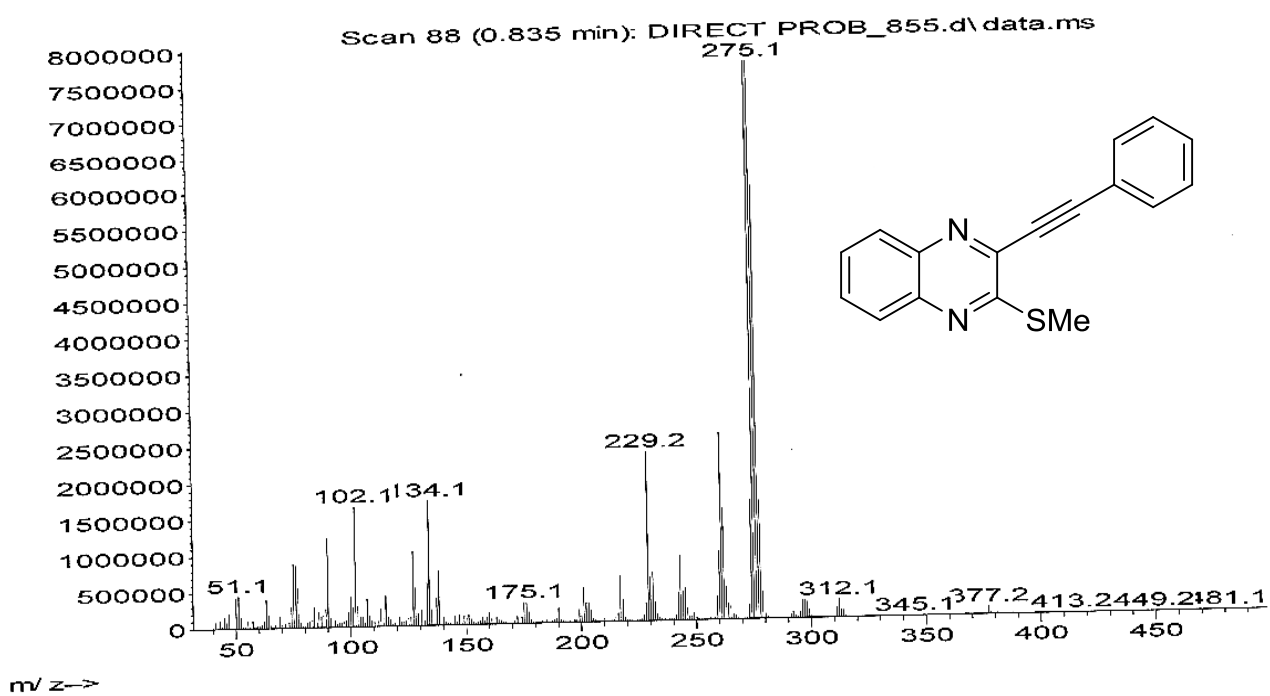

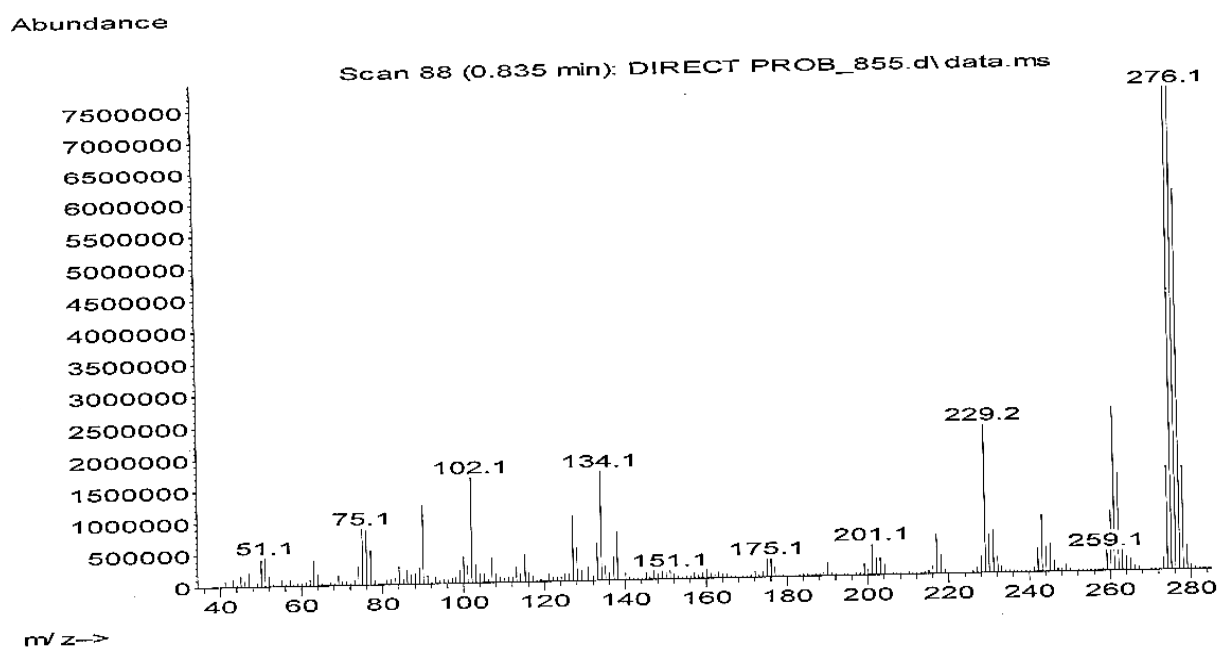

Figure 21: Mass spectrum of 6

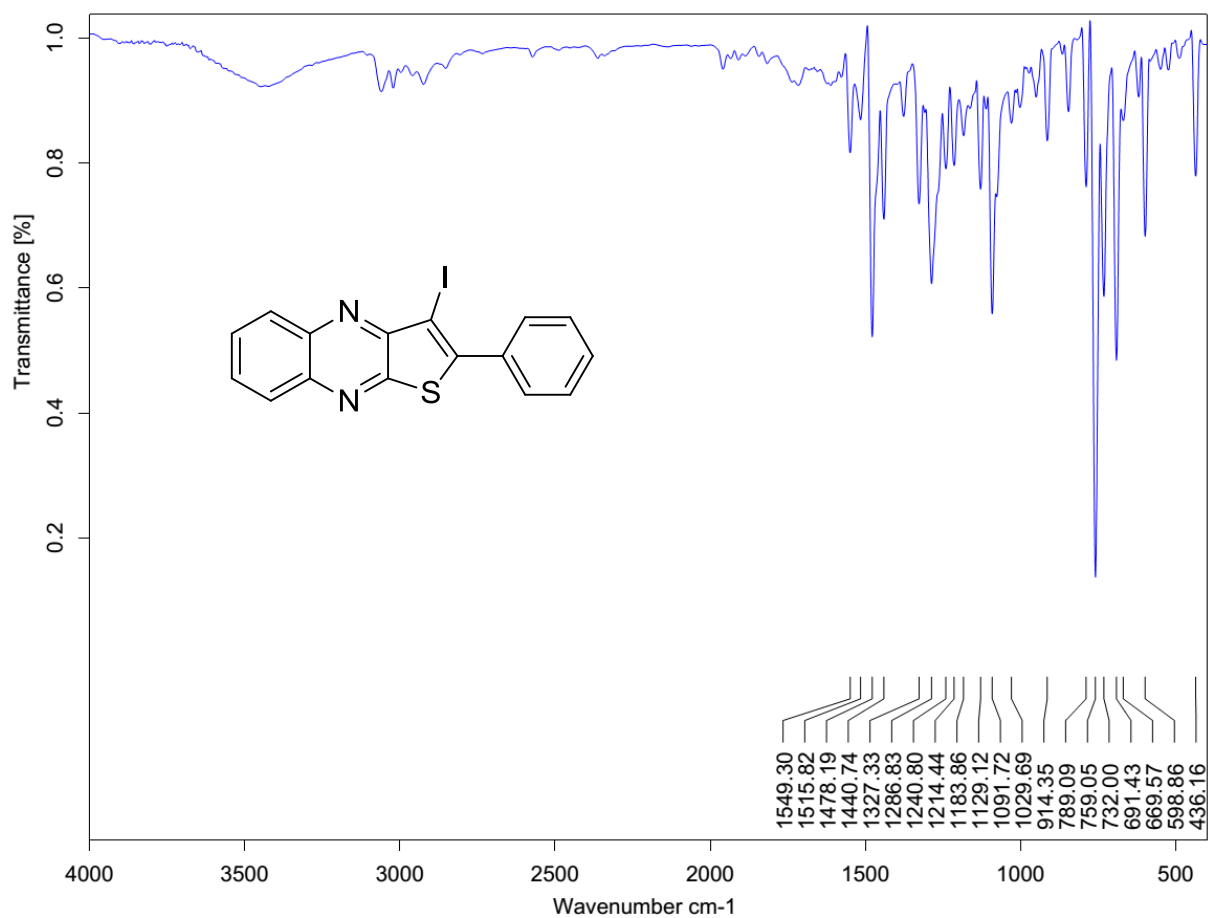

Figure 22: IR spectrum of 7

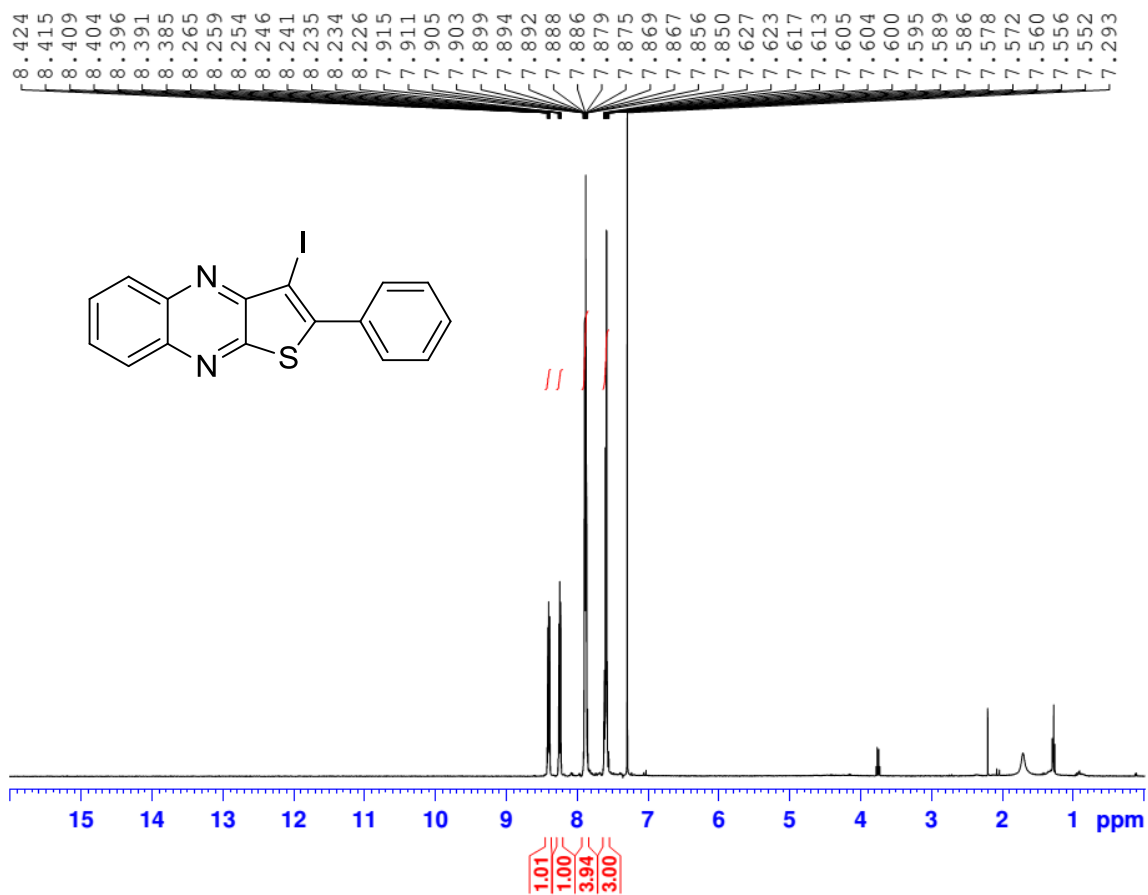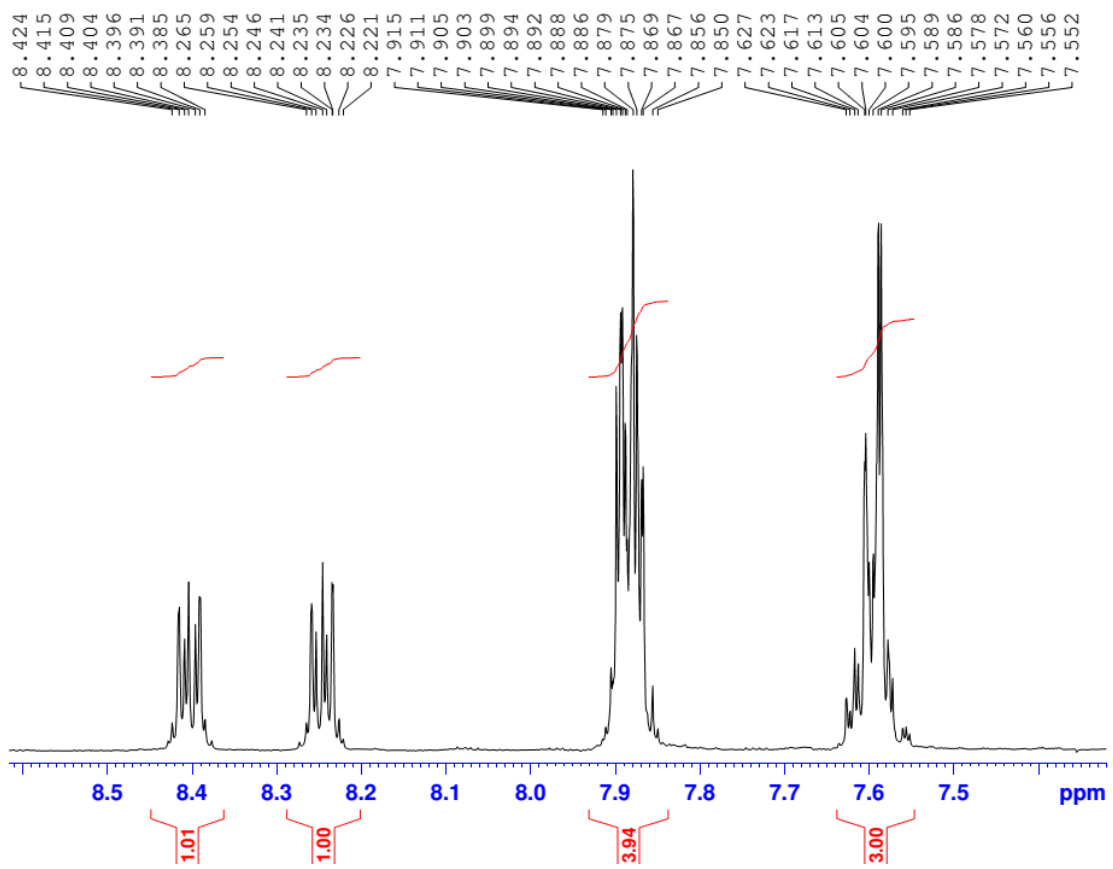

Figure 23: <sup>1</sup>H NMR spectrum of 7

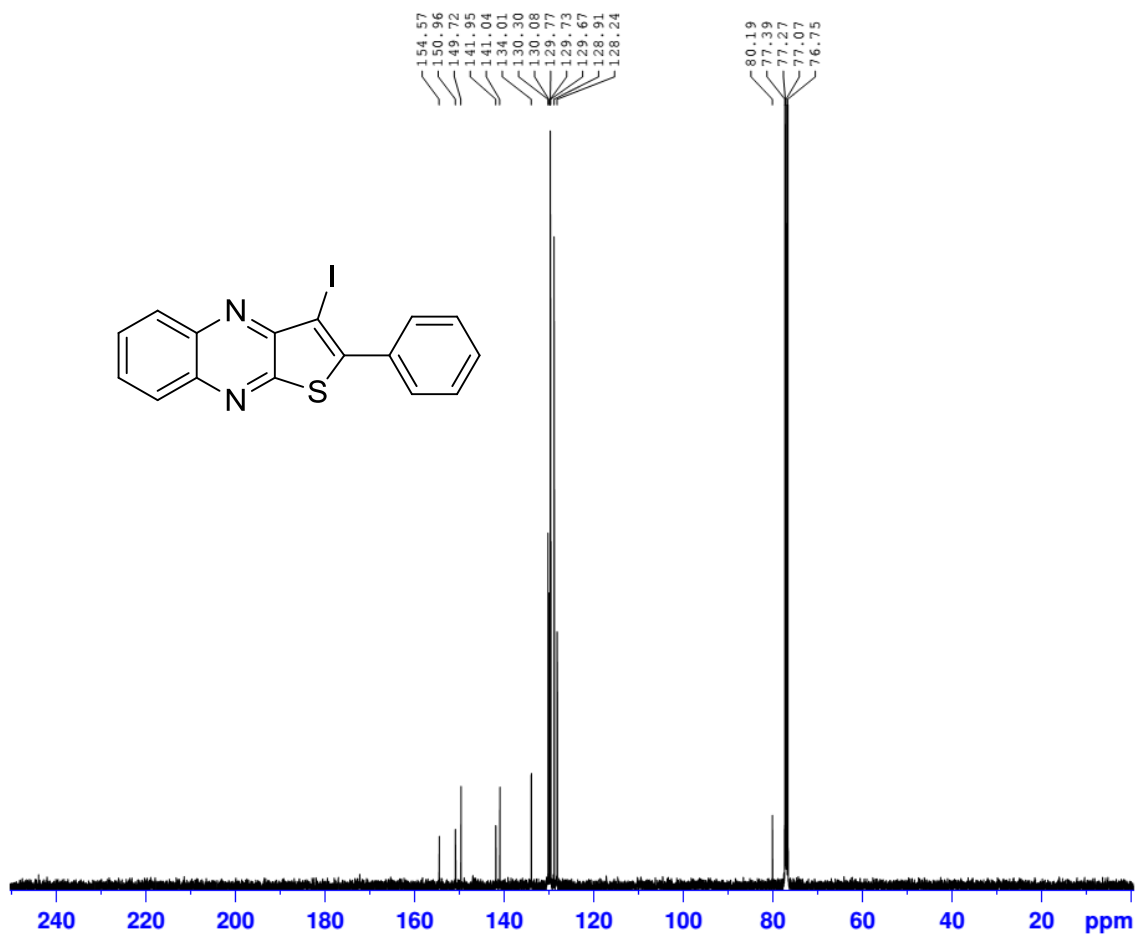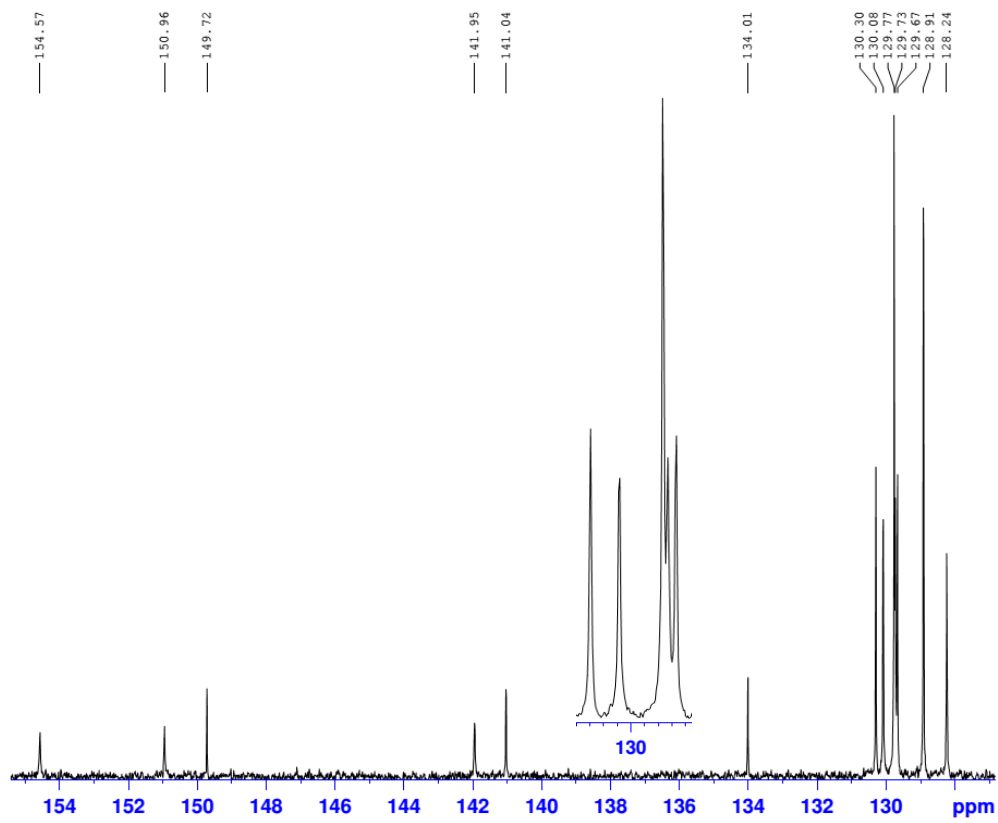

Figure 24: <sup>13</sup>C NMR spectrum of 7

Abundance

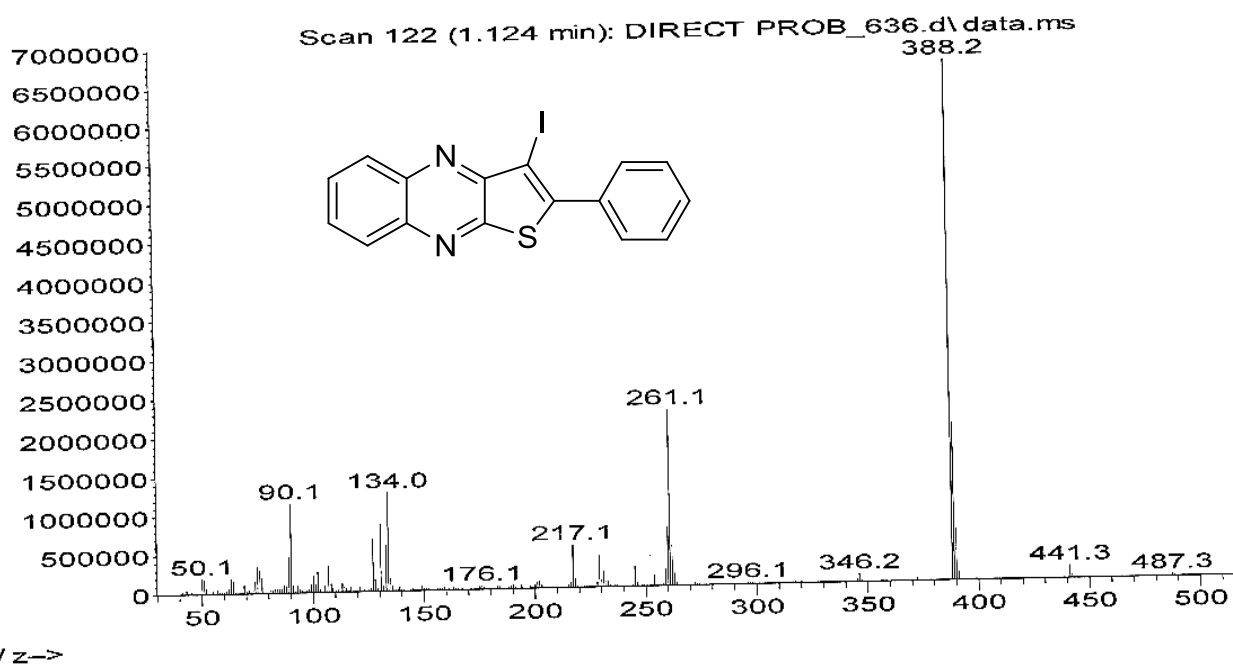

Abundance

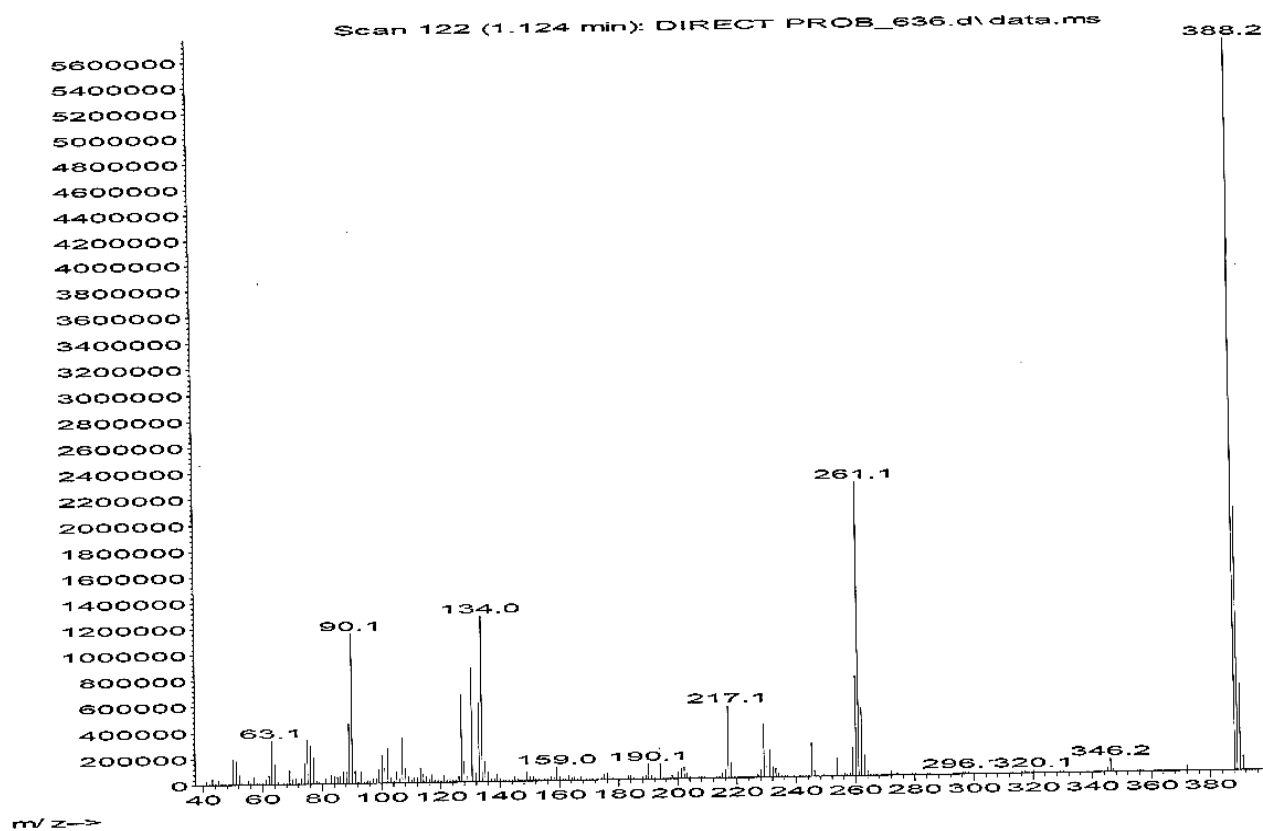

Figure 25: Mass spectrum of 7

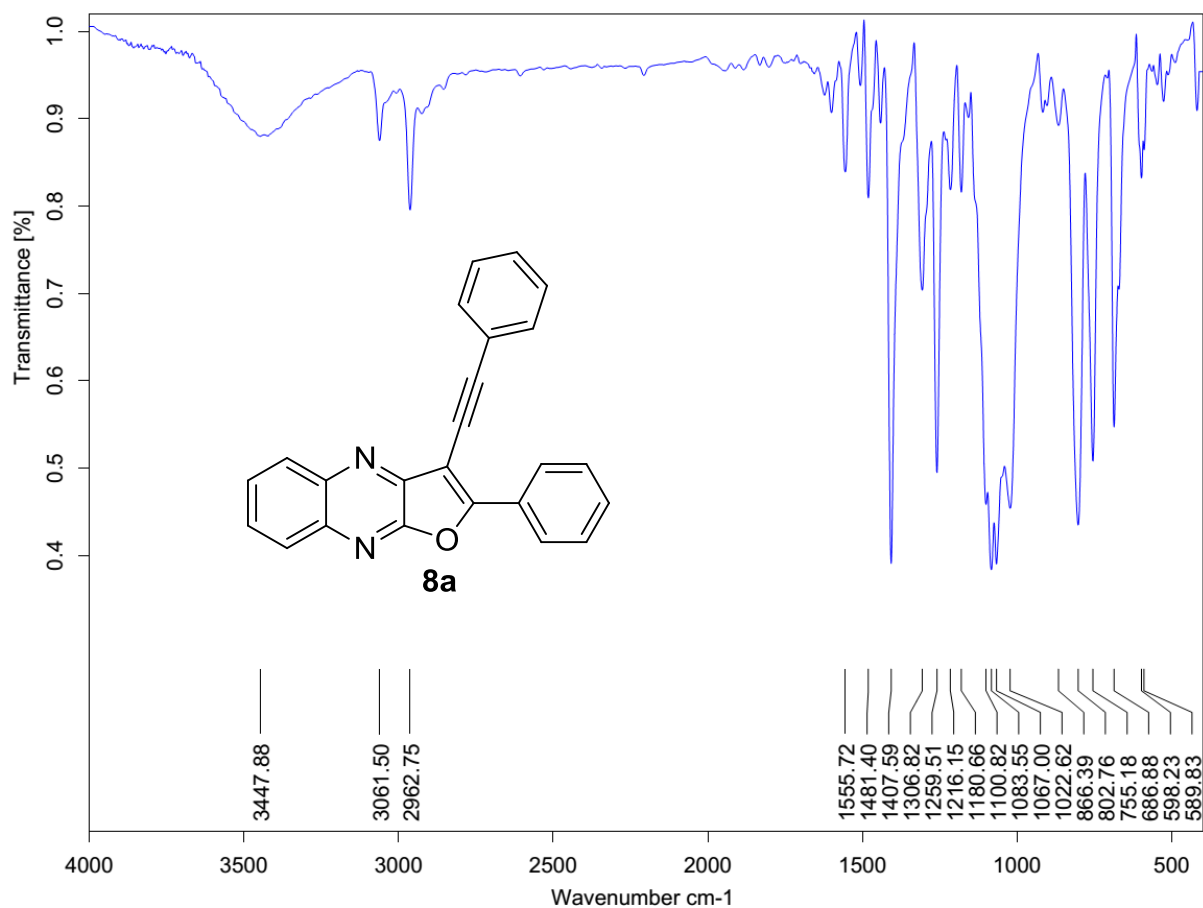

**Figure 26: IR spectrum of 8a**

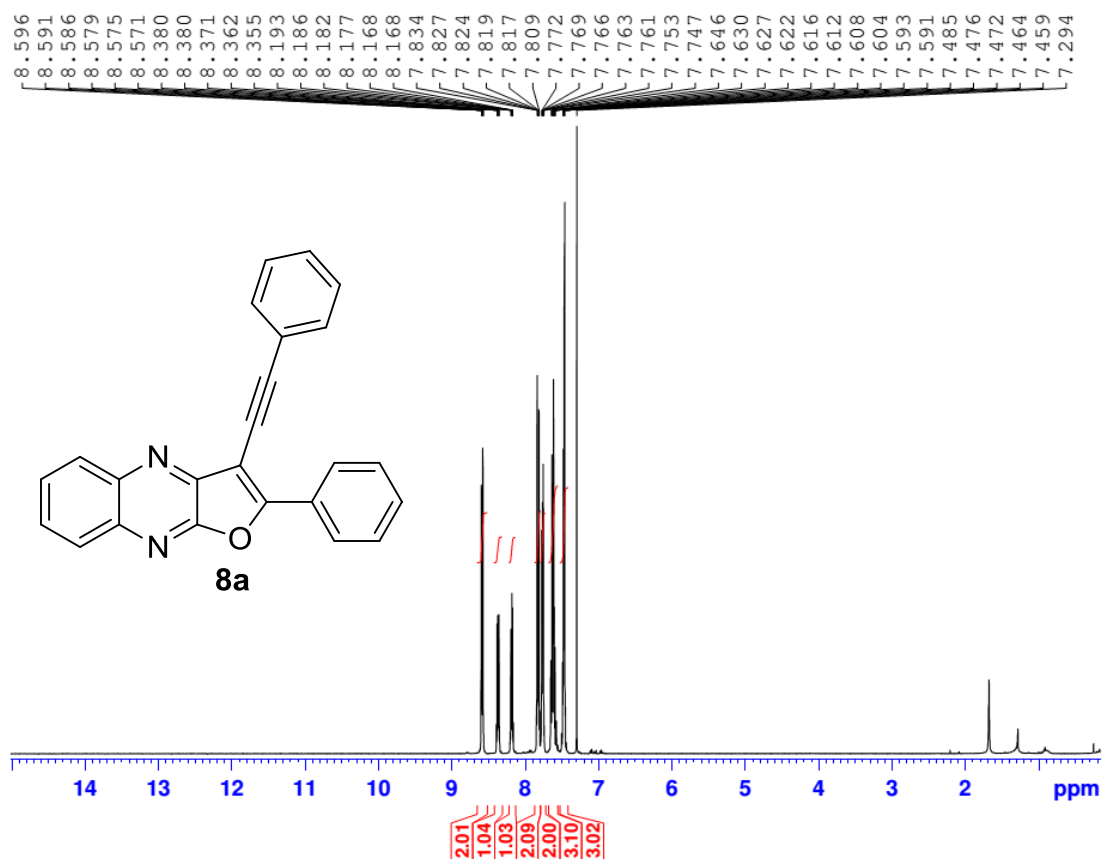



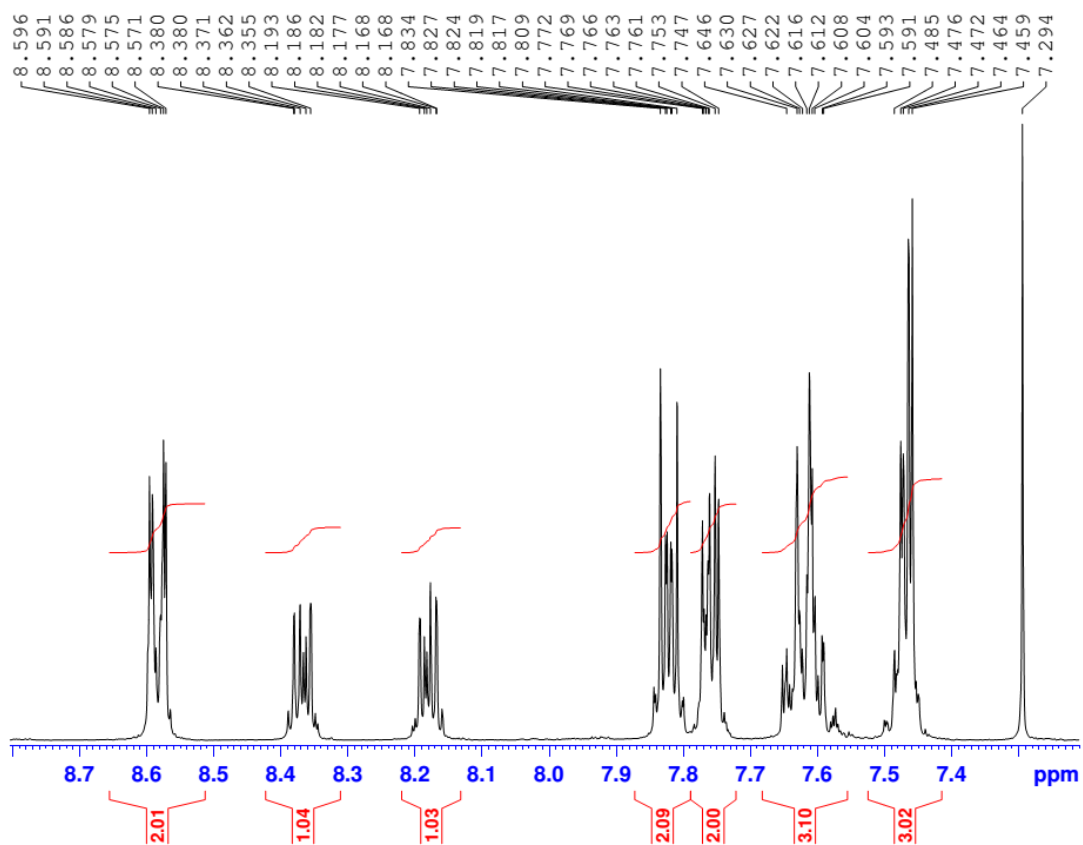

Figure 27: <sup>1</sup>H NMR spectrum of **8a**

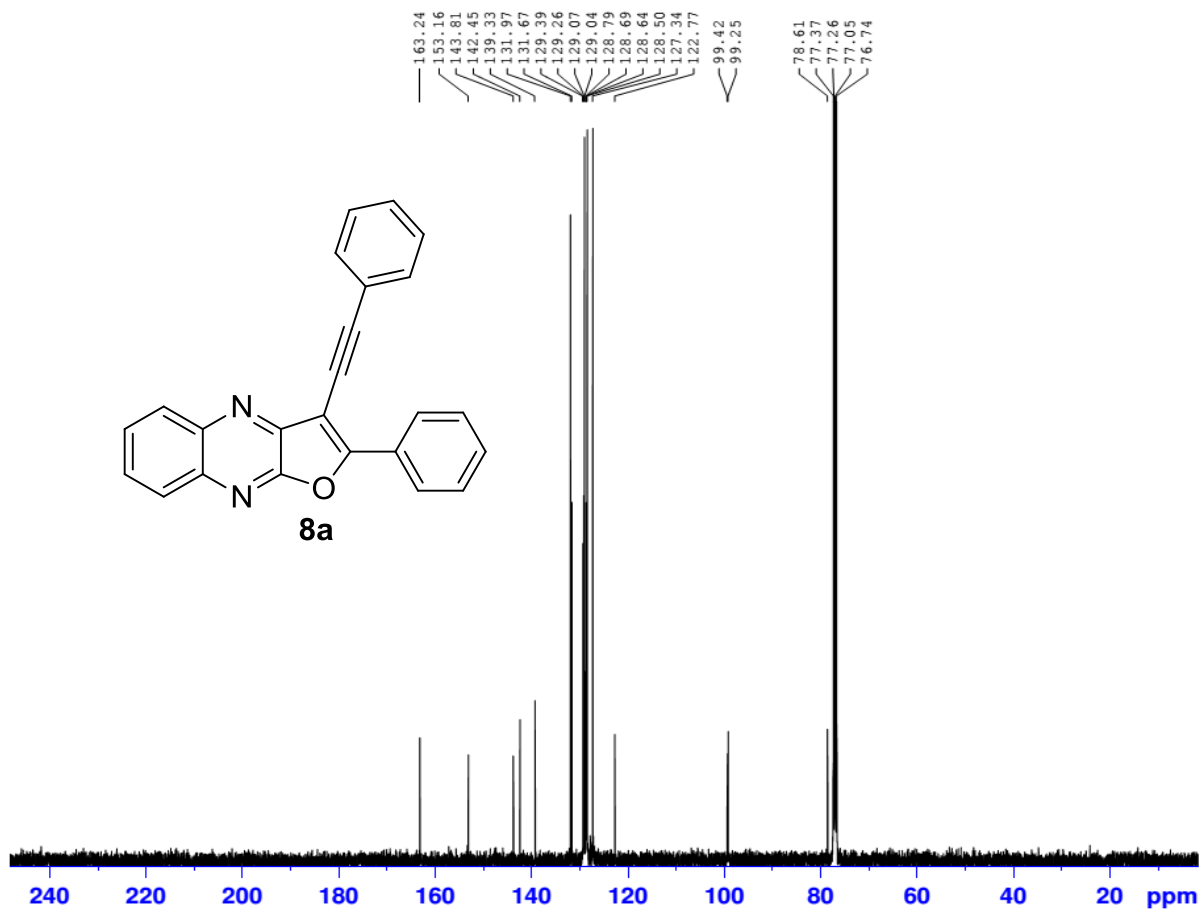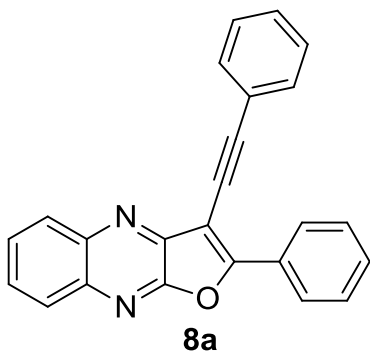

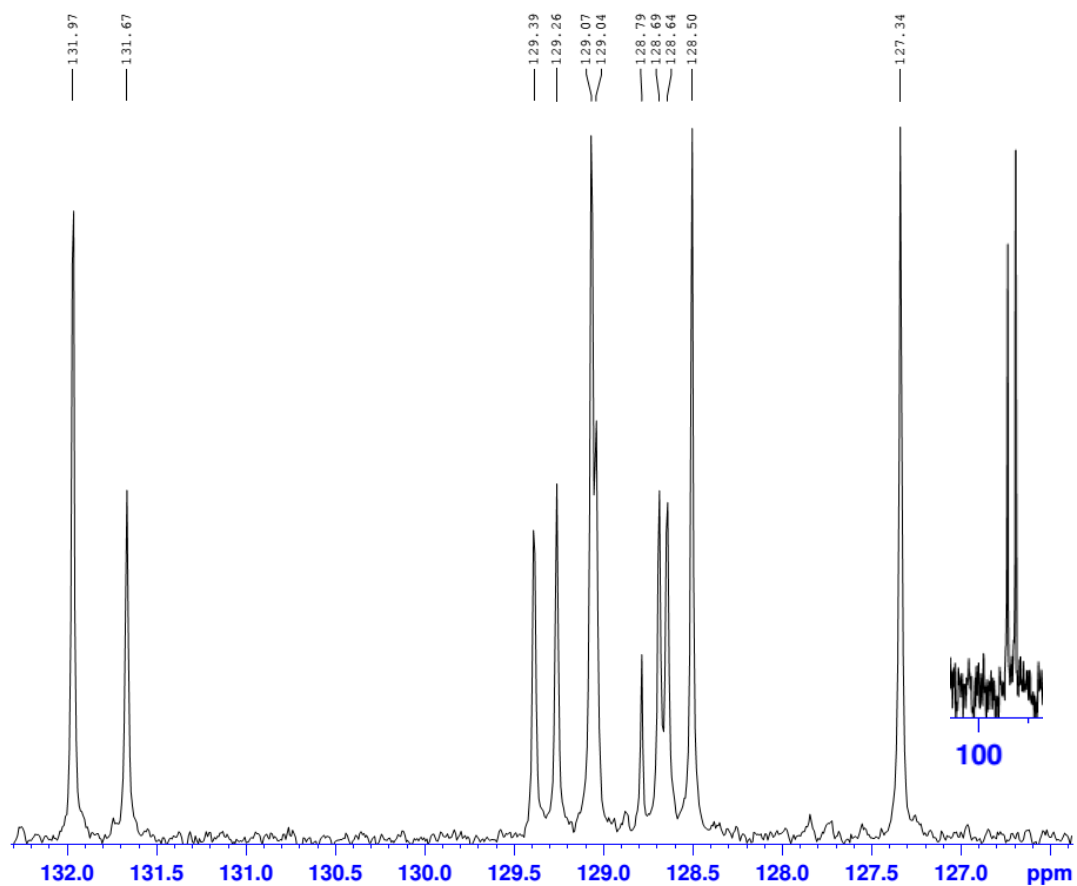

Figure 28:  $^{13}\text{C}$  NMR spectrum of **8a**

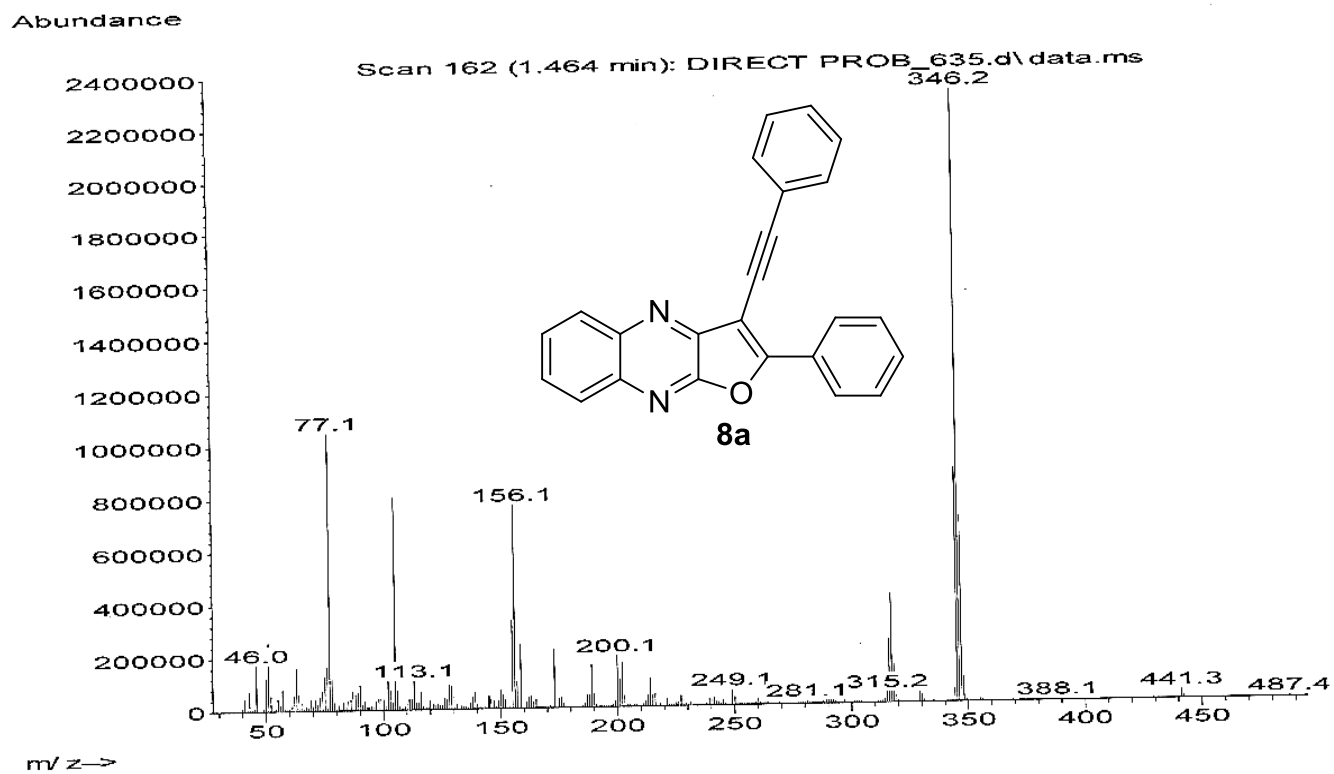

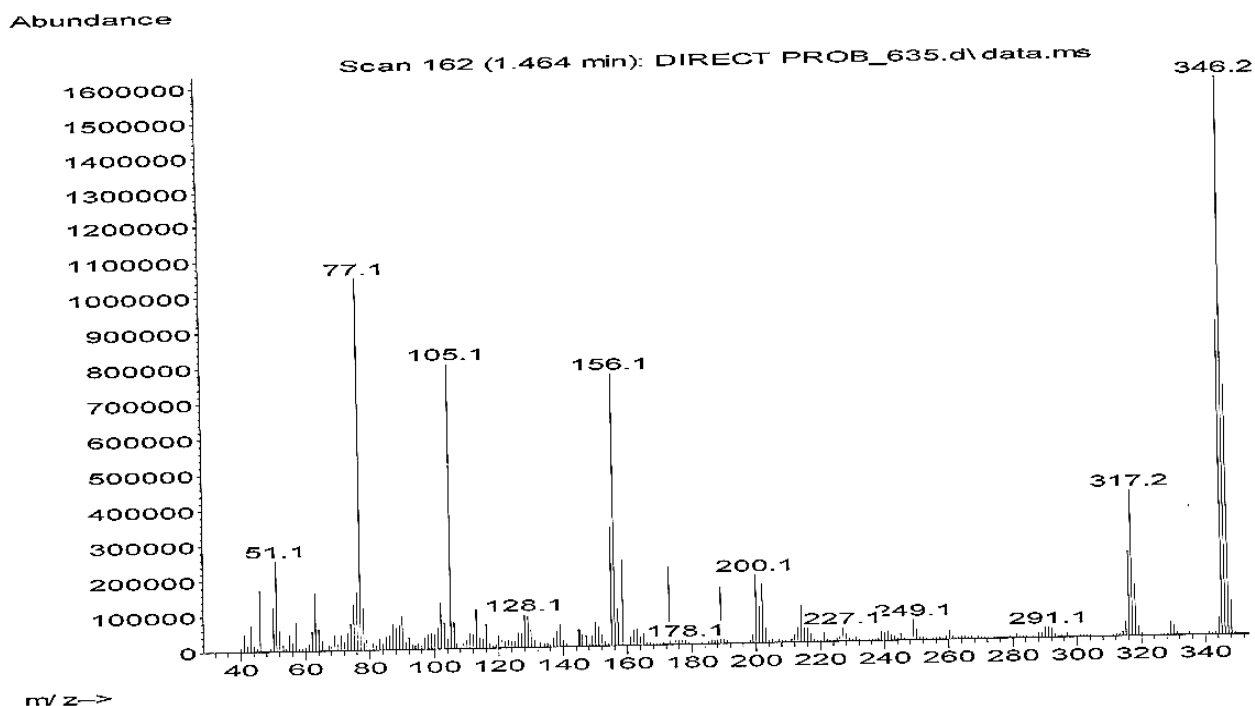

Figure 29: Mass spectrum of 8a

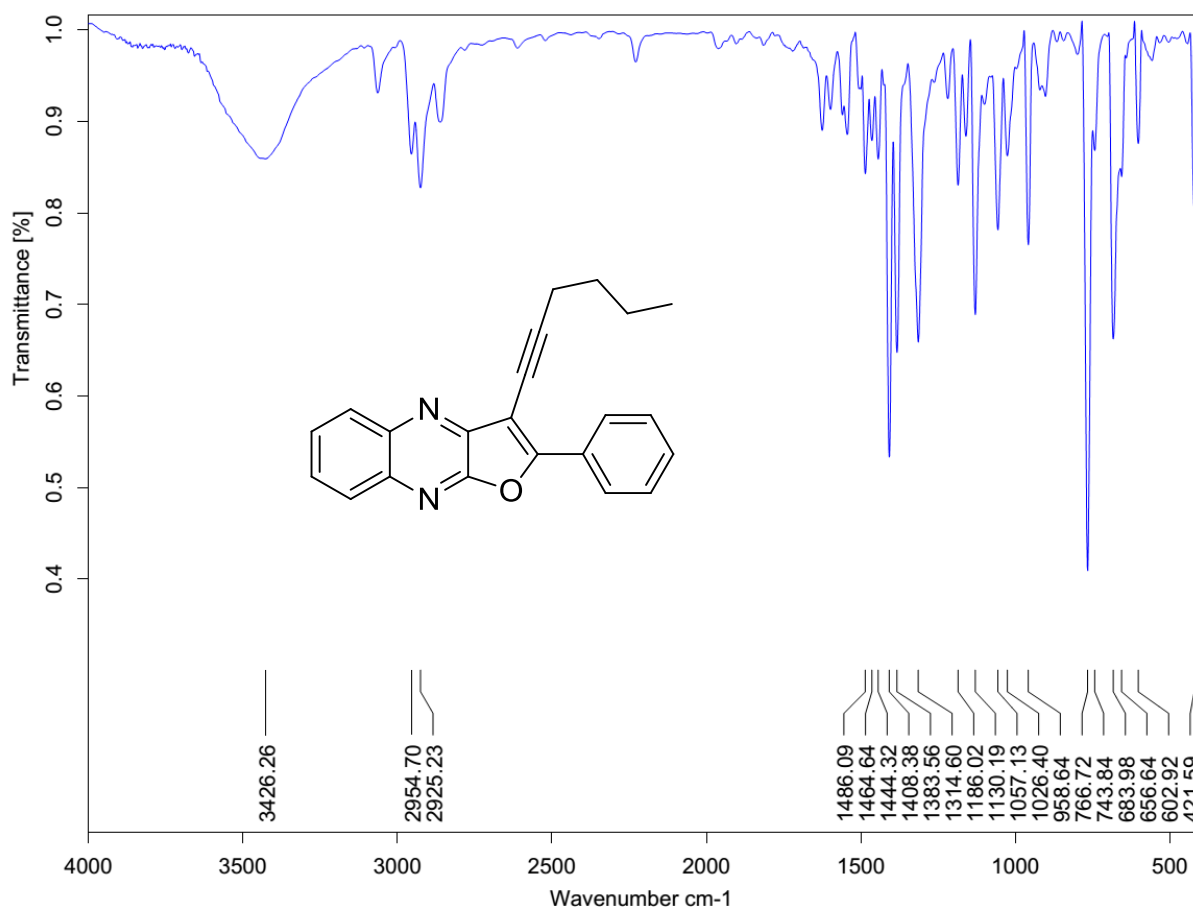

Figure 30: IR spectrum of 8b

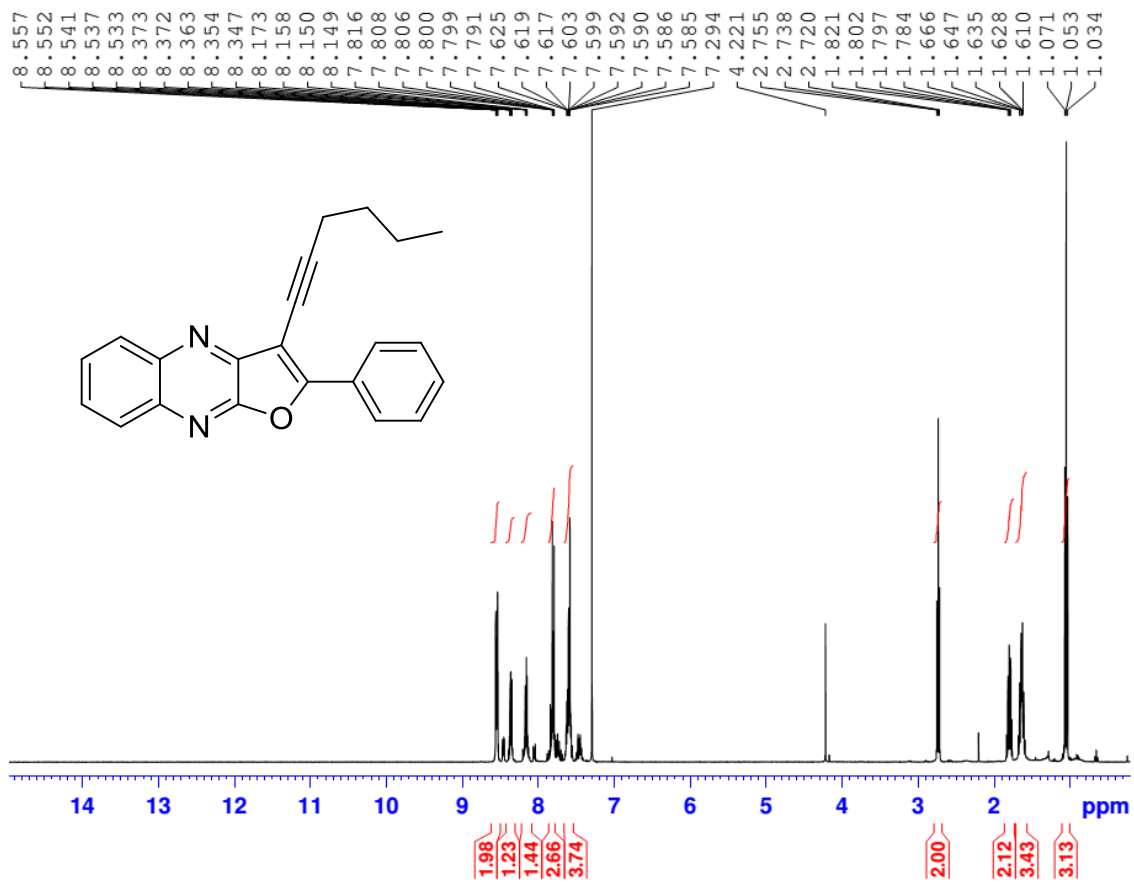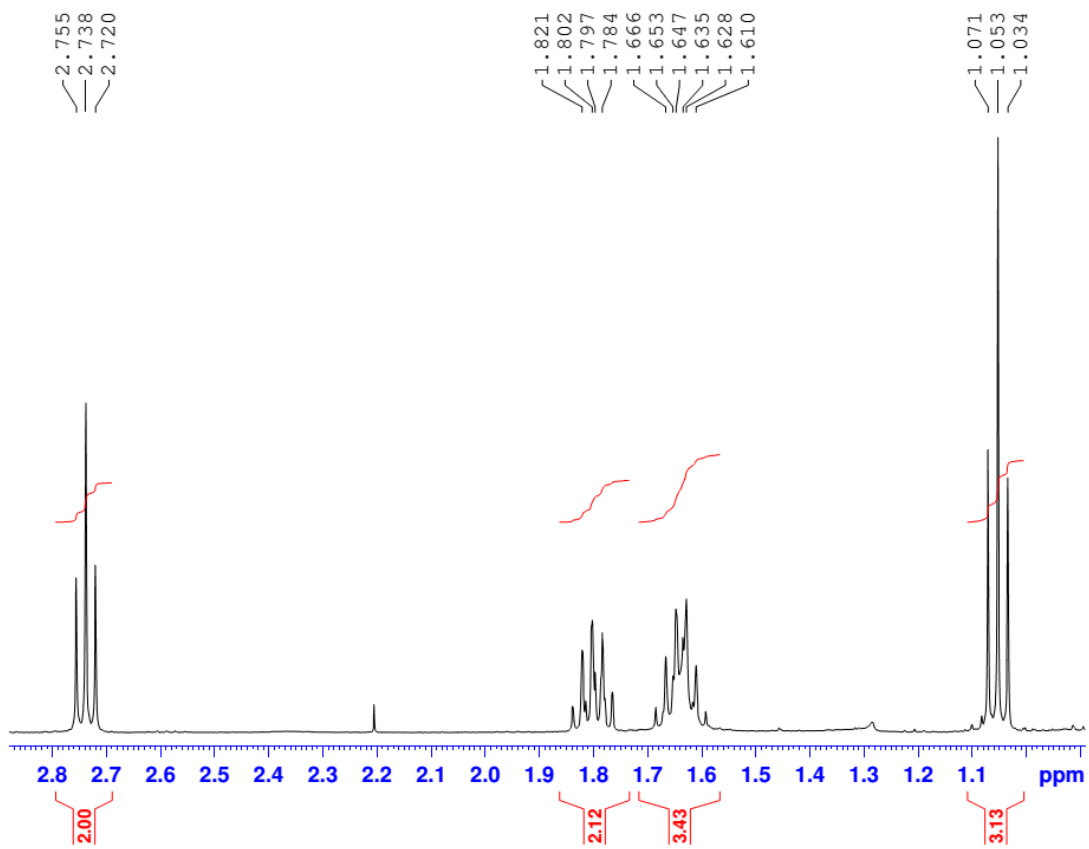

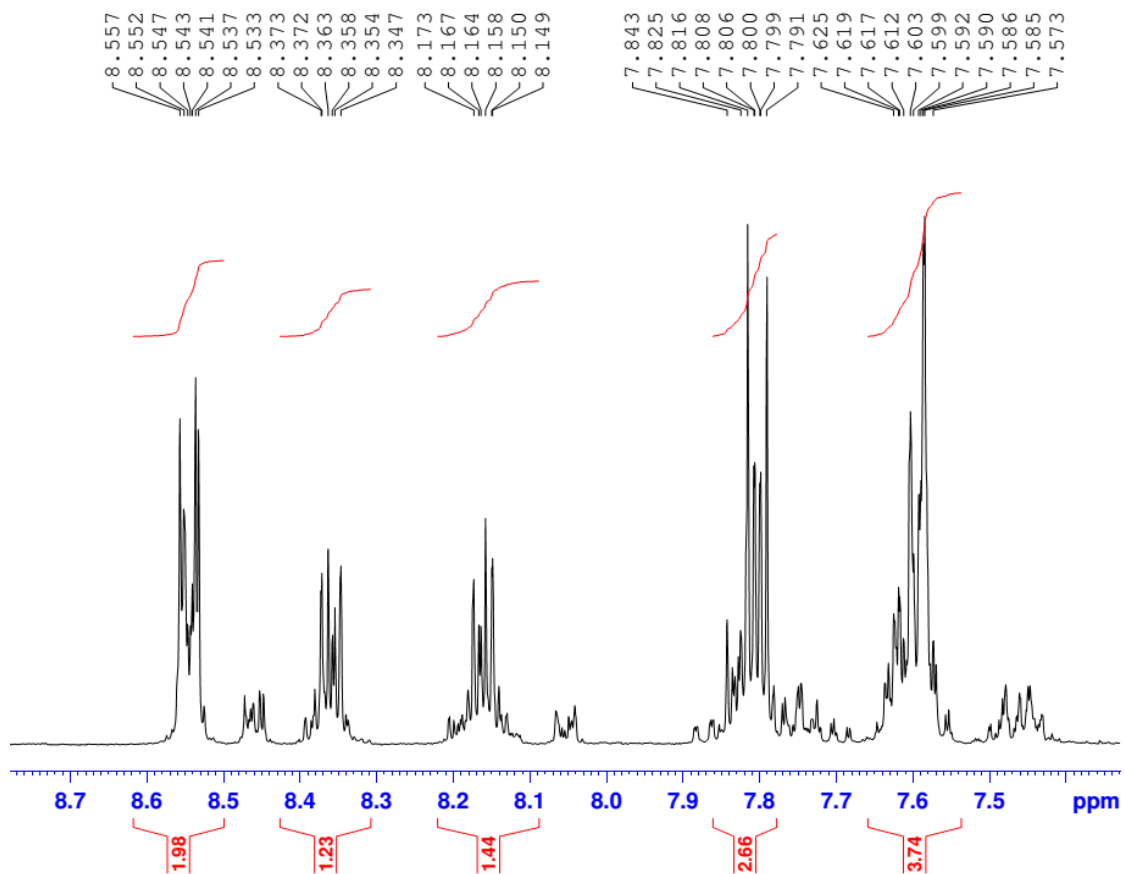

Figure 31:  $^1\text{H}$  NMR spectrum of **8b**

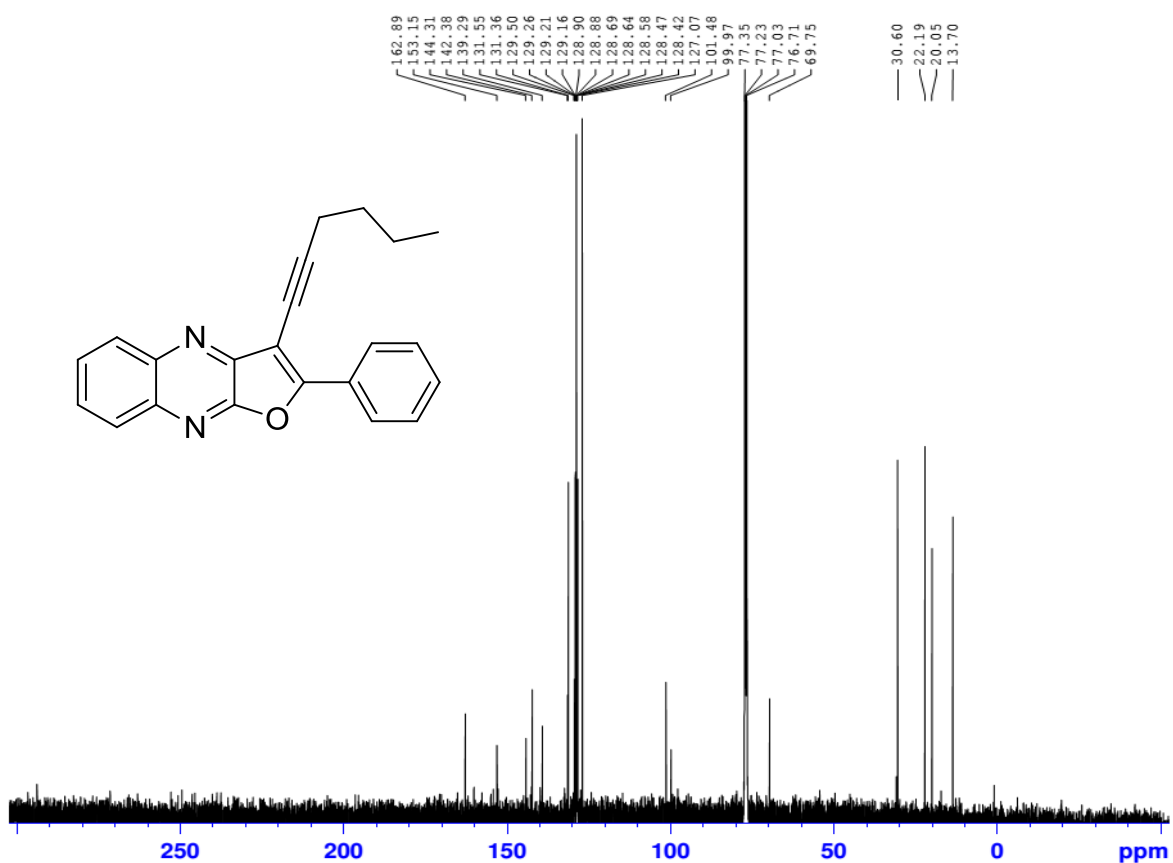

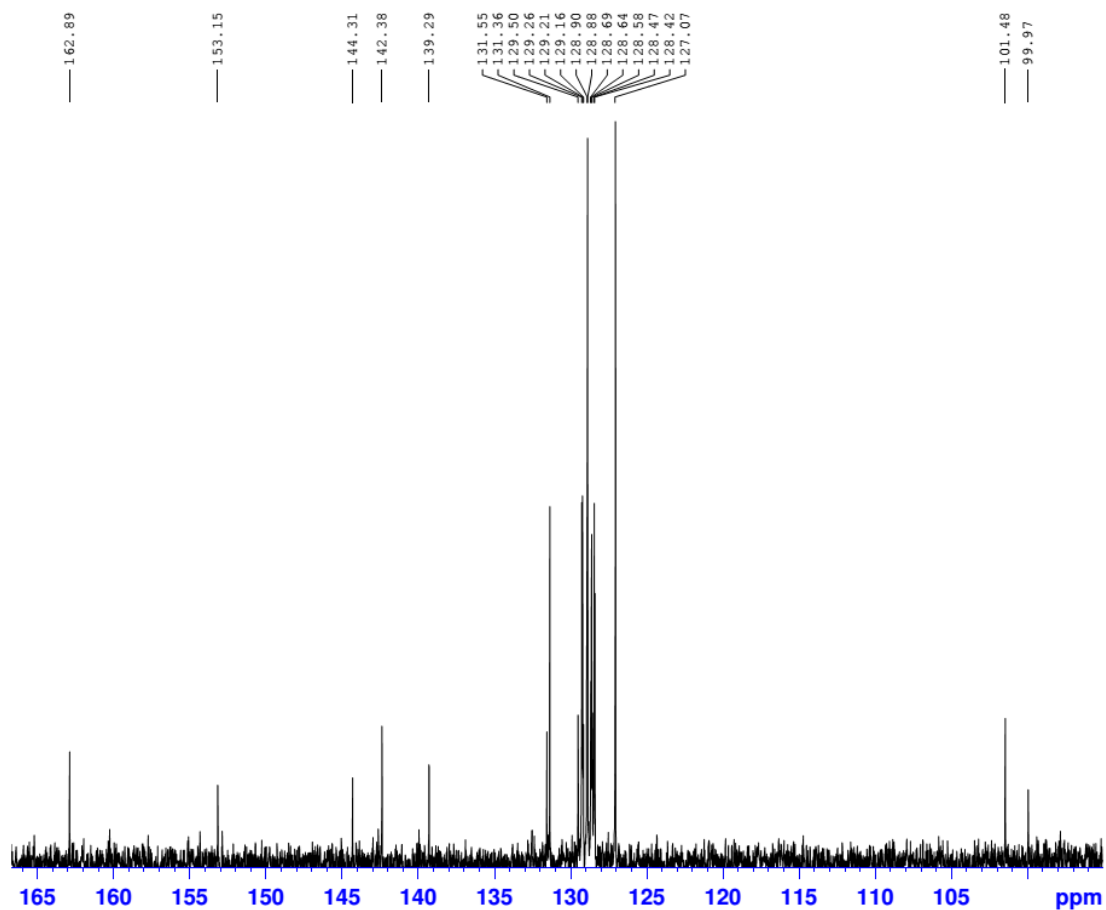

Figure 32:  $^{13}\text{C}$  NMR spectrum of **8b**

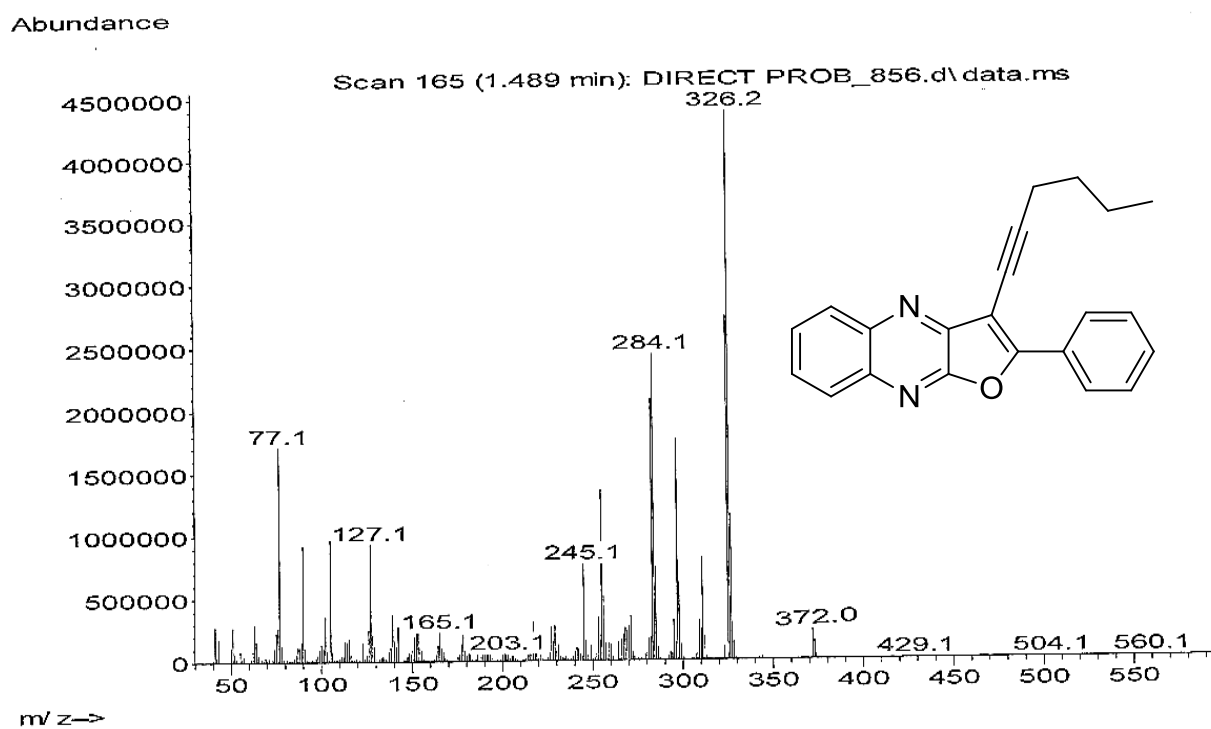

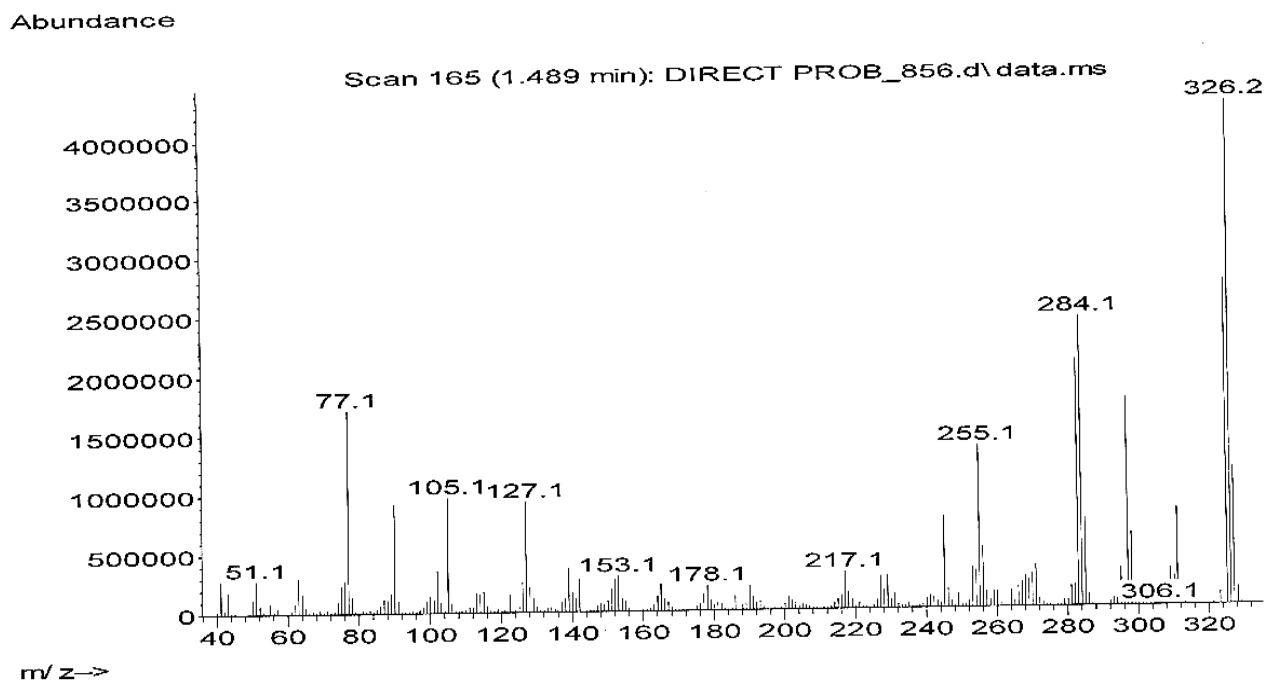

Figure 33: Mass spectrum of 8b

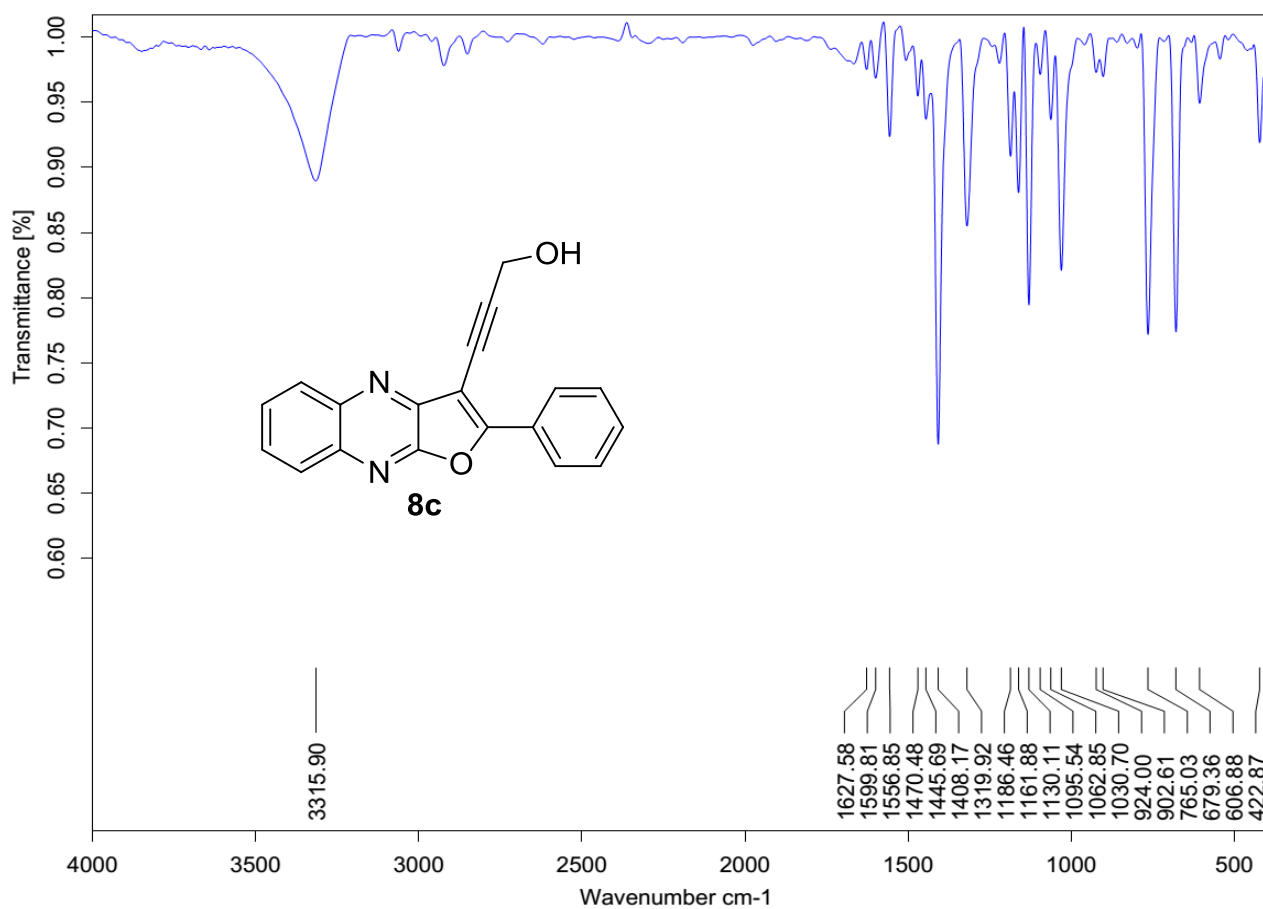

Figure 34: IR spectrum of 8c

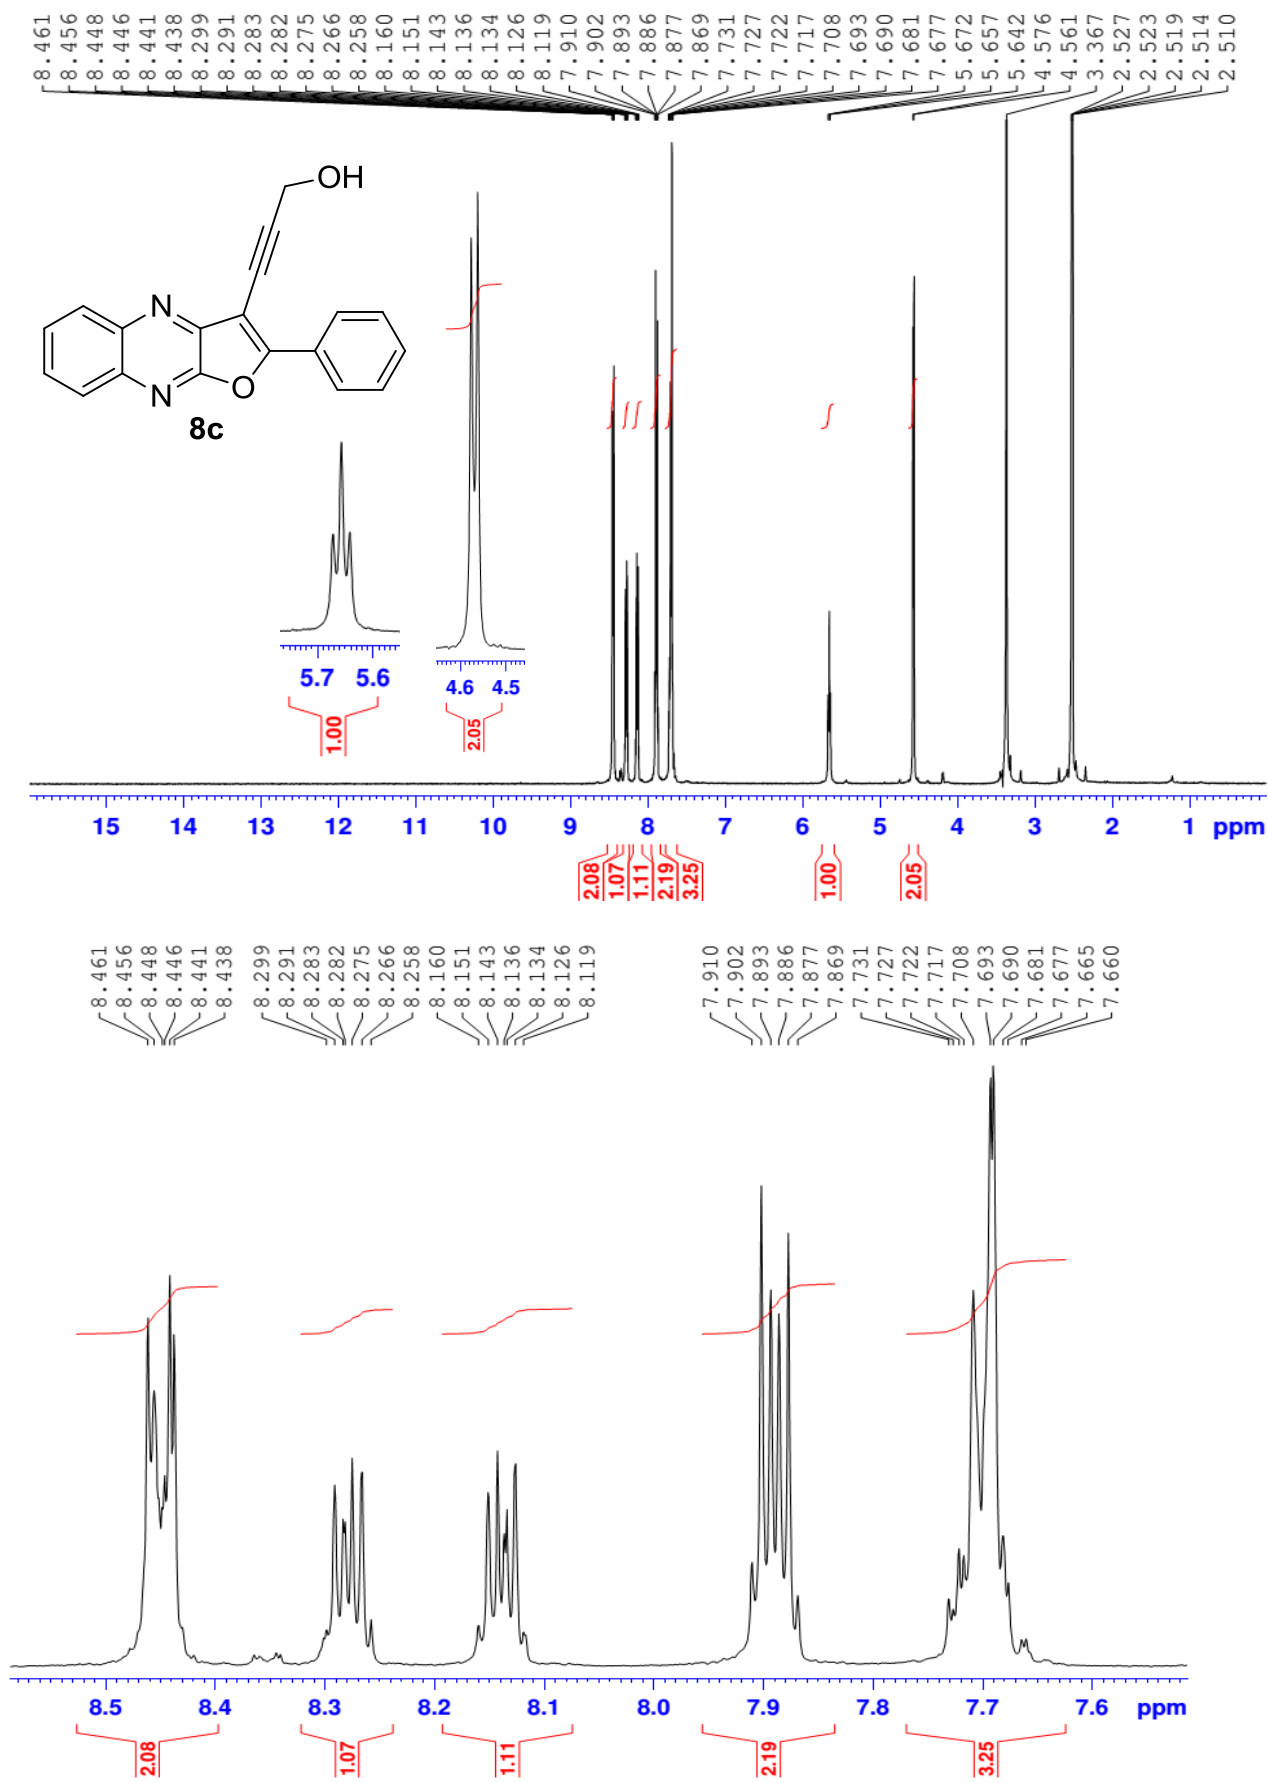

Figure 35:  $^1\text{H}$  NMR spectrum of **8c**



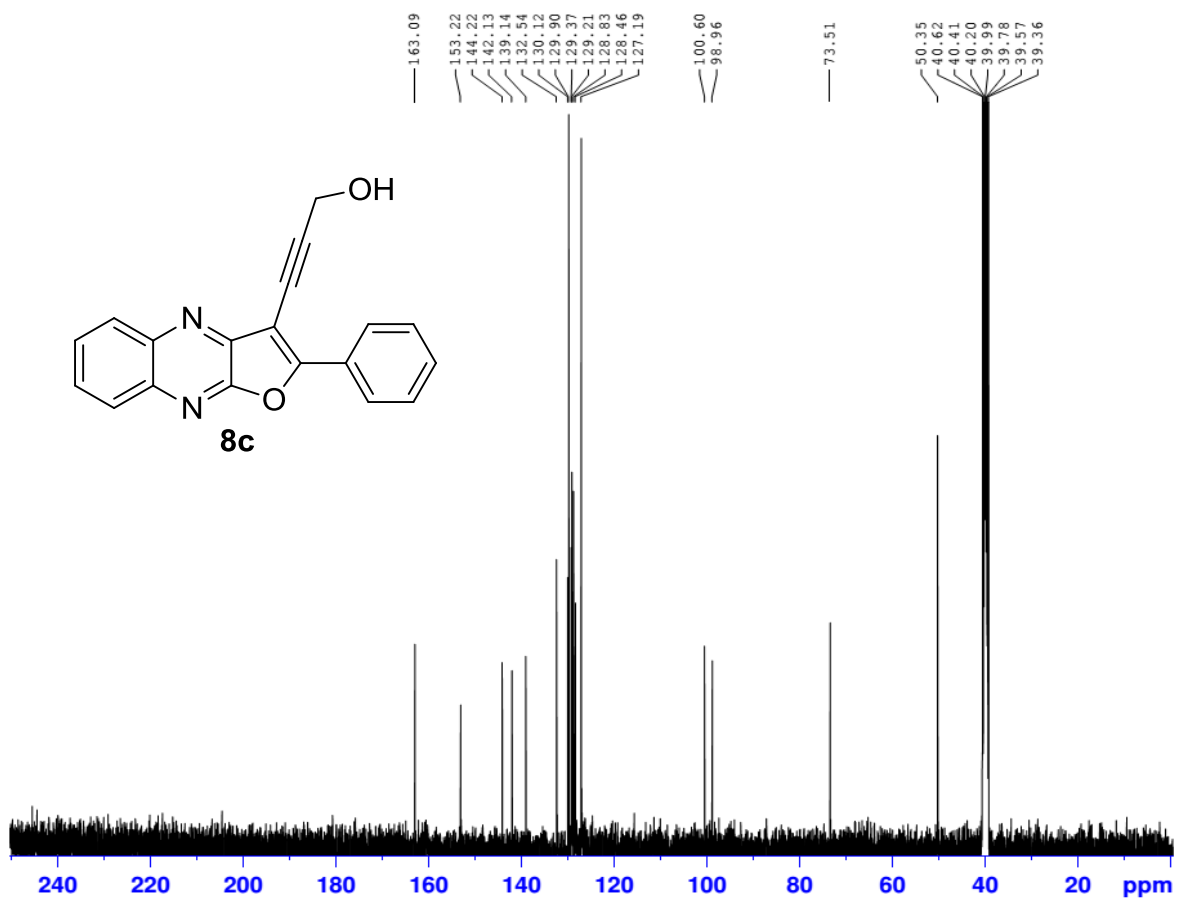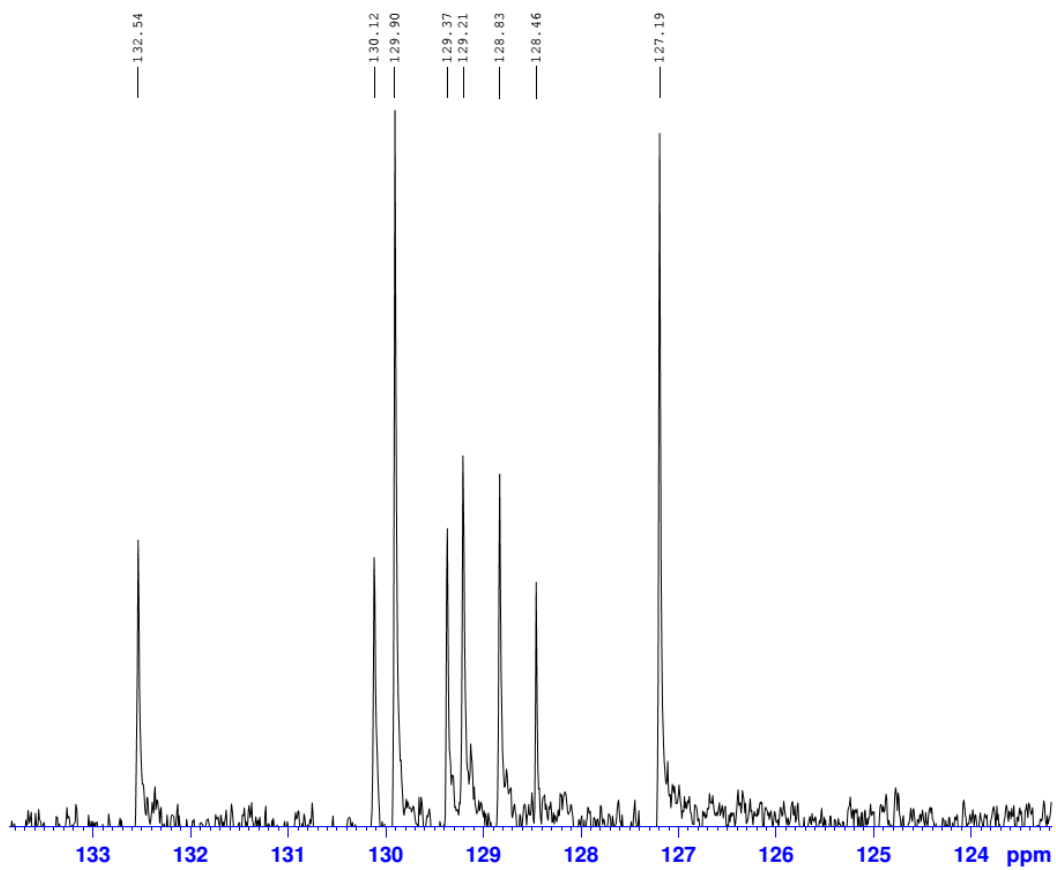

Figure 36: <sup>13</sup>C NMR spectrum of **8c**

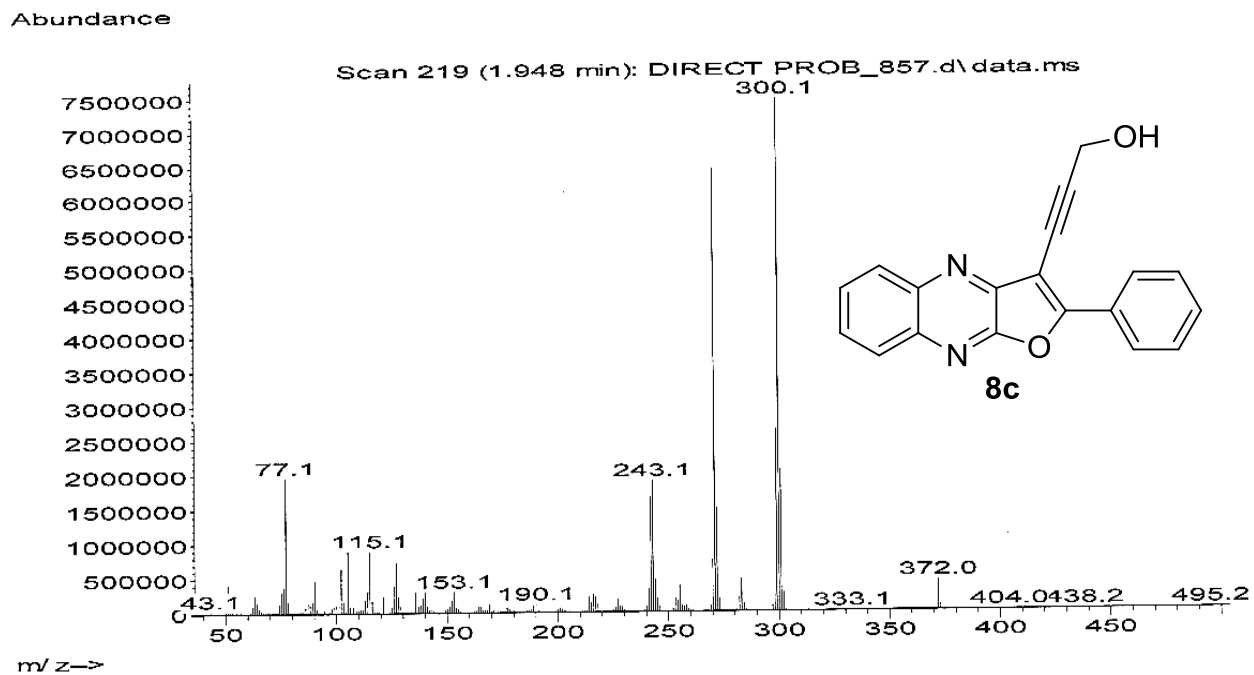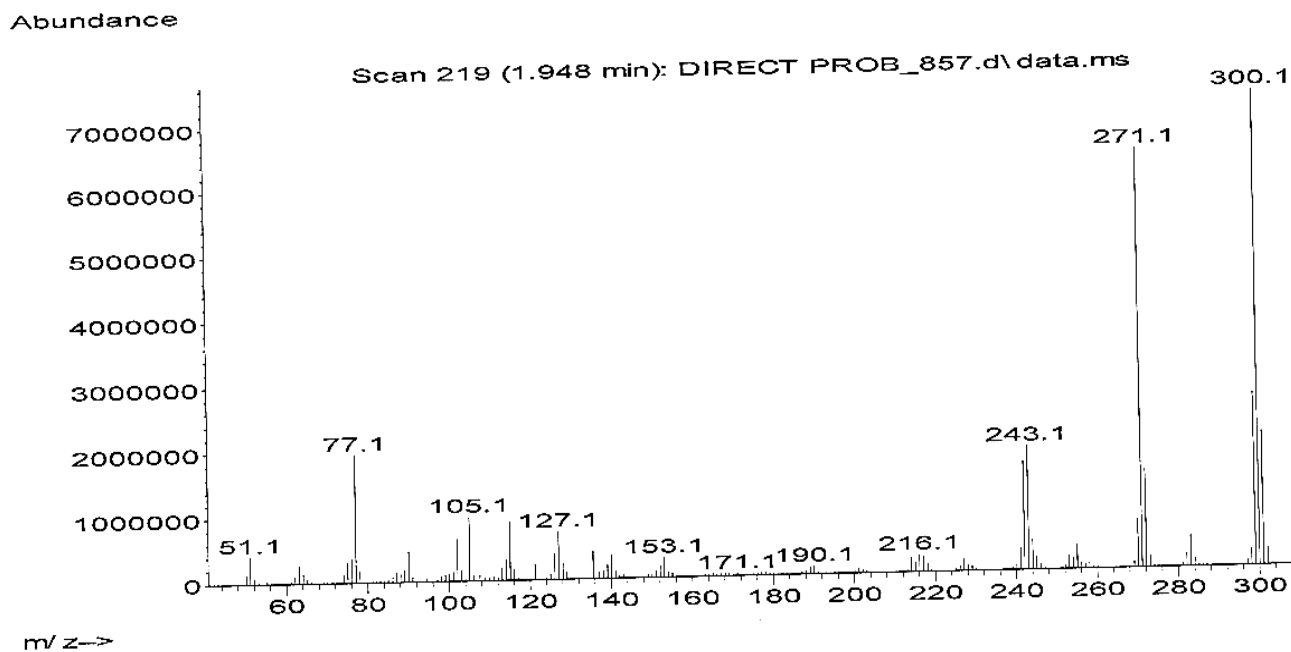

**Figure 37:** Mass spectrum of **8c**

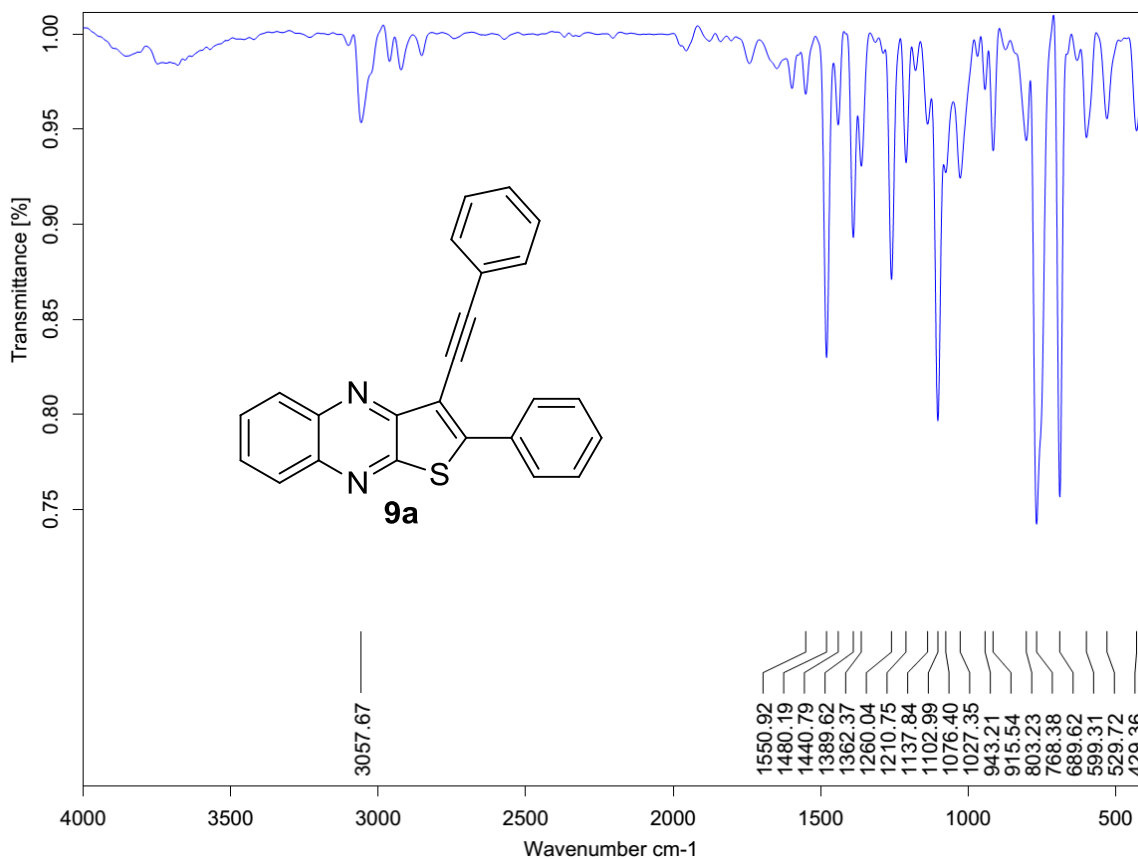

Figure 38: IR spectrum of **9a**

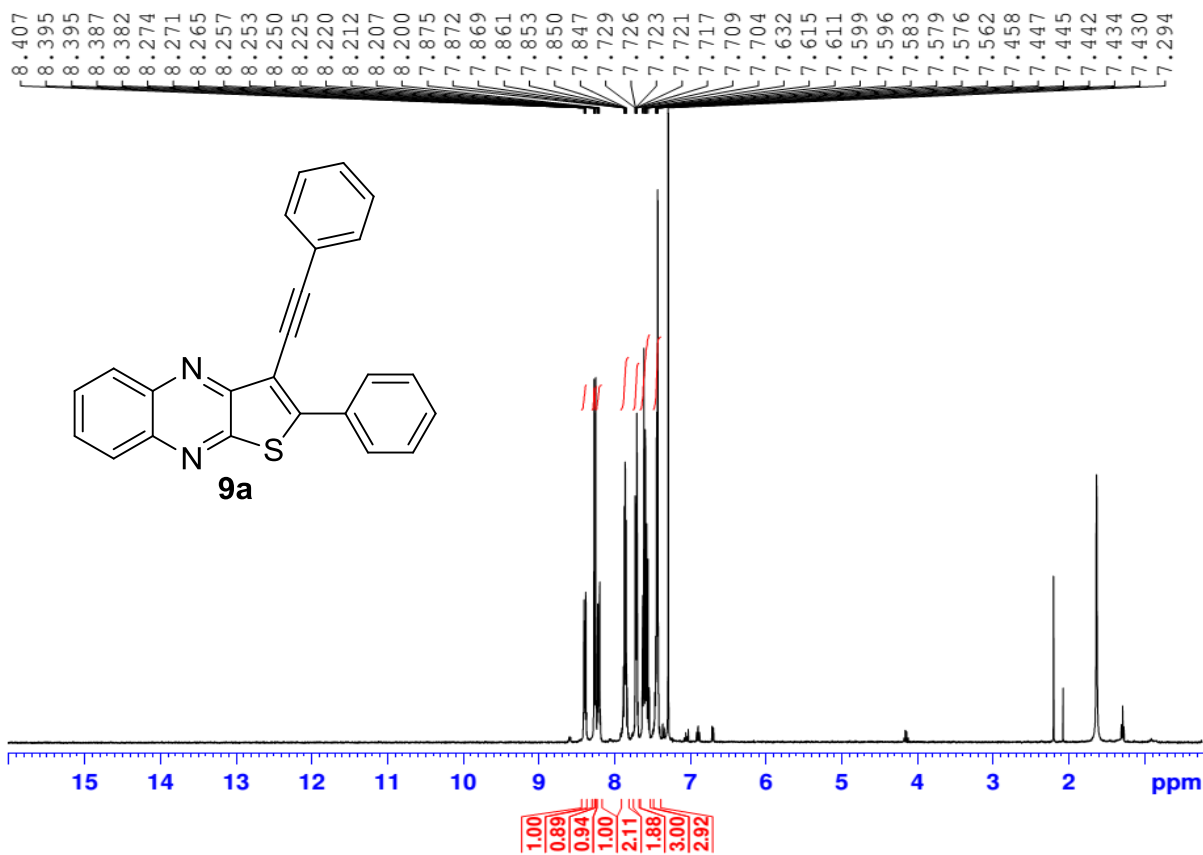

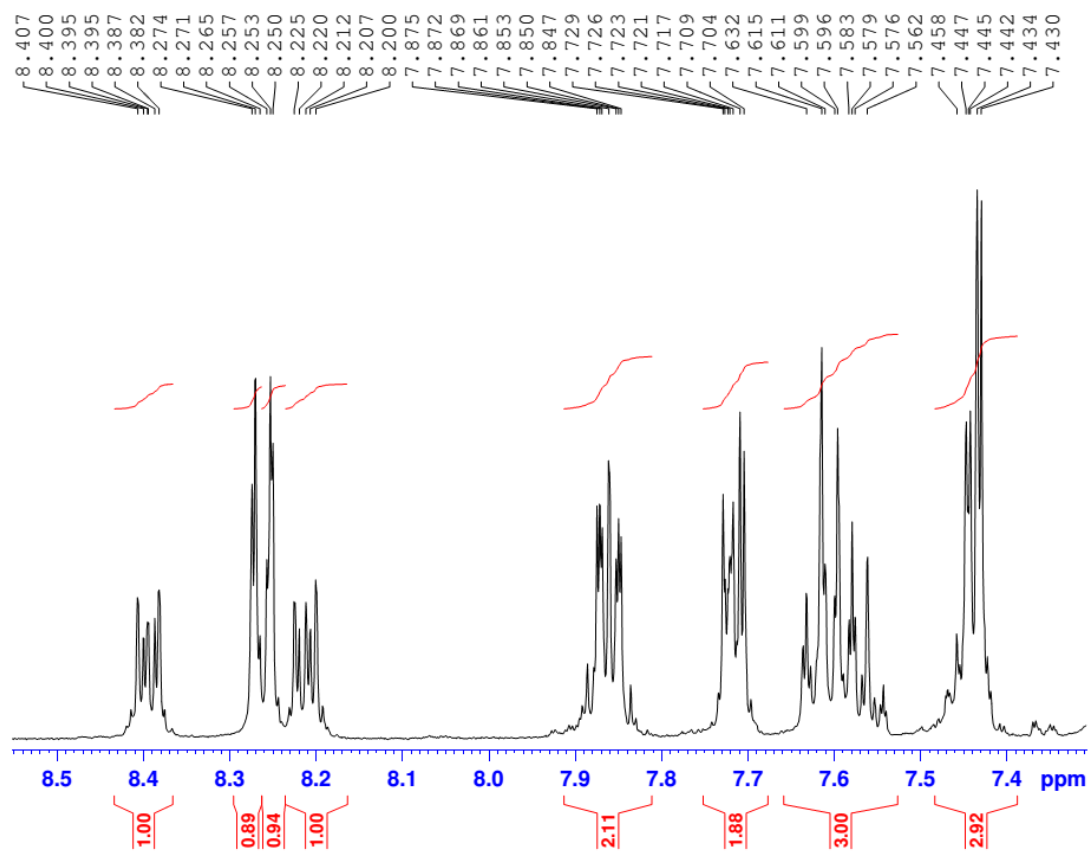

Figure 39:  $^1\text{H}$  NMR spectrum of **9a**

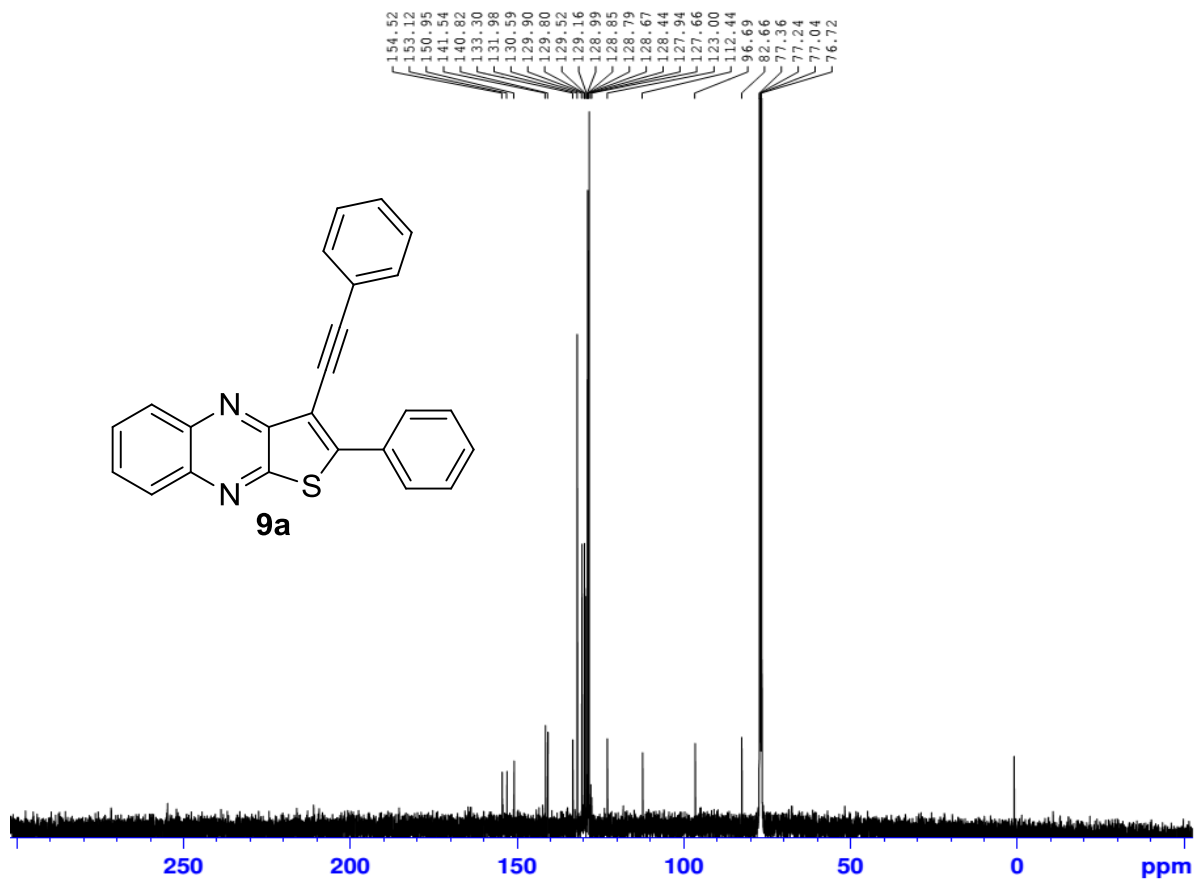

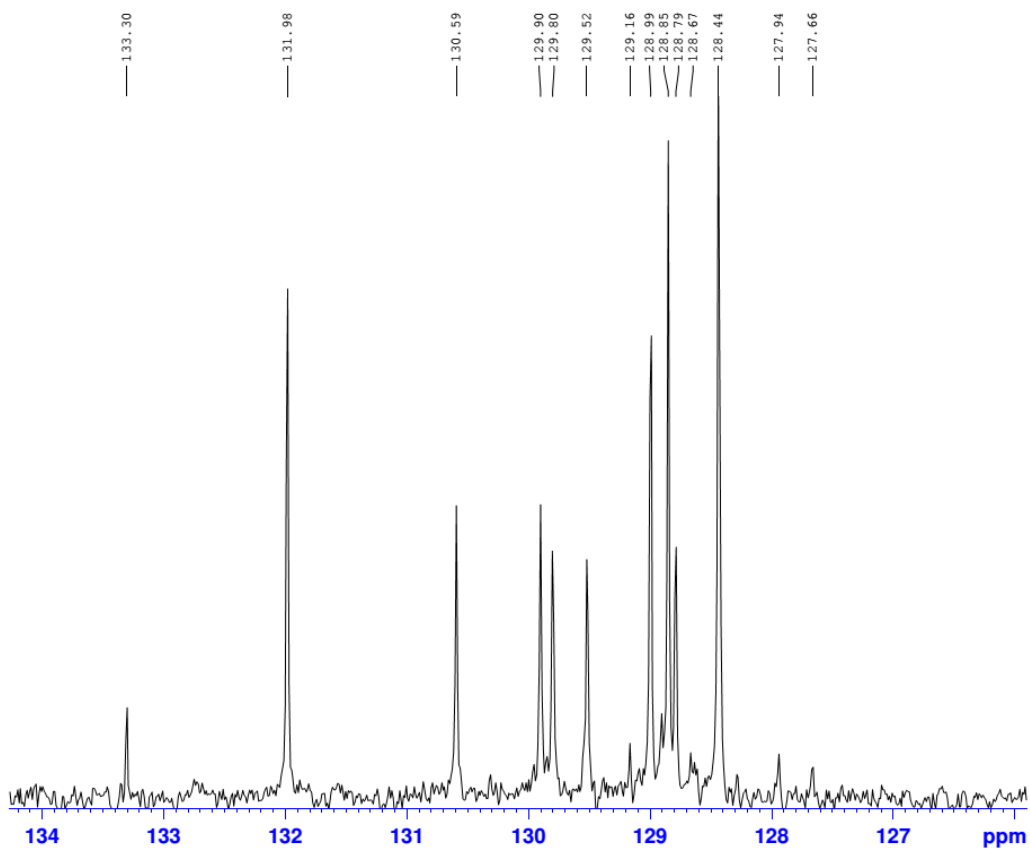

Figure 40:  $^{13}\text{C}$  NMR spectrum of **9a**

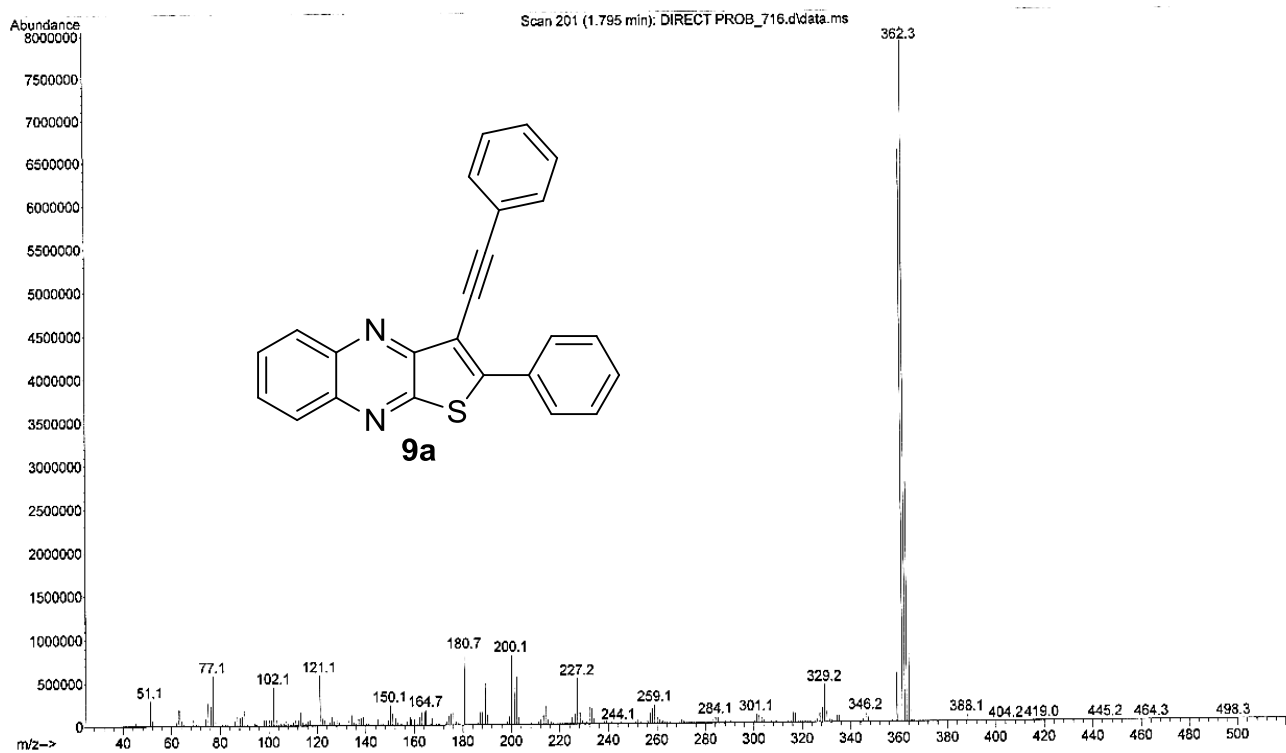

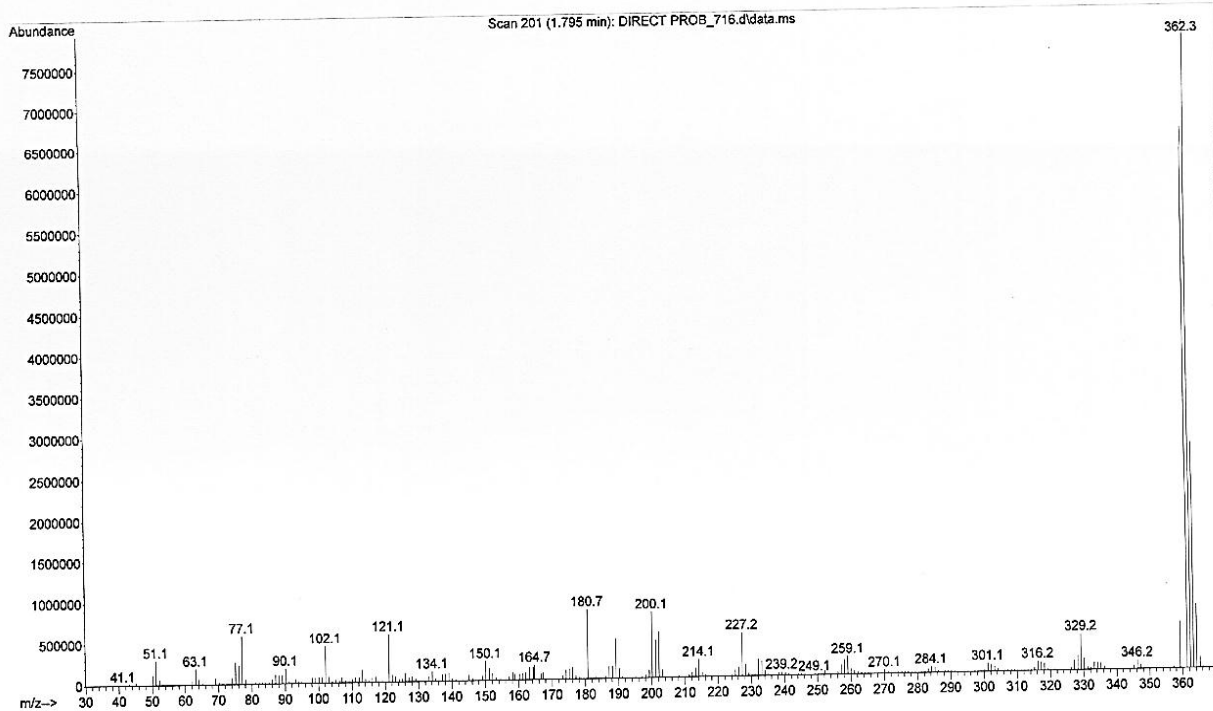

Figure 41: Mass spectrum of 9a

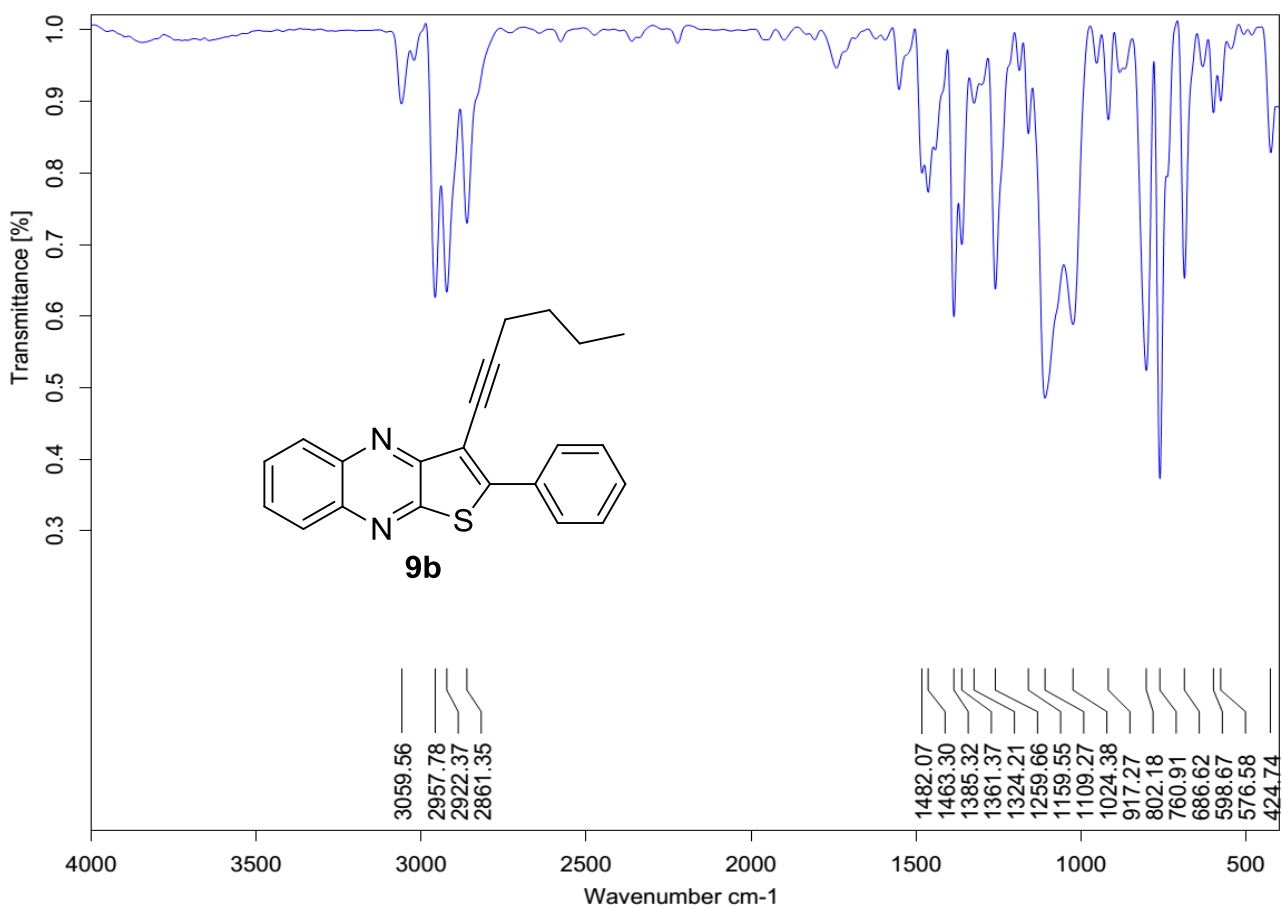

Figure 42: IR spectrum of 9b

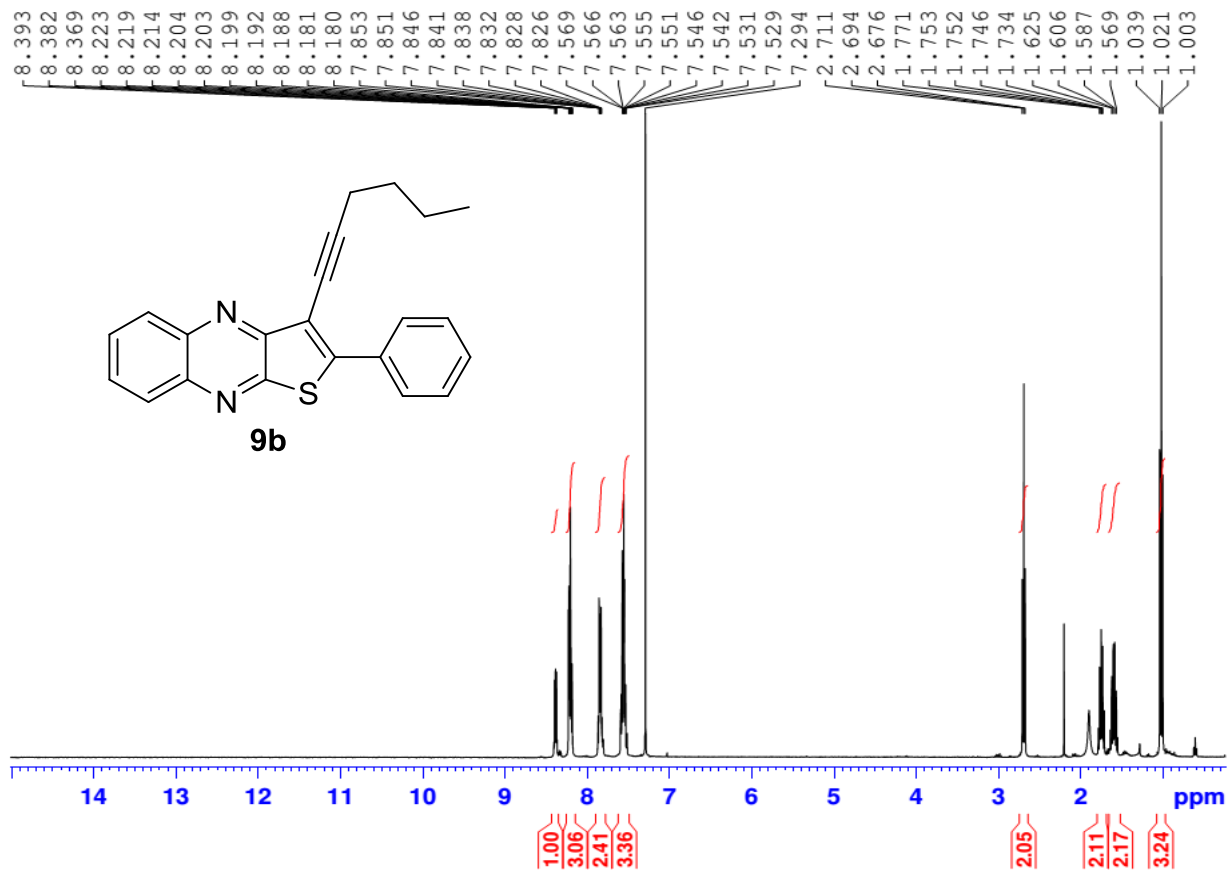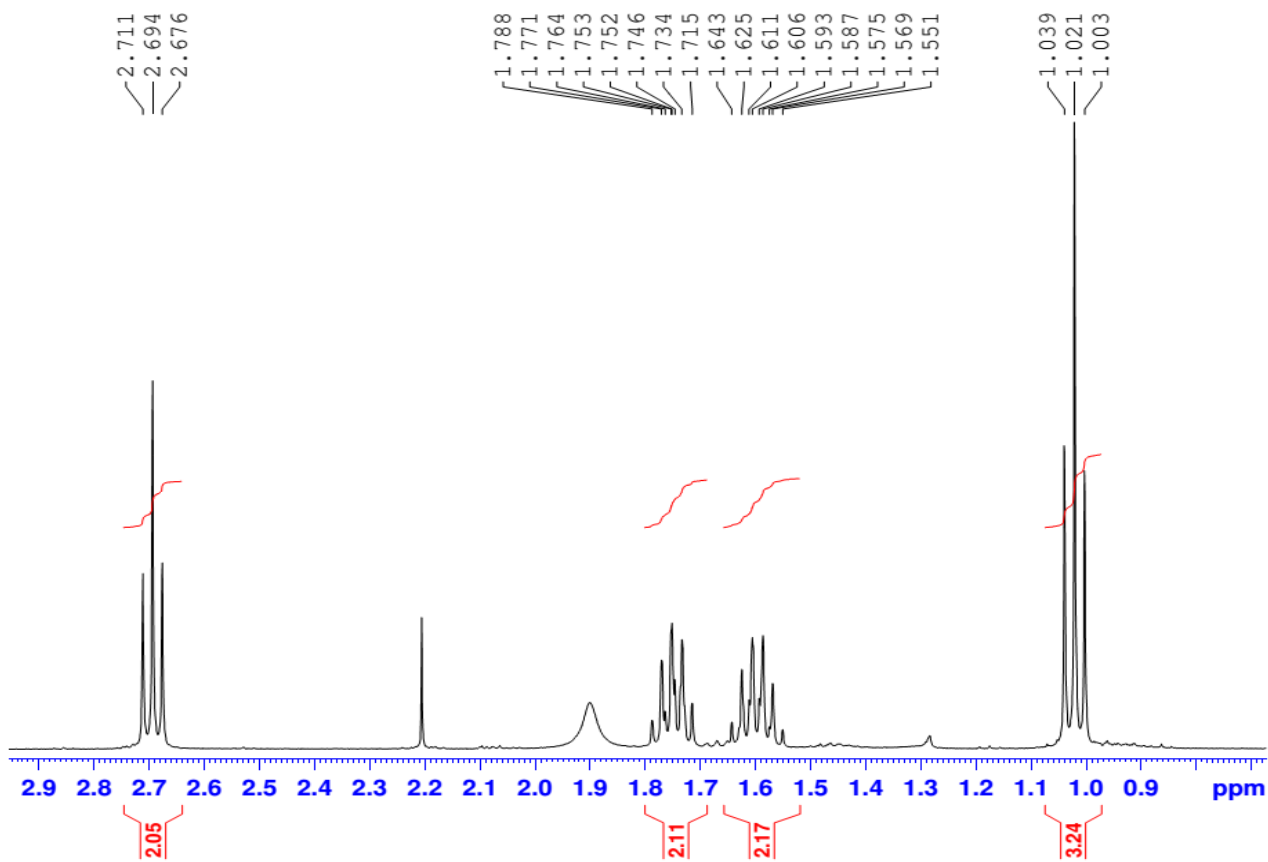

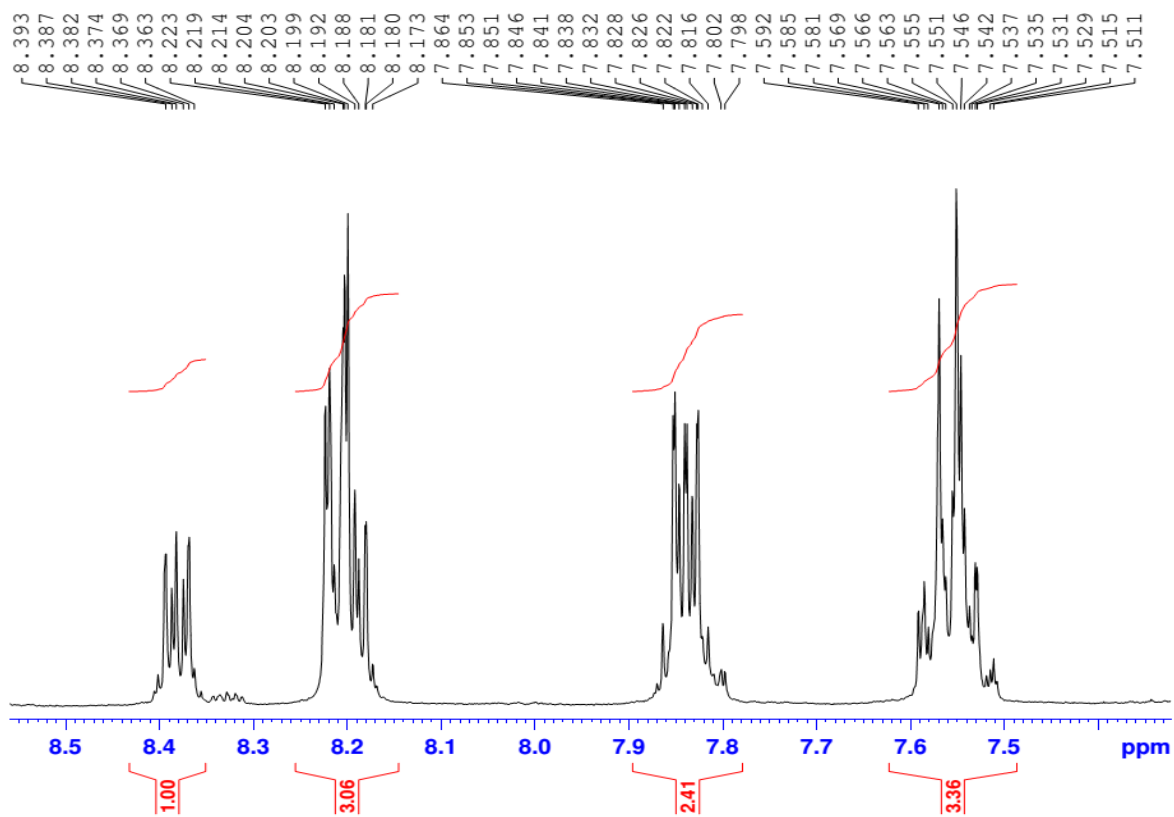

Figure 43:  $^1\text{H}$  NMR spectrum of **9b**

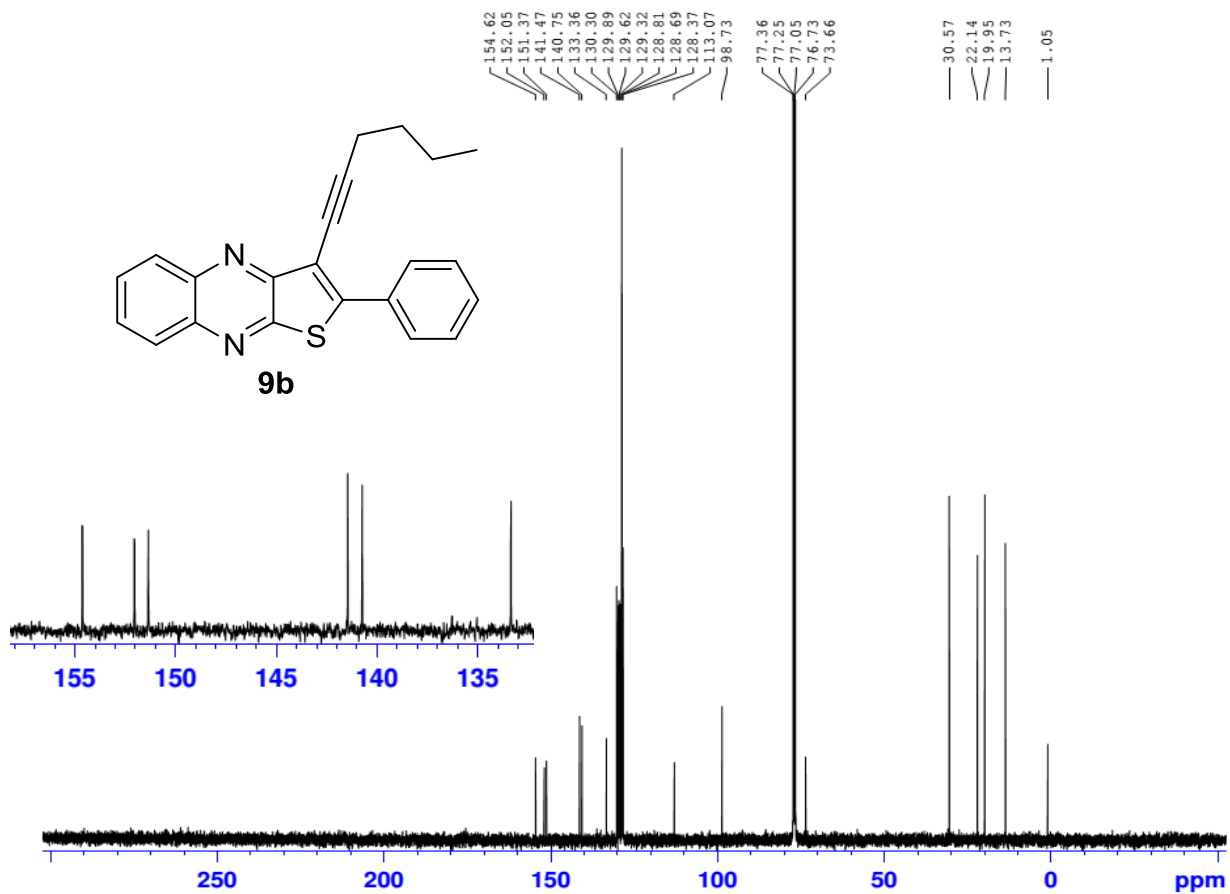



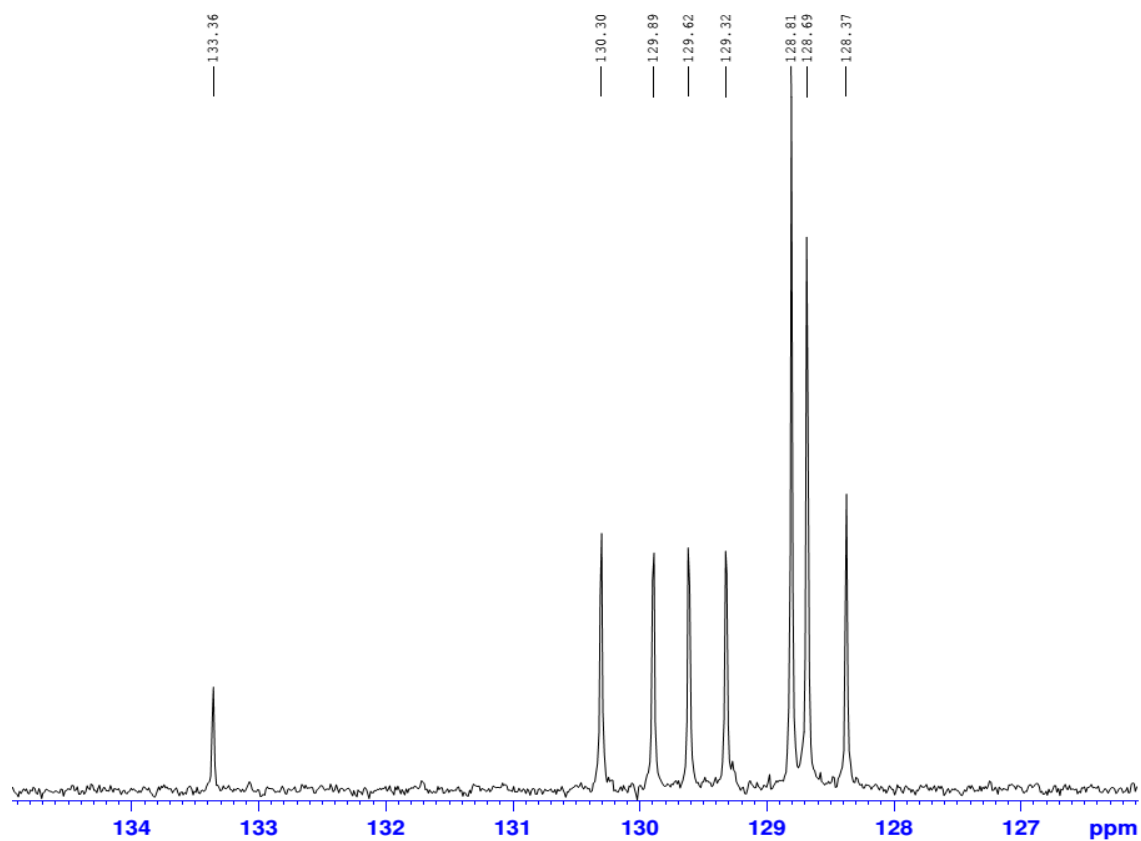

Figure 44:  $^{13}\text{C}$  NMR spectrum of **9b**

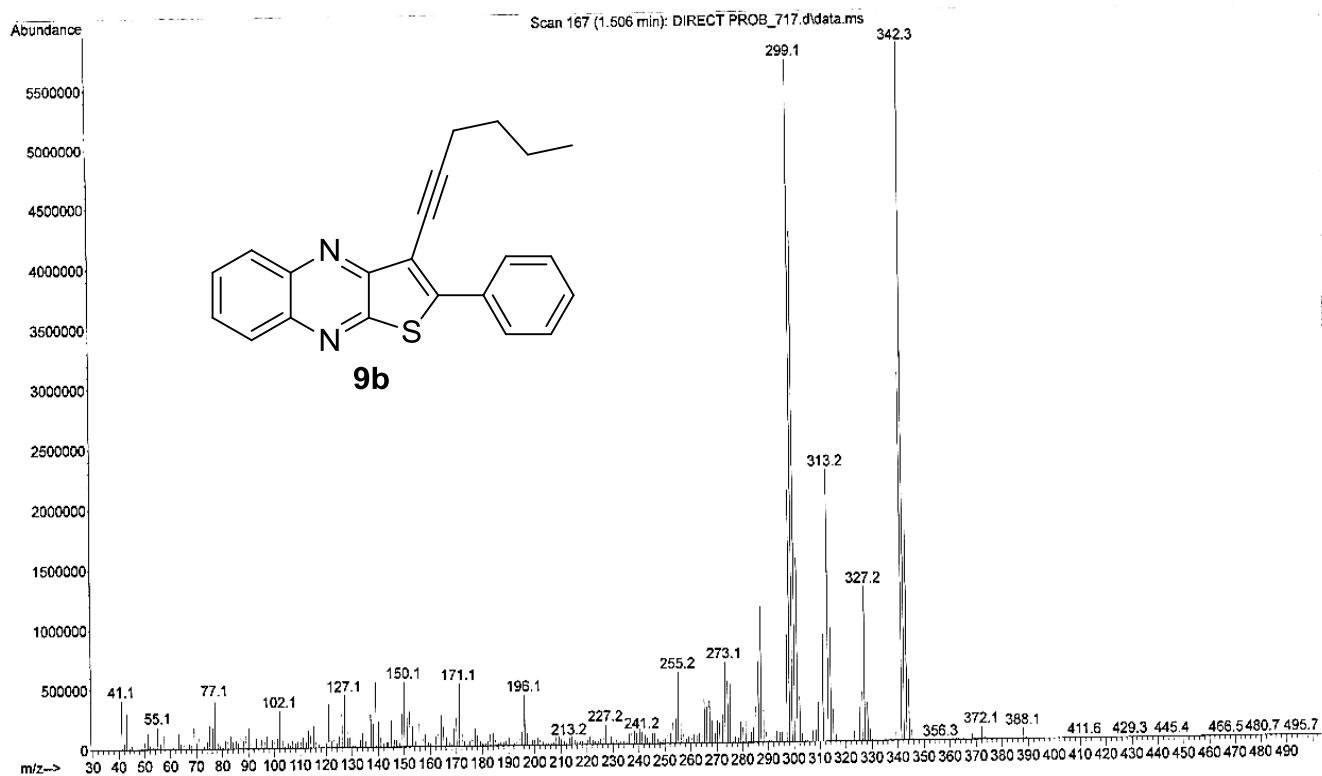

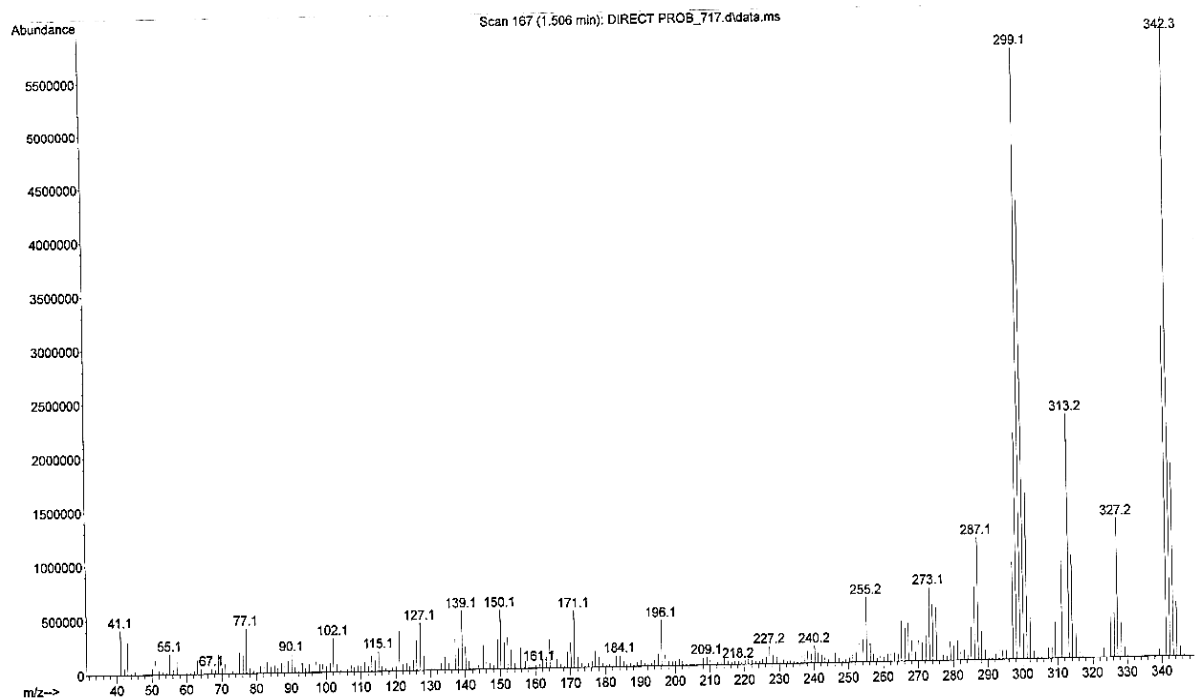

Figure 45: Mass spectrum of 9b

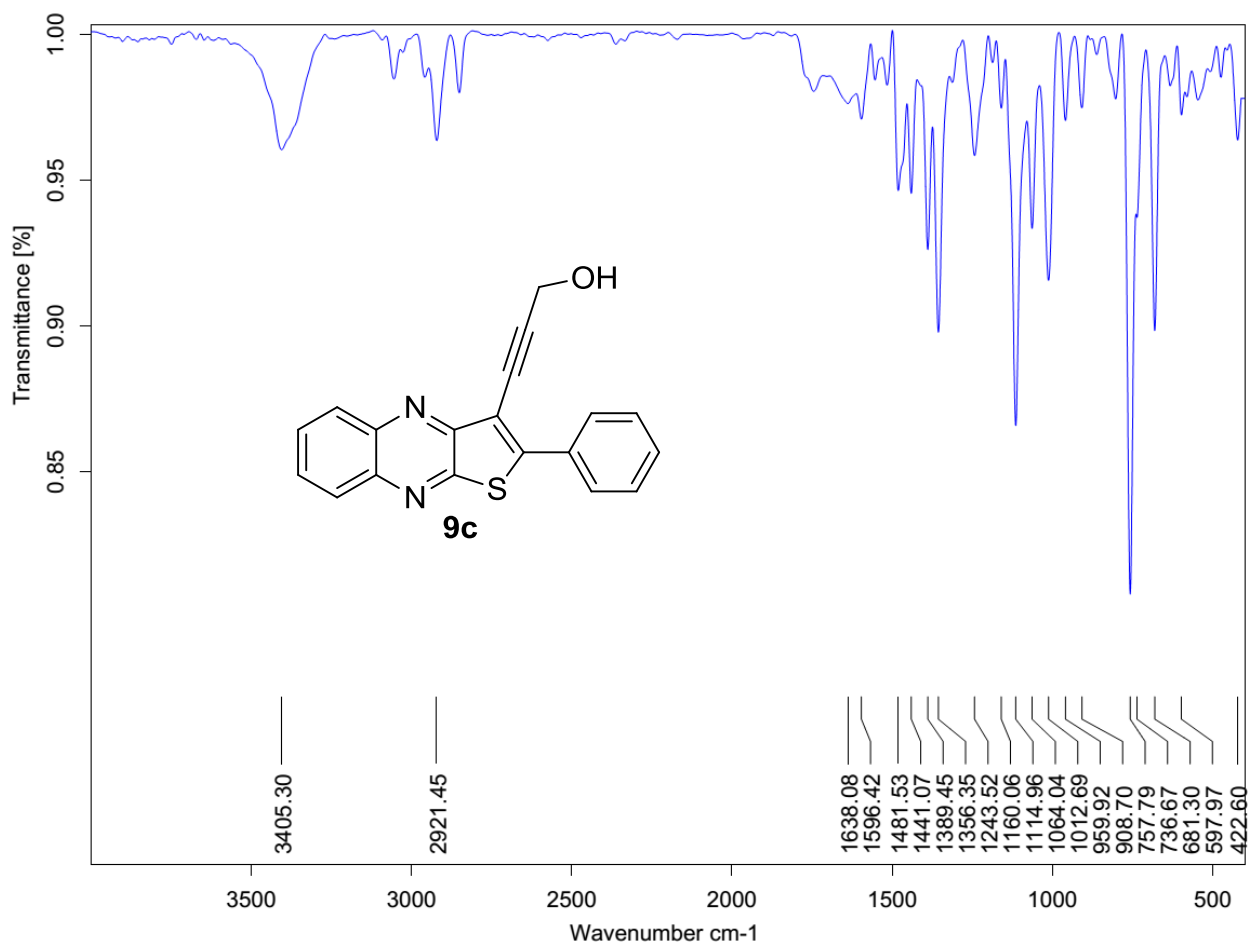

Figure 46: IR spectrum of 9c

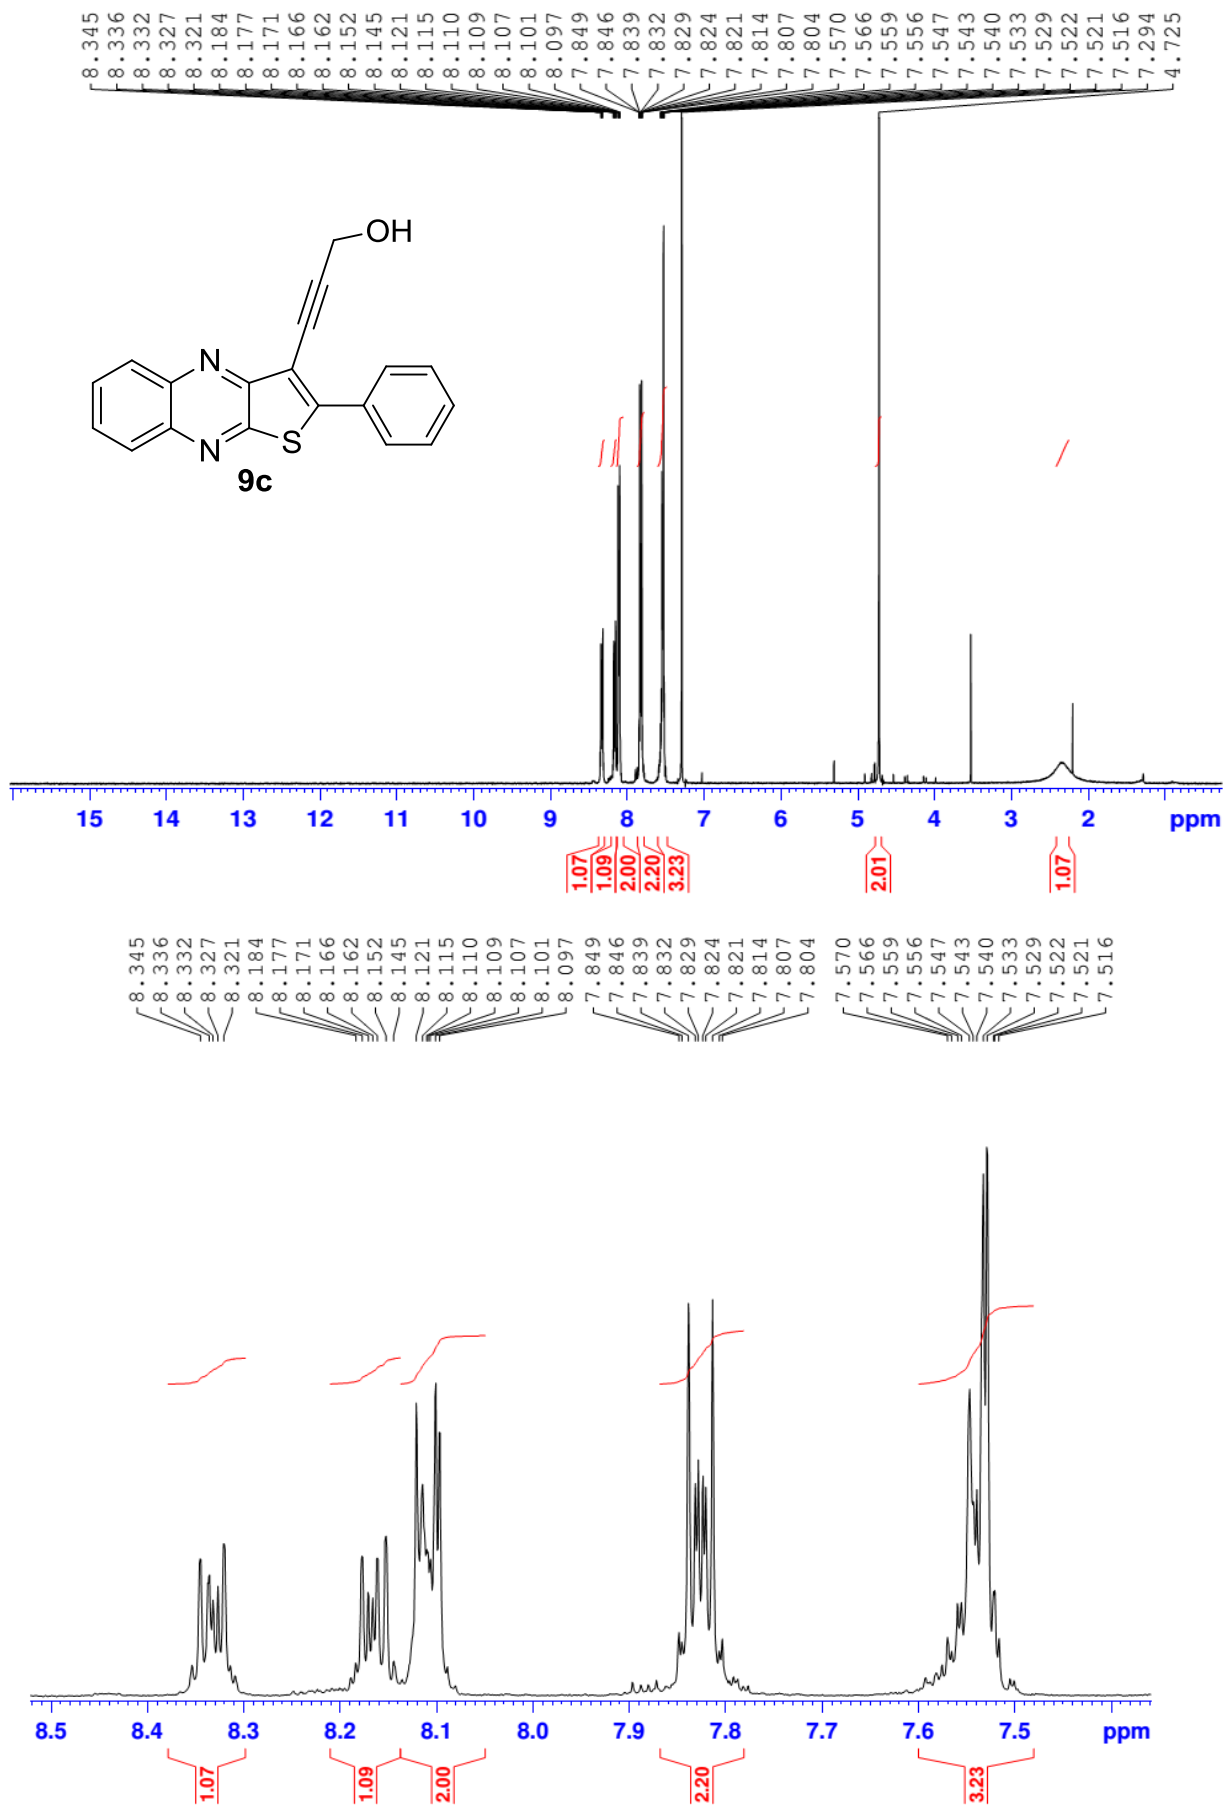

Figure 47: <sup>1</sup>H NMR spectrum of 9c

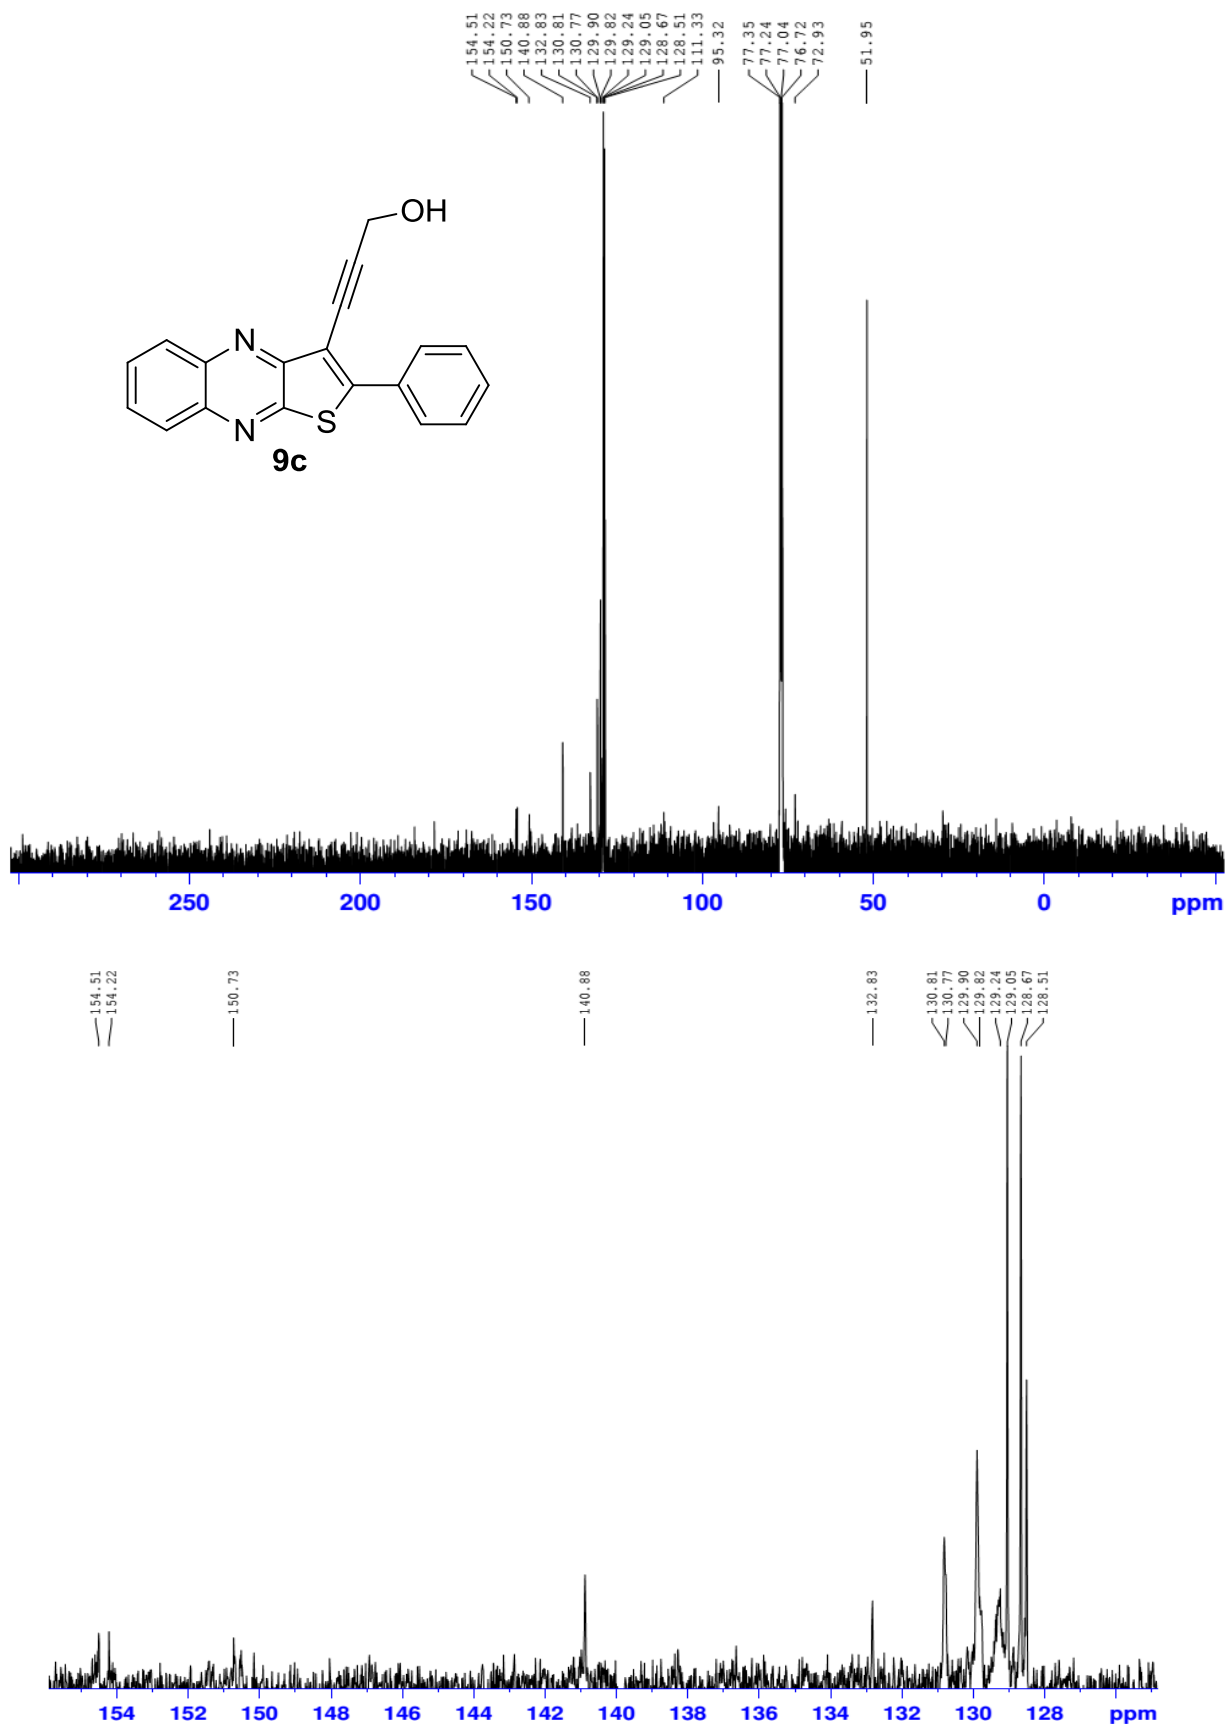

**Figure 48:**  $^{13}\text{C}$  NMR spectrum of **9c**

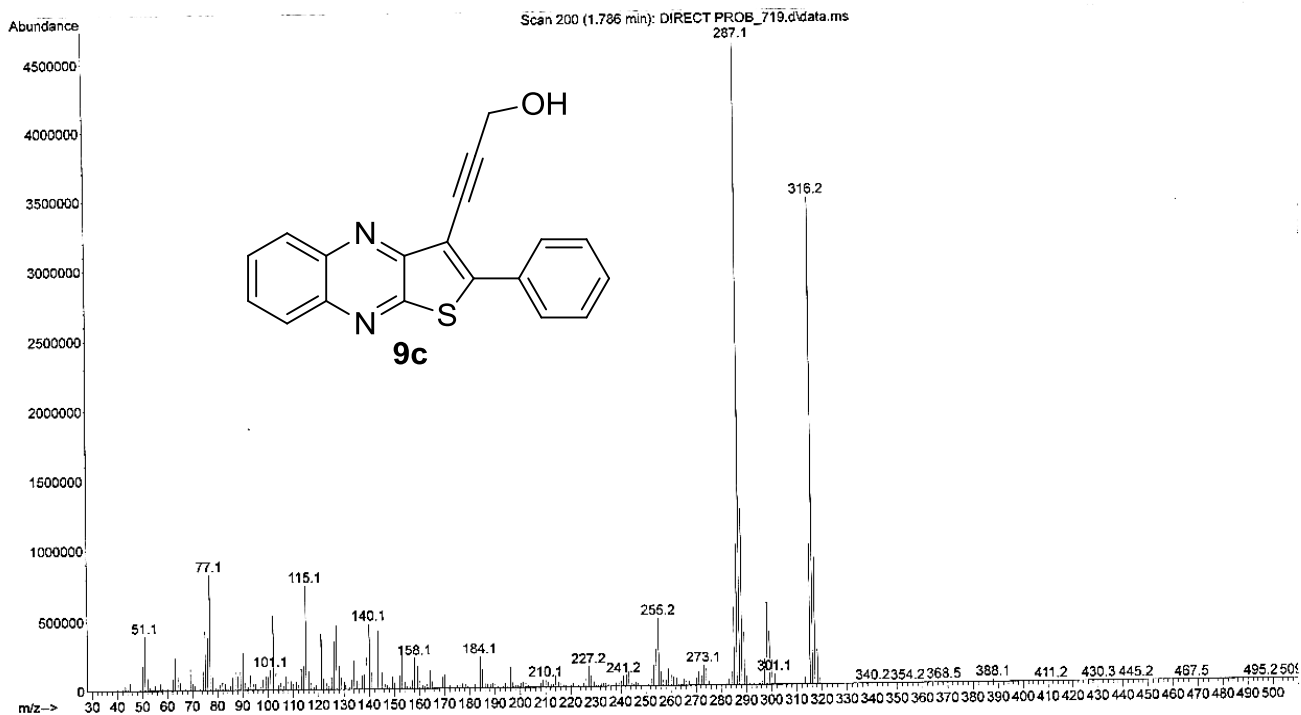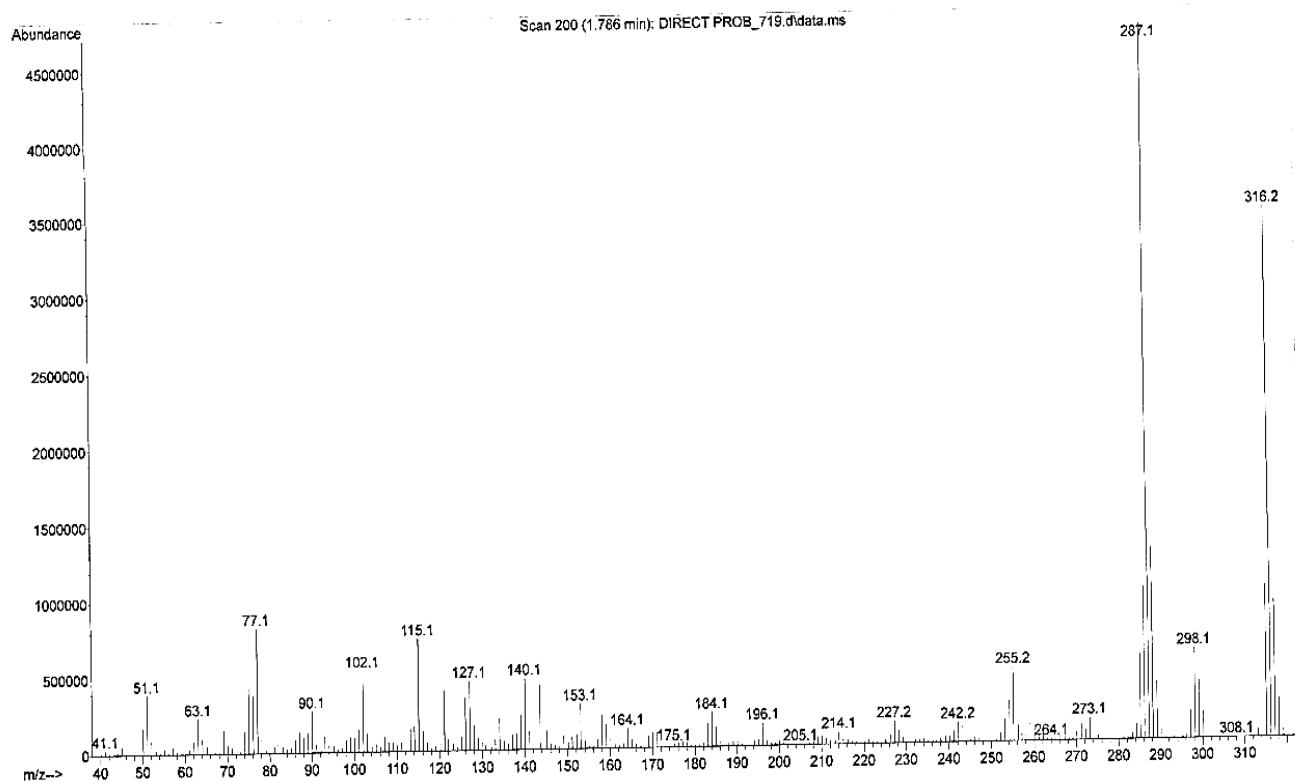

Figure 49: Mass spectrum of 9c

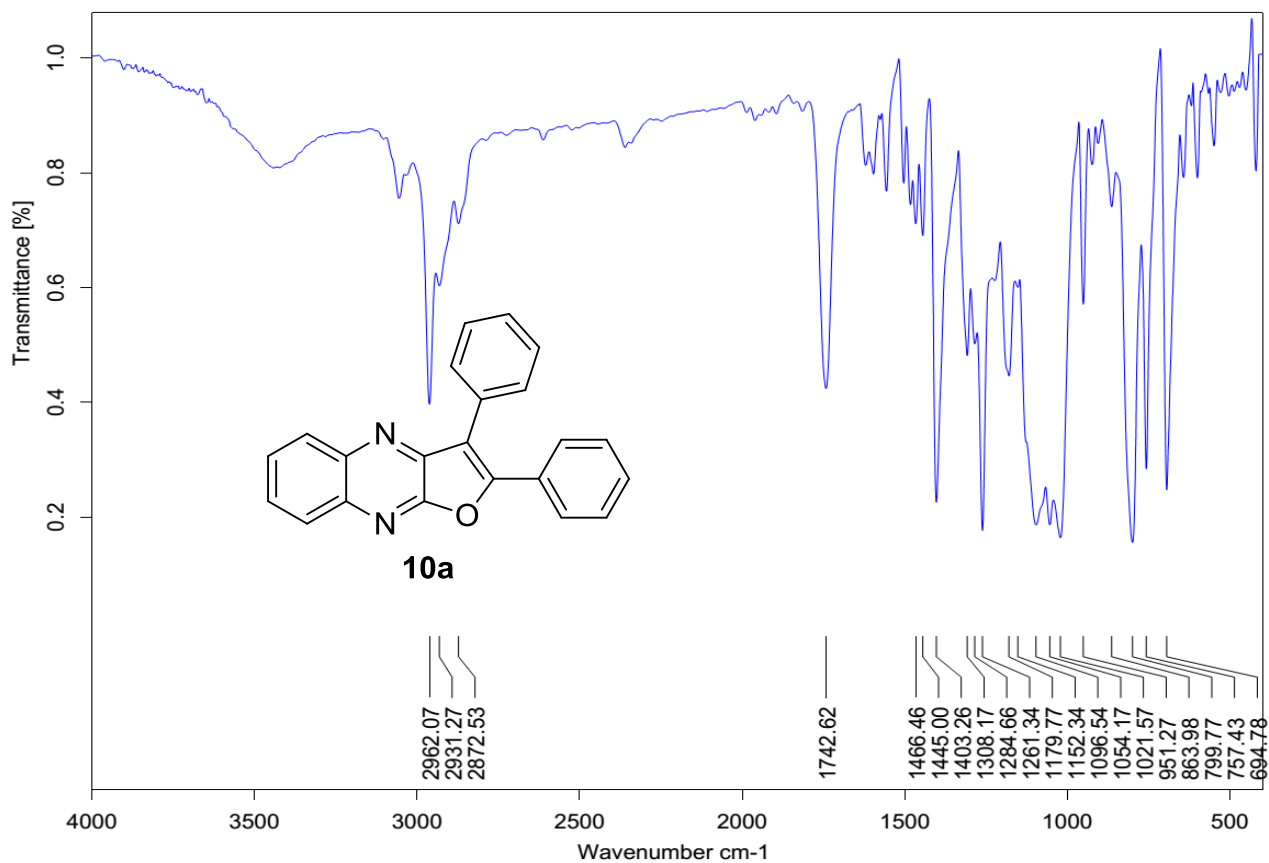

Figure 50: IR spectrum of 10a

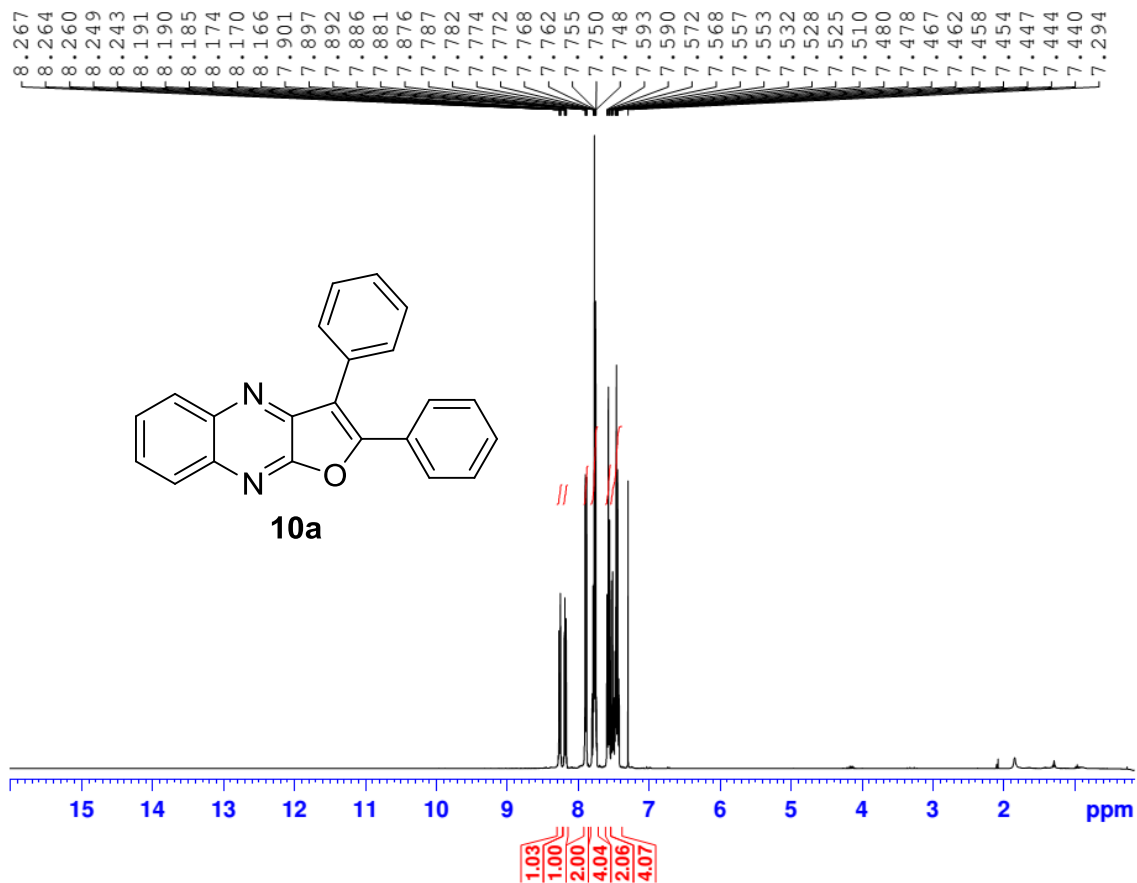

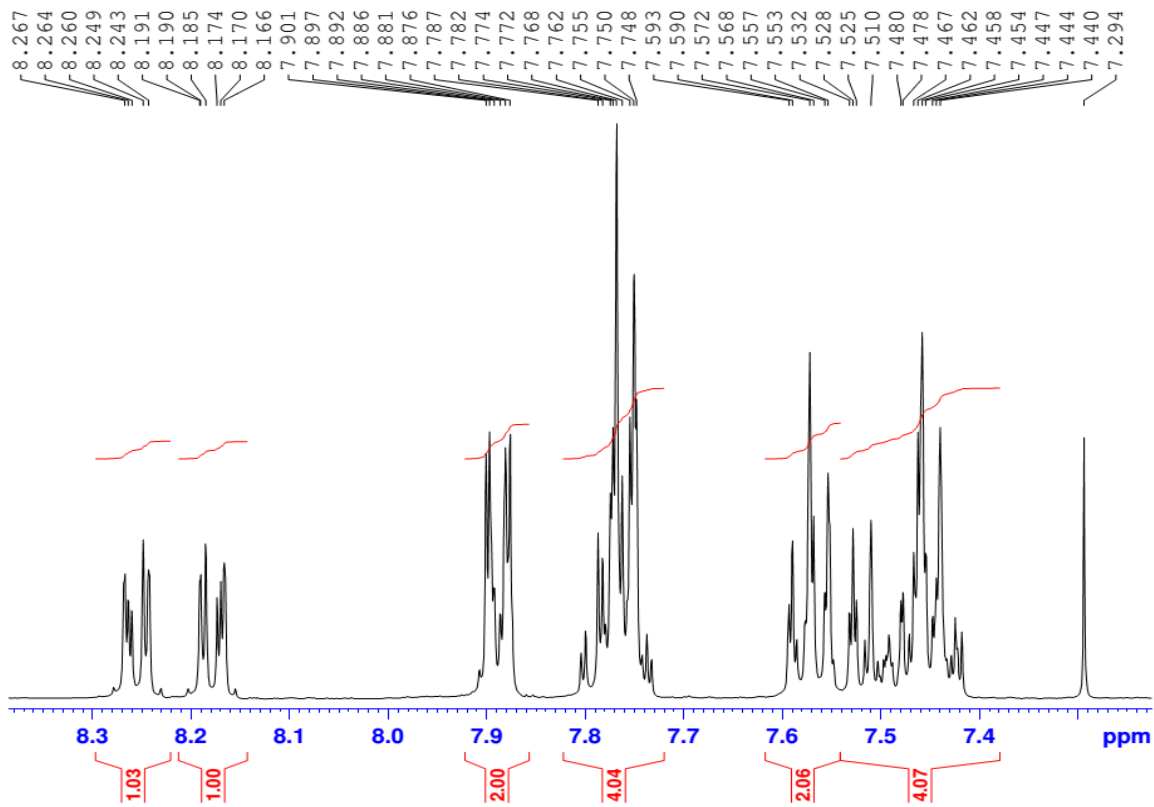

Figure 51:  $^1\text{H}$  NMR spectrum of **10a**

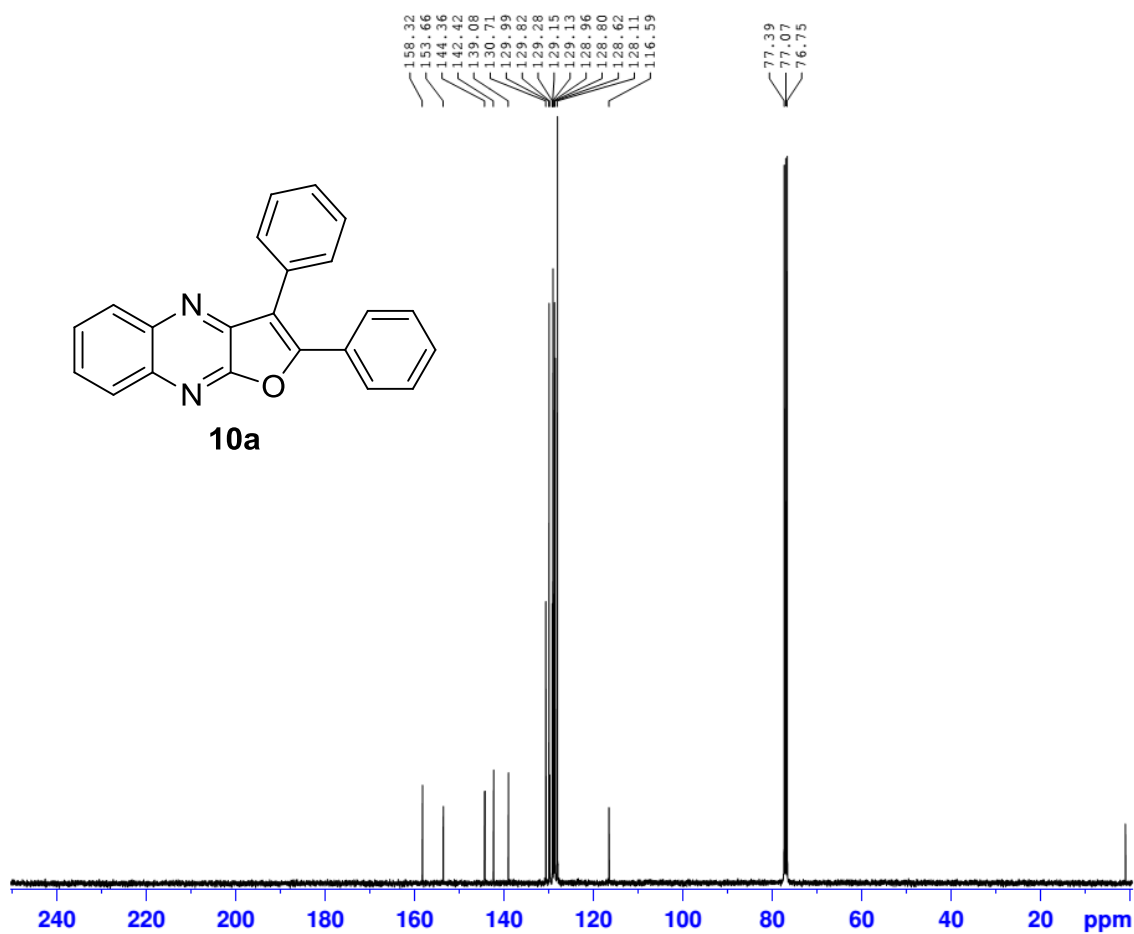

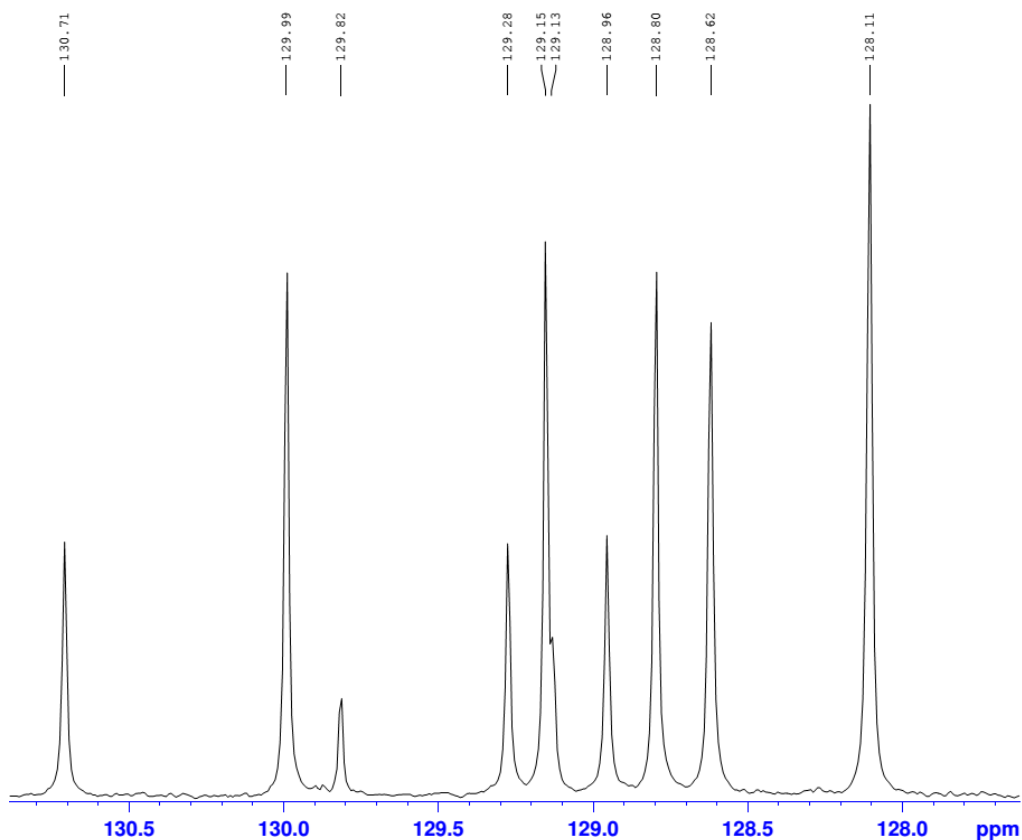

Figure 52:  $^{13}\text{C}$  NMR spectrum of **10a**

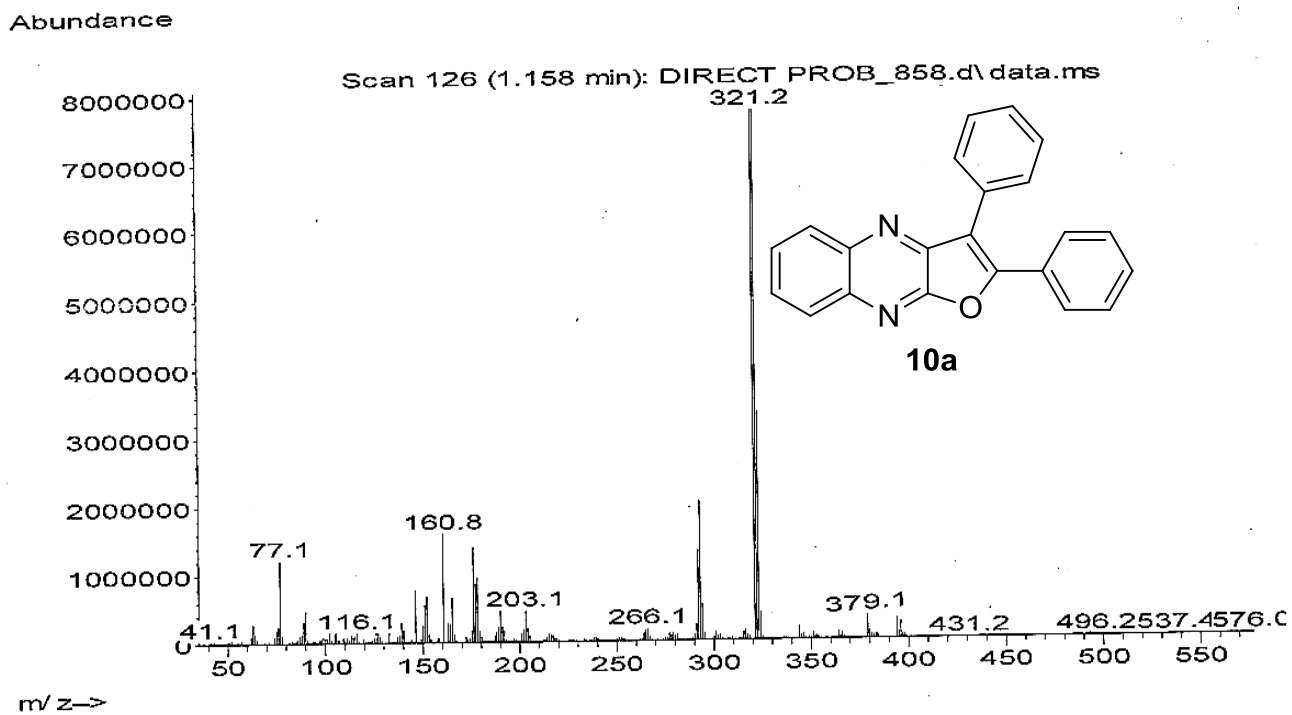



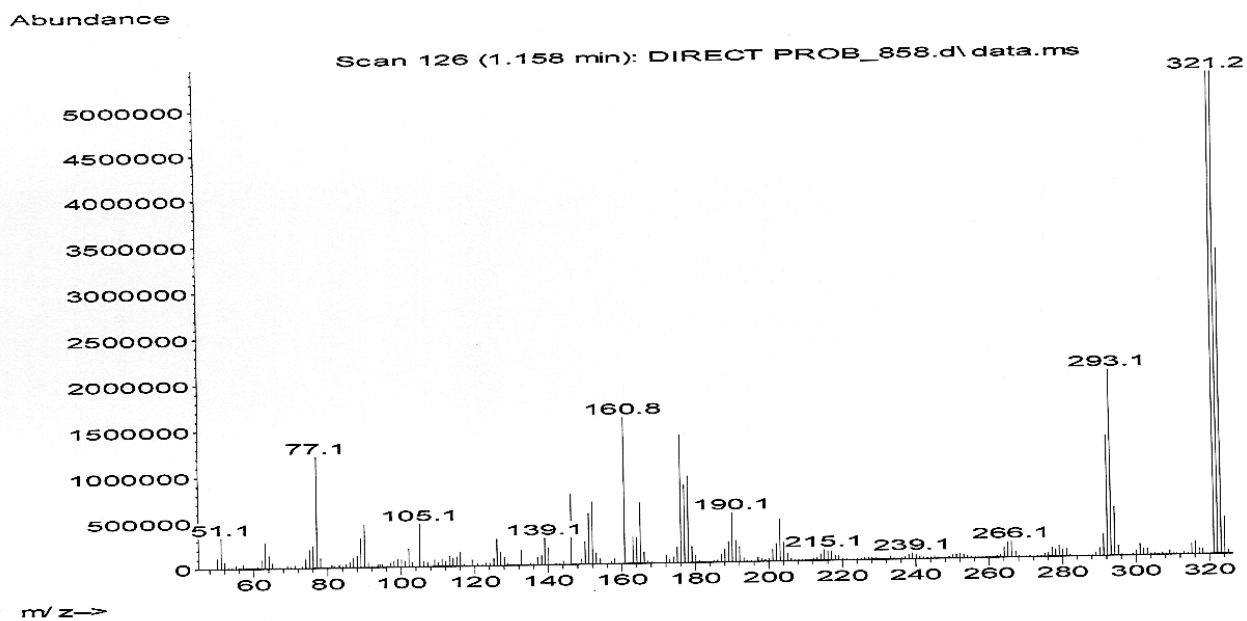

Figure 53: Mass spectrum of 10a

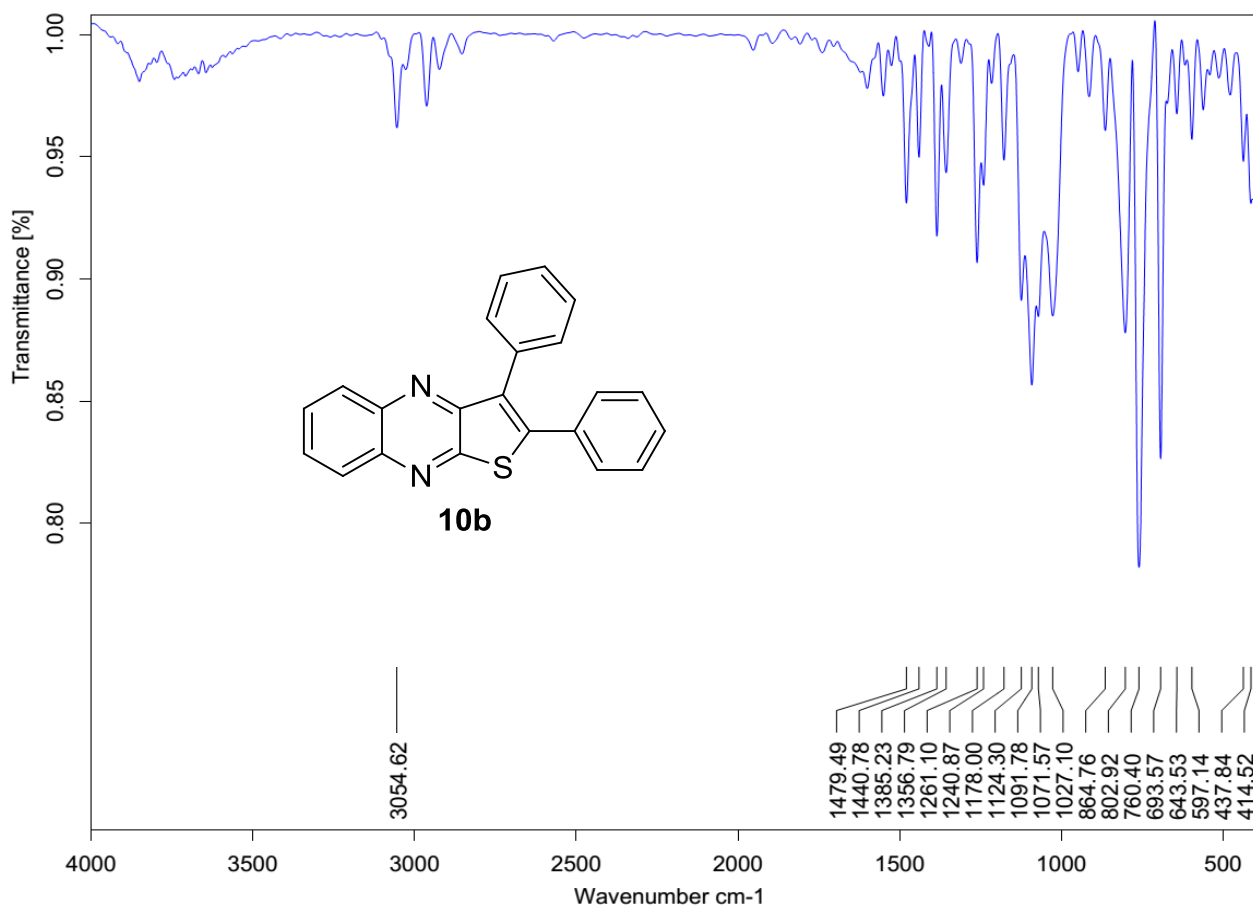

Figure 54: IR spectrum of 10b

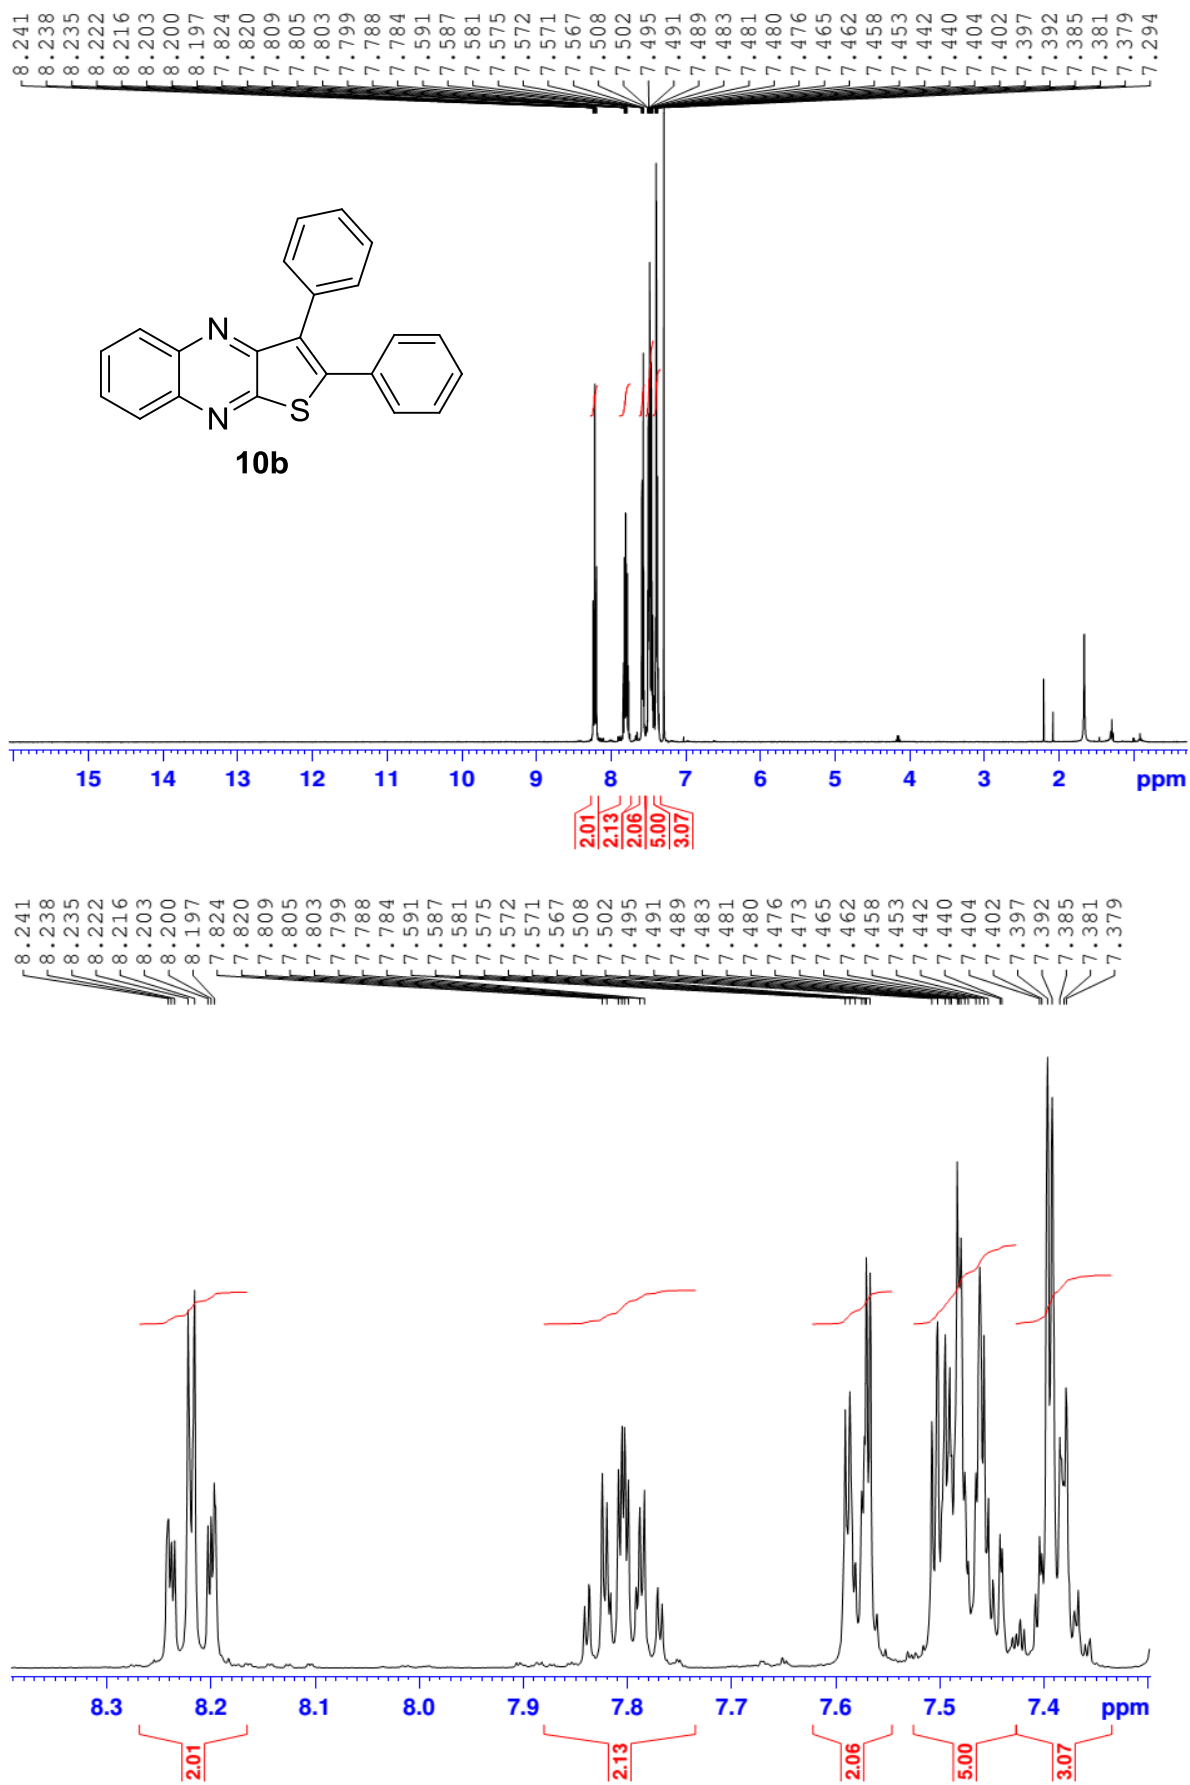

Figure 55: <sup>1</sup>H NMR spectrum of 10b

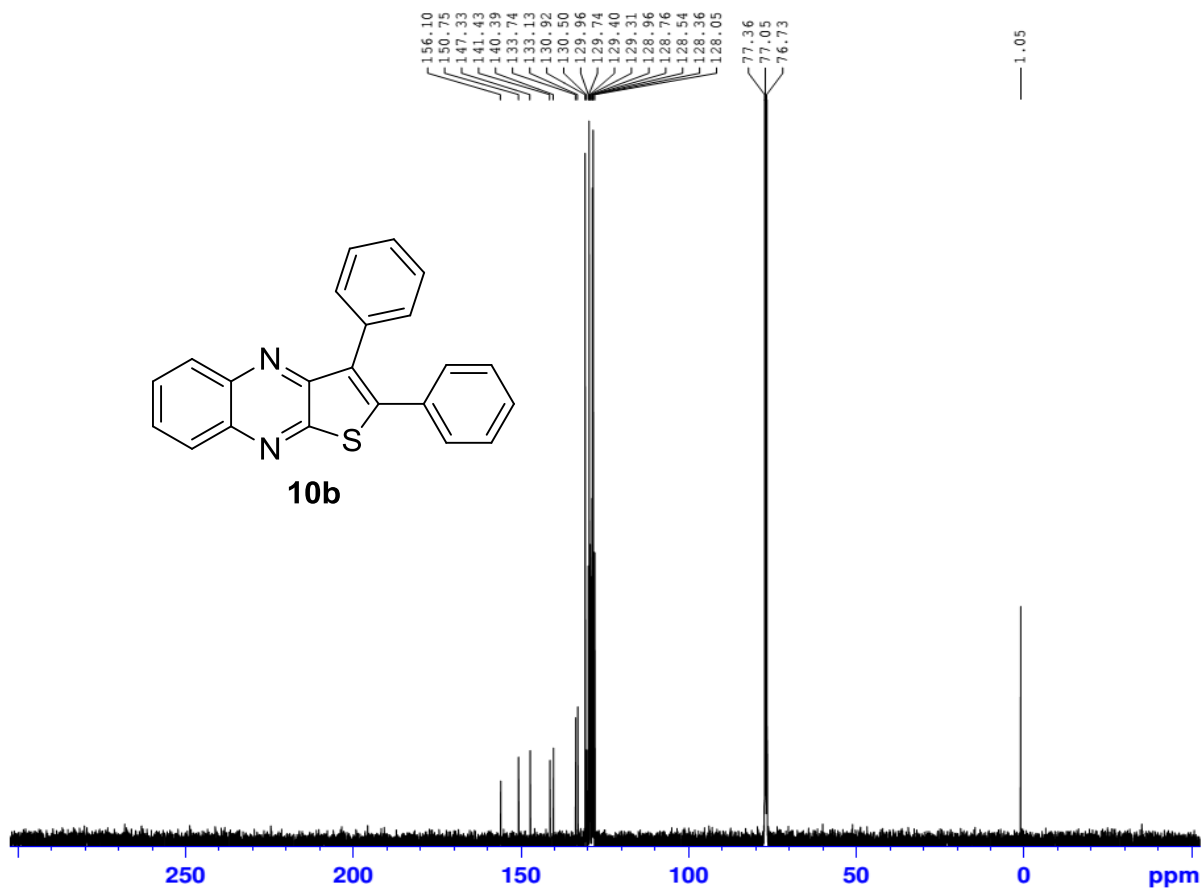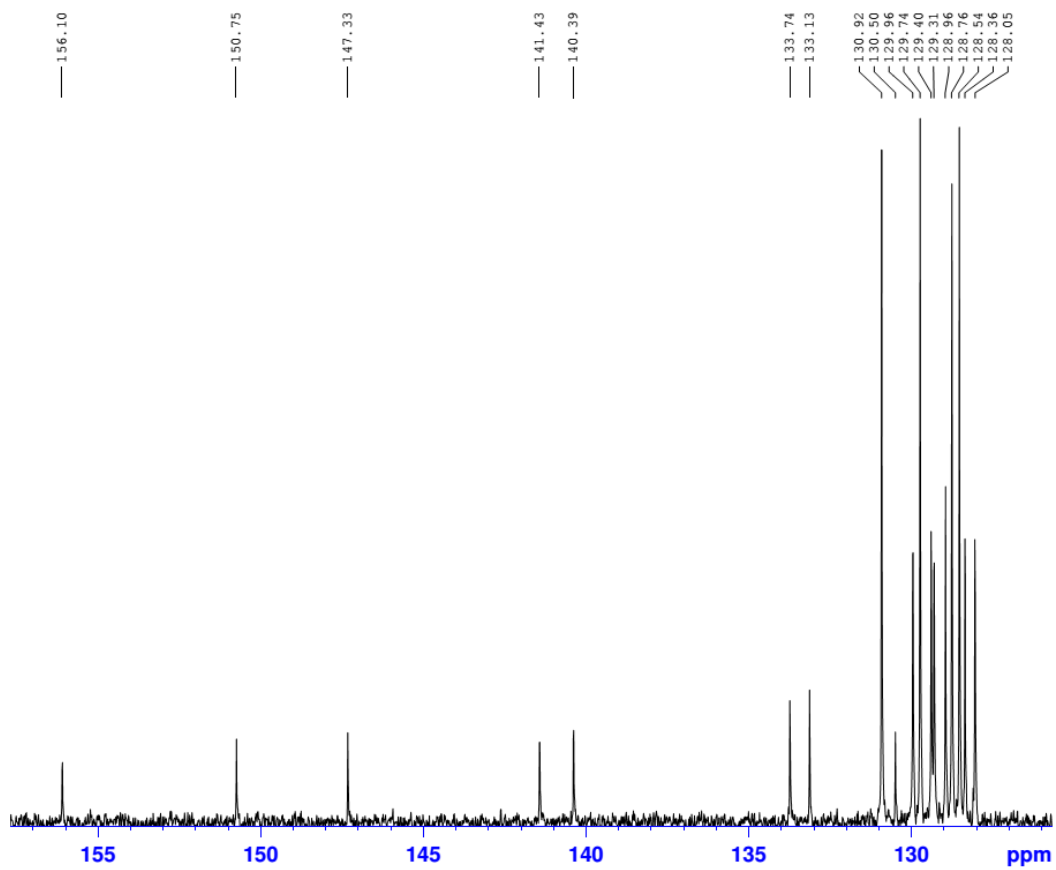

Figure 56:  $^{13}\text{C}$  NMR spectrum of **10b**

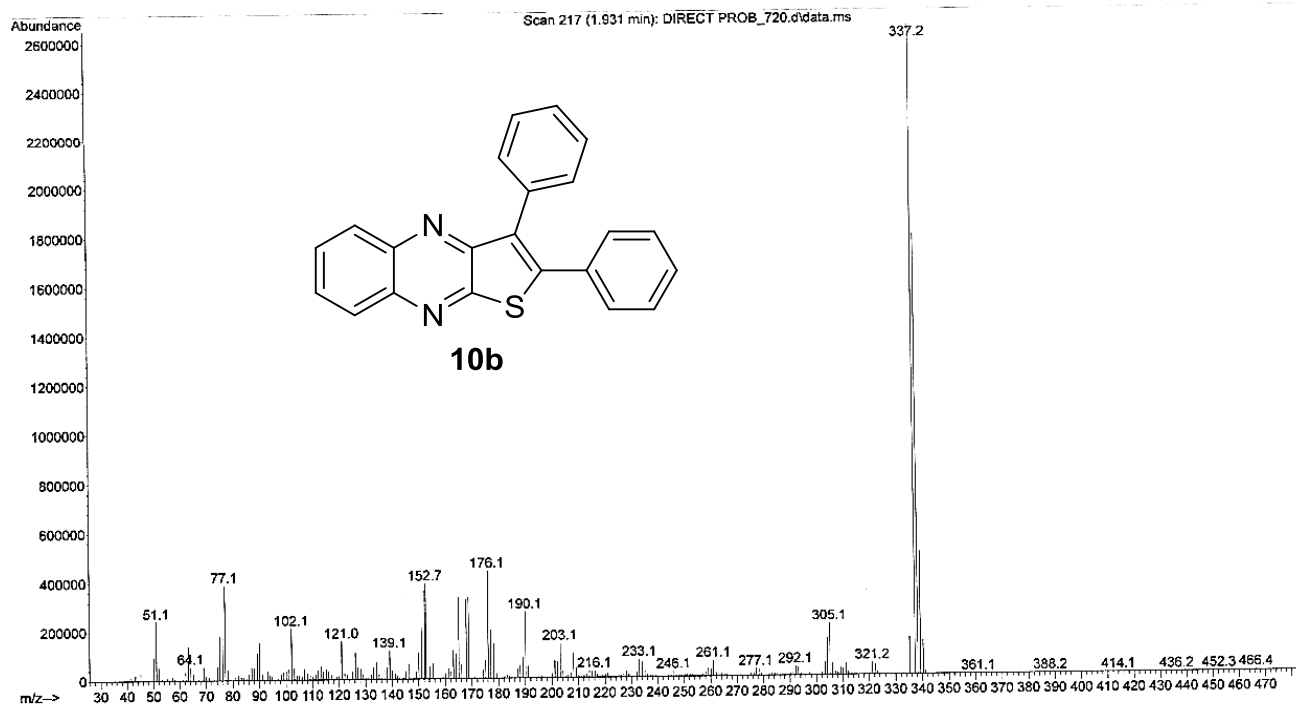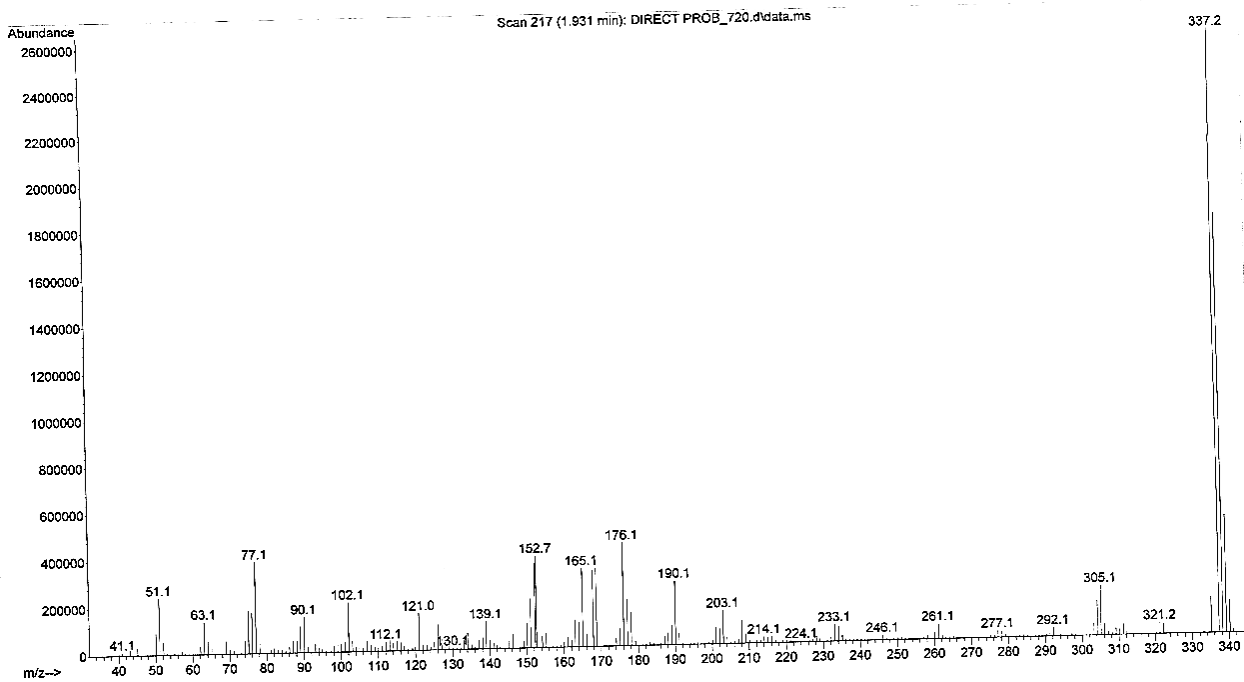

**Figure 57: Mass spectrum of 10b**

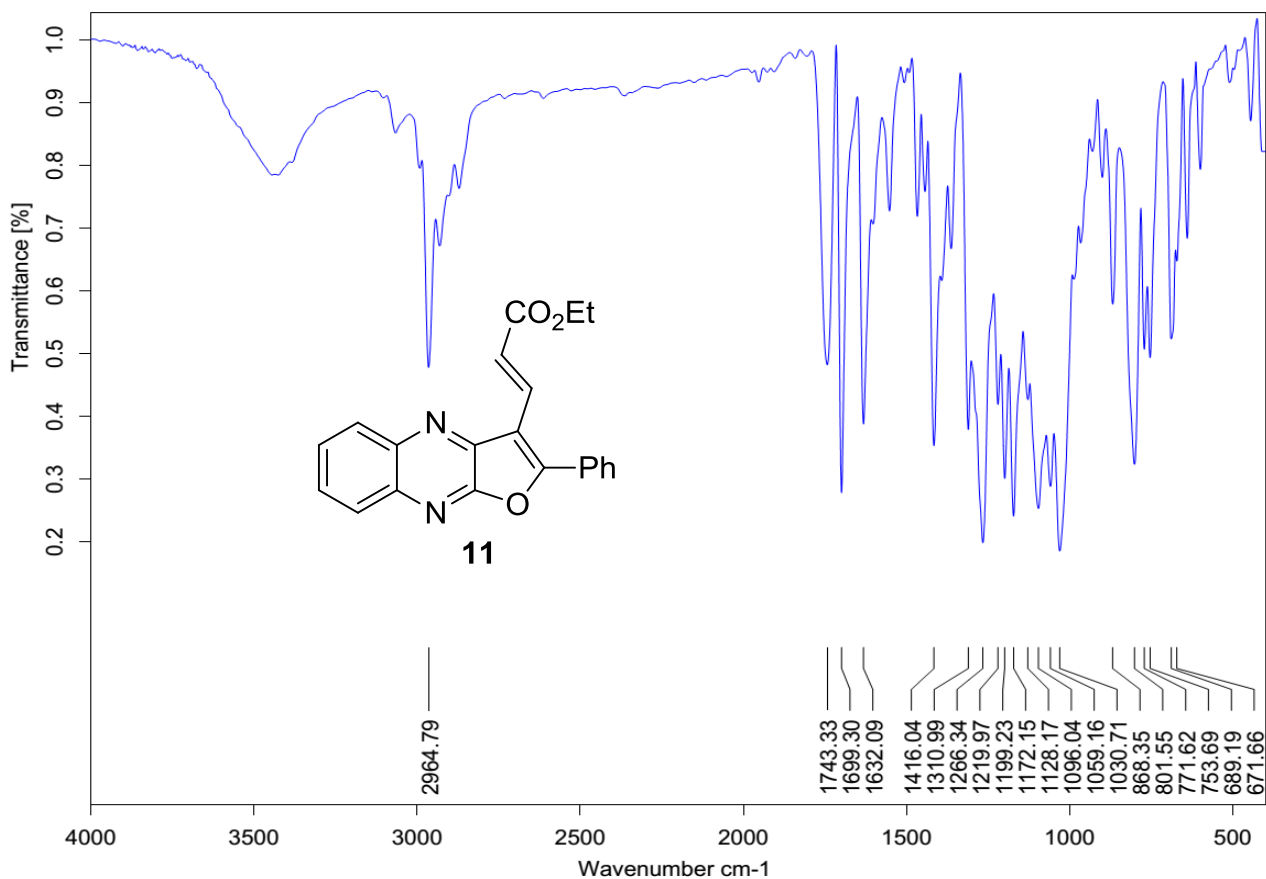

Figure 58: IR spectrum of 11

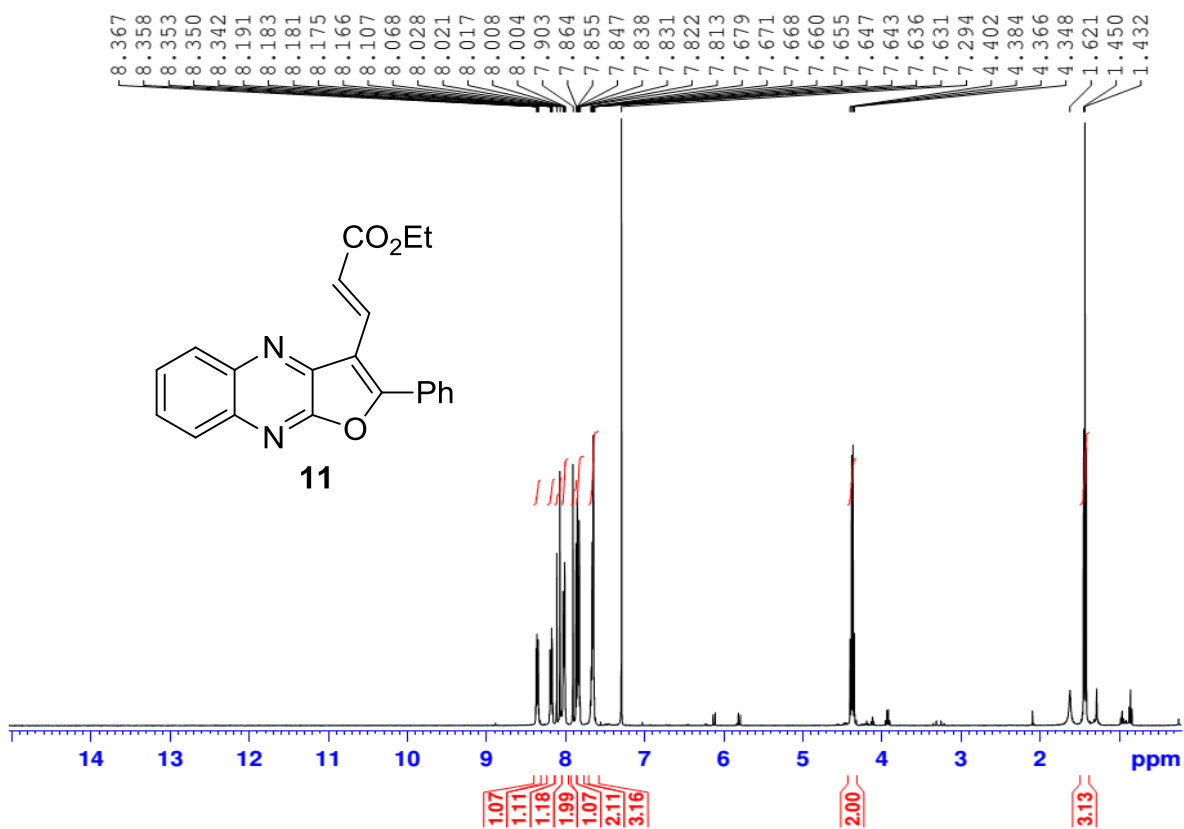

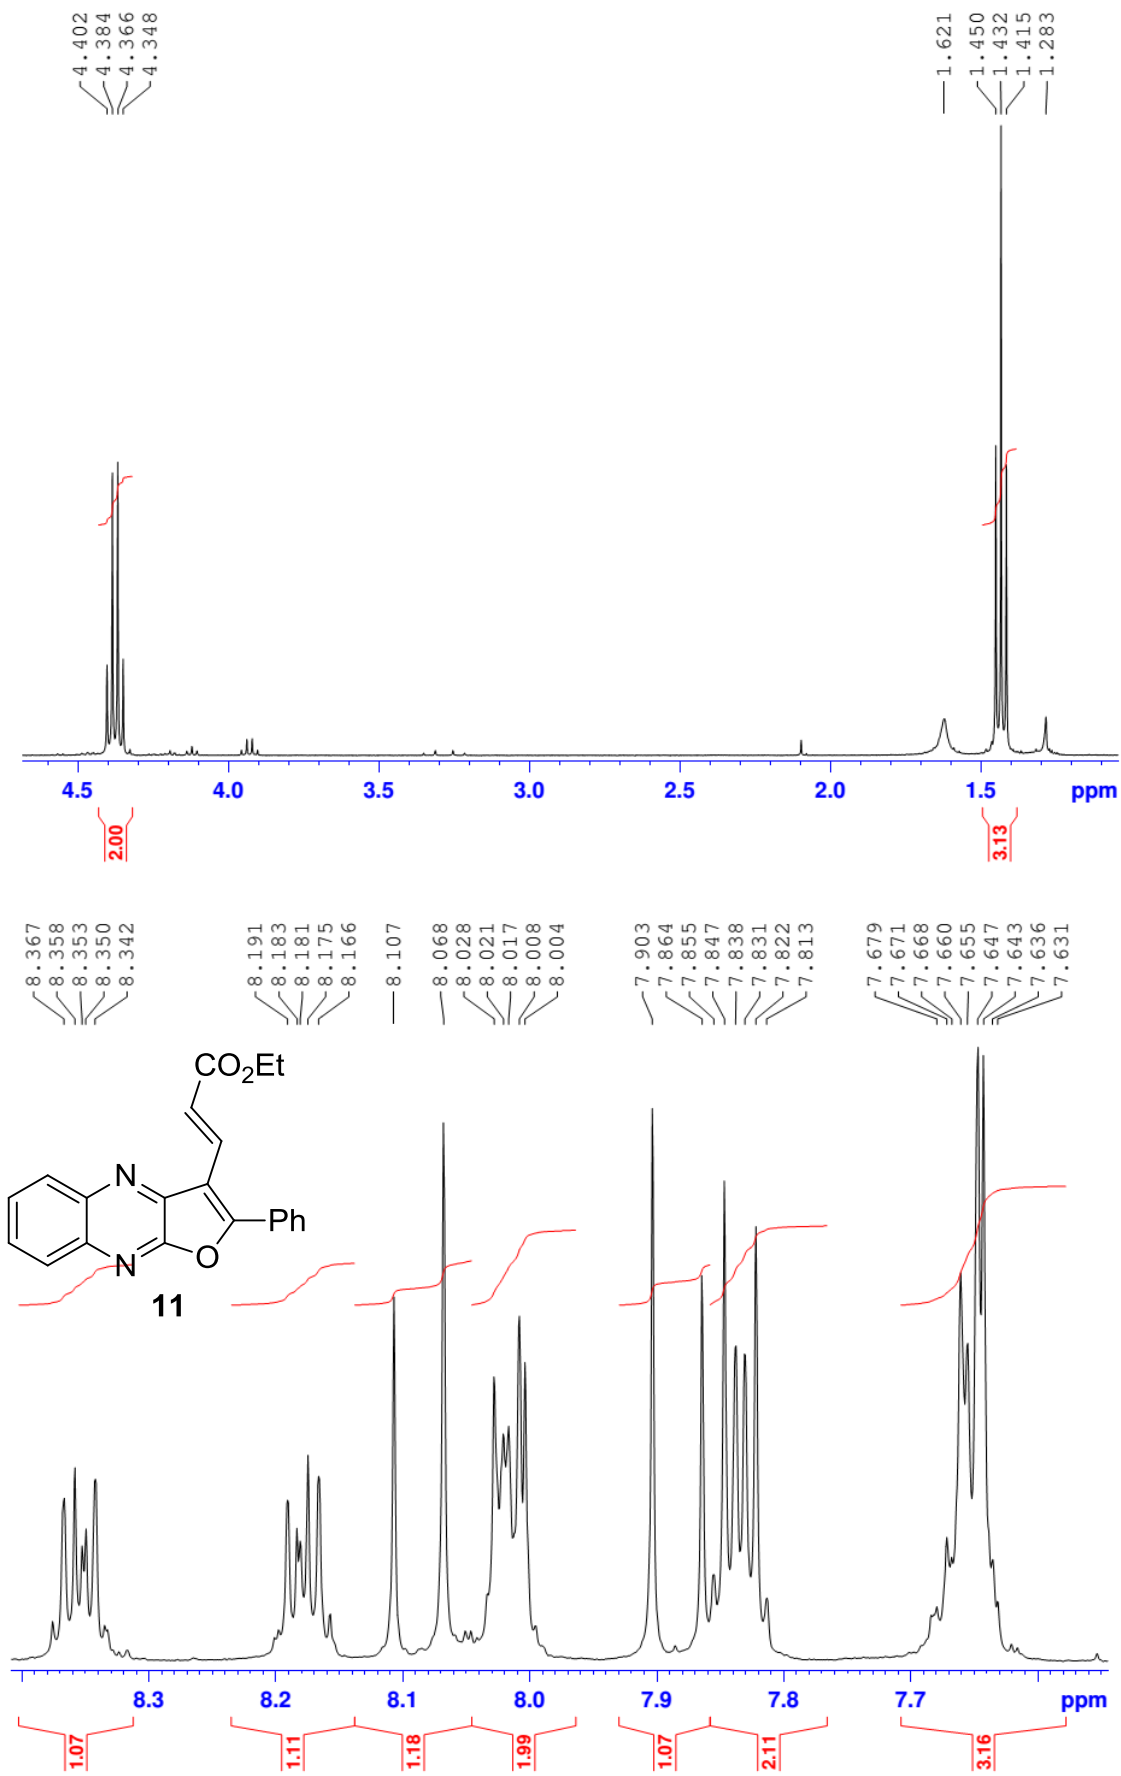

Figure 59: <sup>1</sup>H NMR spectrum of **11**

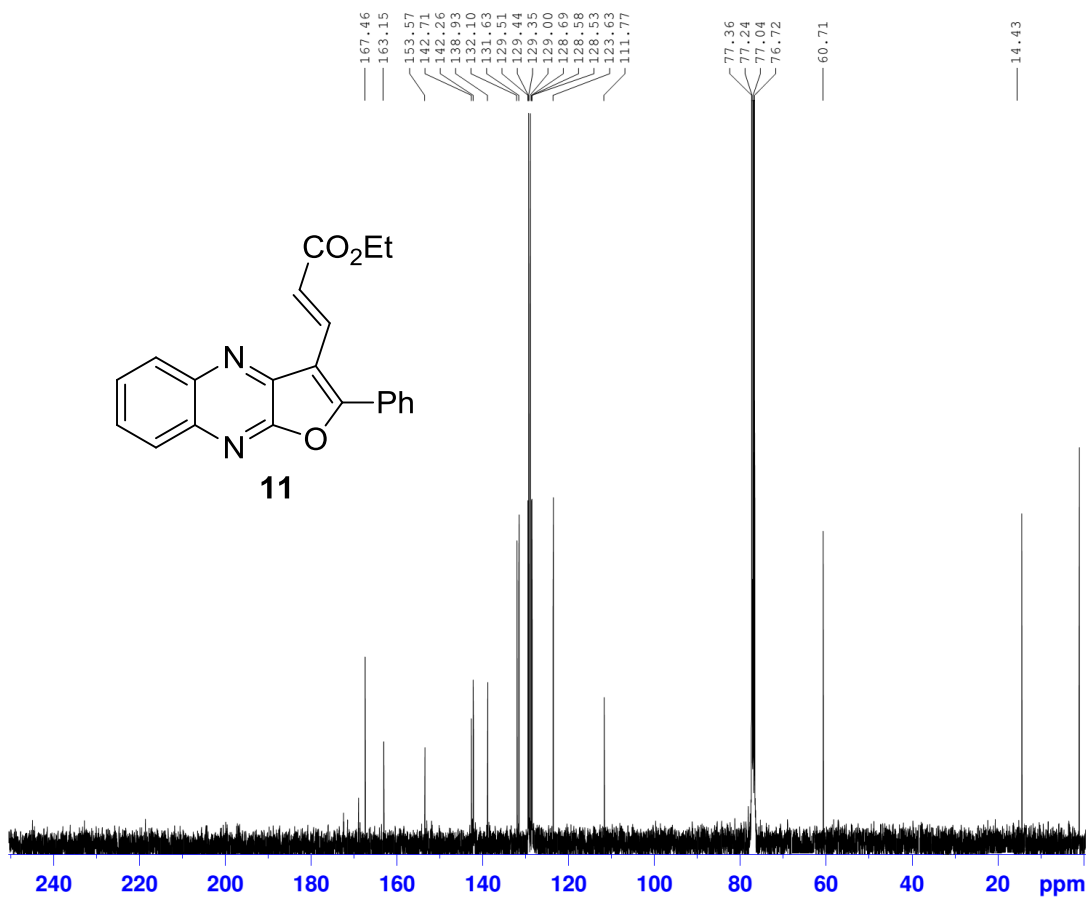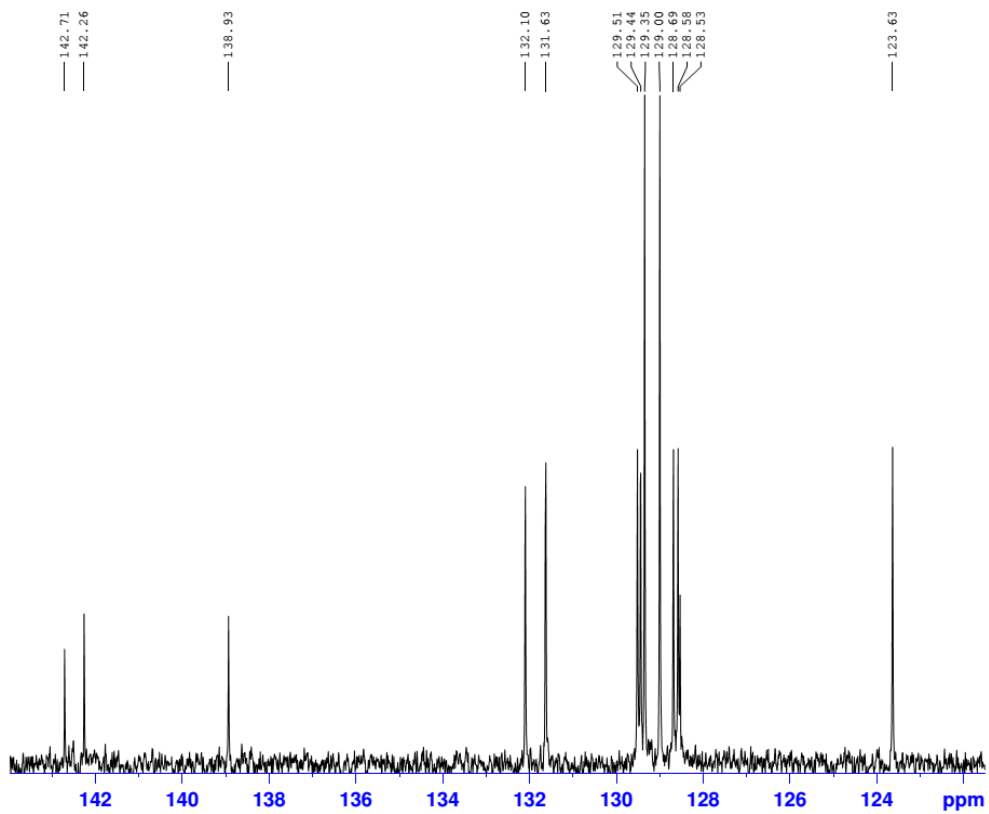

**Figure 60:** <sup>13</sup>C NMR spectrum of **11**

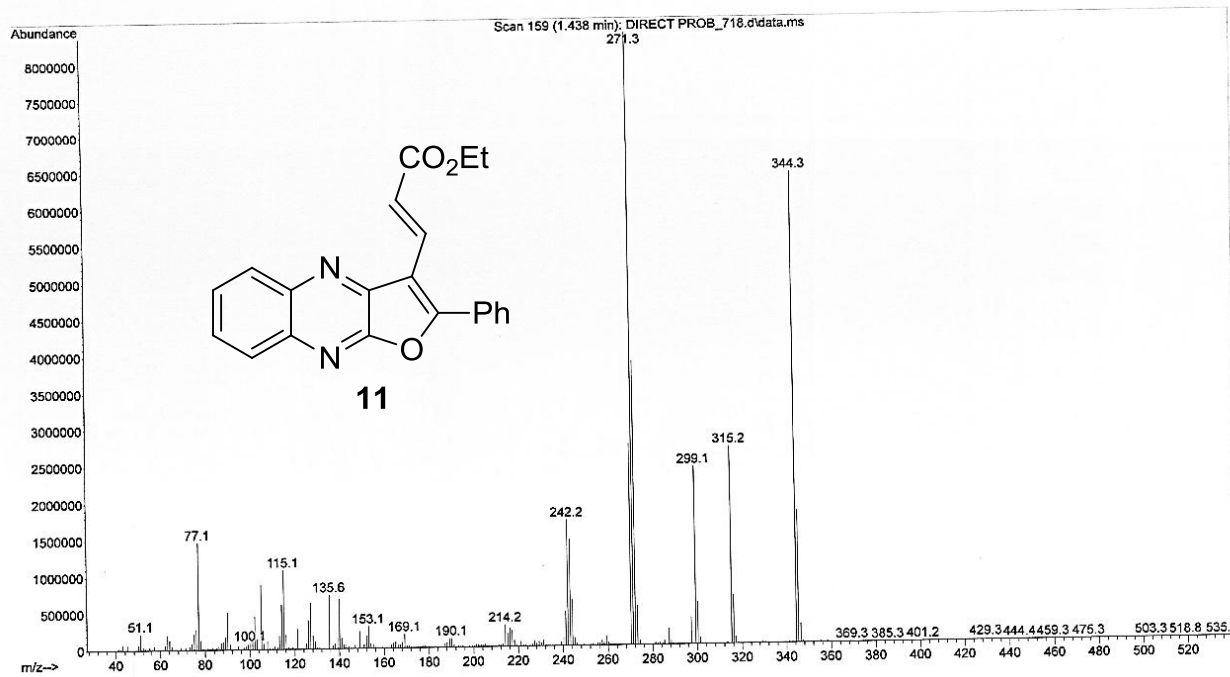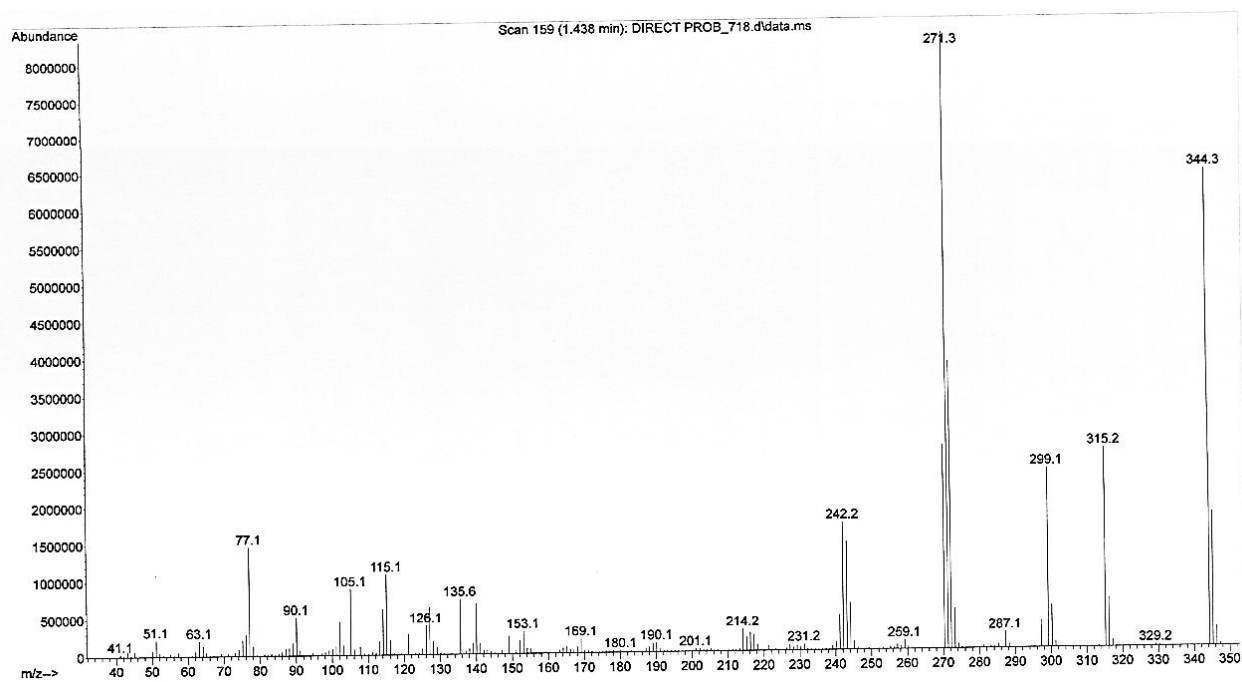

**Figure 61: Mass spectrum of 11**
